# Supplementary material
Source: PubMed Central journal article supplement (PMC5889132)
Supplement: NIHMS952388-supplement-Supplementary_Figures_and_Tables.pdf [file NIHMS952388-supplement-Supplementary_Figures_and_Tables.pdf]

**Supporting Information: The Effect of Advanced Secondary Municipal Wastewater Treatment on the Molecular Composition of Dissolved Organic Matter**

*Andrew C. Maizel and Christina K. Remucal\**

\* Corresponding author e-mail: remucal@wisc.edu; telephone: (608) 262-1820; fax: (608) 262-0454.

**Contents (51 pages): Figures S1-S45, Tables S1-S19**

**Table of Contents**

|                                                                    |           |
|--------------------------------------------------------------------|-----------|
| <b>S1. Sample characterization</b> .....                           | <b>2</b>  |
| <b>S2. FT-ICR MS analysis</b> .....                                | <b>4</b>  |
| <b>S3. van Krevelen diagrams of all Nine Springs samples</b> ..... | <b>7</b>  |
| <b>S4. Comparison of ESI polarity</b> .....                        | <b>21</b> |
| <b>S5. Process comparison</b> .....                                | <b>23</b> |
| <b>References</b> .....                                            | <b>51</b> |

## S1. Sample characterization

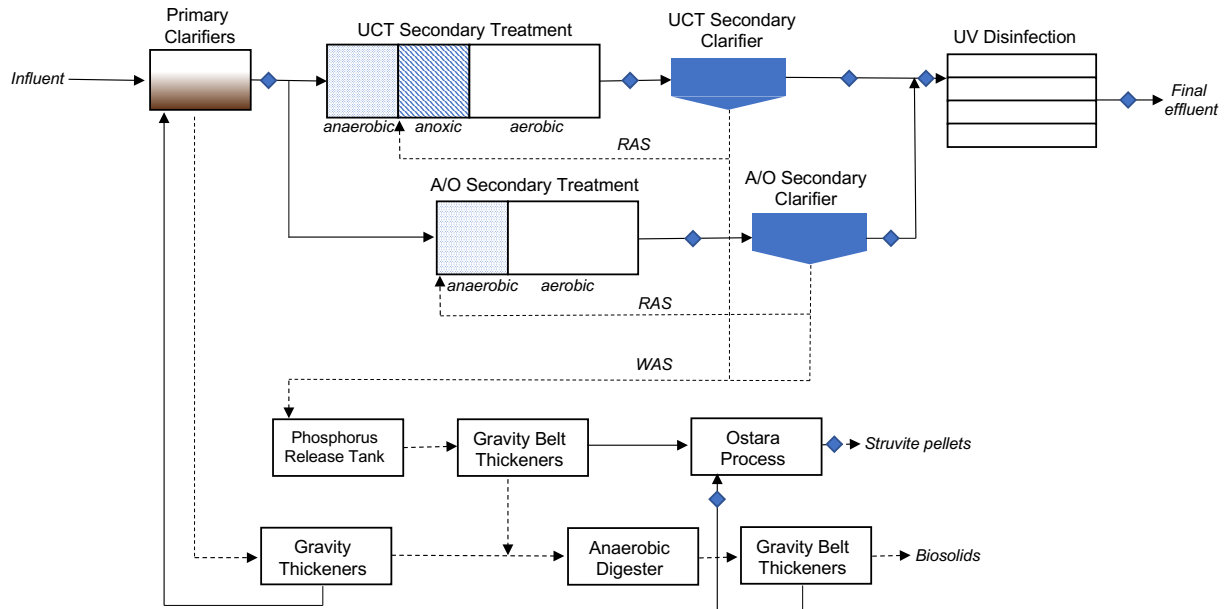

**Figure S1.** Schematic of liquid (solid lines) and solid (dashed lines) handling in the Nine Springs Wastewater Treatment Plant. RAS indicates return activated sludge. WAS indicates waste activated sludge. Sampling locations are indicated by diamonds.

### *Bulk analysis methods*

Dissolved organic carbon ([DOC]) was determined as the difference between total dissolved carbon and dissolved inorganic carbon with a GE Sievers M5310C TOC analyzer, calibrated daily with potassium hydrogen phthalate. pH was determined with a Mettler Toledo EL20 pH probe, which was calibrated daily. Alkalinity was determined by titration with 0.1 N H<sub>2</sub>SO<sub>4</sub> using a Mettler Toledo G20 automatic titrator, which was calibrated daily with CaCO<sub>3</sub>. Anion concentrations were determined by anion exchange chromatography with a Dionex ICS-2100 instrument utilizing conductivity detection, an AS22 4 x 250 mm column, and 30 mM NaOH eluent. Cation concentrations were quantified by inductively coupled plasma-optical emission spectroscopy with a Perkin Elmer Optima 4300 DV instrument. All anion and cation analytical measurements included calibrations with certified standards. Note that reliable DOC and alkalinity measurements could not be made for the Ostara influent or effluent due to the very high inorganic carbon concentrations in the two samples.

**Table S1.** Summary of anion concentrations in the main treatment train of the Nine Springs Wastewater Treatment Plant. BDL indicates that the anion concentration was below the detection limit.

| Sample                  | [Cl <sup>-</sup> ] (μM) | [NO <sub>3</sub> <sup>-</sup> ] (μM) | [NO <sub>2</sub> <sup>-</sup> ] (μM) | [SO <sub>4</sub> <sup>2-</sup> ] (μM) |
|-------------------------|-------------------------|--------------------------------------|--------------------------------------|---------------------------------------|
| Primary Effluent        | 10736                   | BDL                                  | BDL                                  | 1309                                  |
| A/O Effluent            | 9122                    | 1172                                 | BDL                                  | 1427                                  |
| A/O Secondary Clarifier | 8465                    | 841                                  | BDL                                  | 1407                                  |
| UCT Effluent            | 8868                    | 1079                                 | BDL                                  | 1359                                  |
| UCT Secondary Clarifier | 7973                    | 1152                                 | BDL                                  | 1425                                  |
| UV Influent             | 8747                    | 1124                                 | BDL                                  | 1403                                  |
| UV Effluent             | 8582                    | 1166                                 | BDL                                  | 1417                                  |

**Table S2.** Summary of cation concentrations in the main treatment train of the Nine Springs Wastewater Treatment Plant. BDL indicates that the cation concentration was below the detection limit.

| Sample                  | [Ca <sup>2+</sup> ] (μM) | [Fe(III)] (μM) | [K <sup>+</sup> ] (μM) | [Mg <sup>2+</sup> ] (μM) | [Na <sup>+</sup> ] (μM) |
|-------------------------|--------------------------|----------------|------------------------|--------------------------|-------------------------|
| Primary Effluent        | 2332 ± 21                | 3.4 ± 0.03     | 5.8 ± 0.6              | 1983 ± 16                | 10465 ± 82              |
| A/O Effluent            | 2453 ± 19                | 1.8 ± 0.01     | 3.6 ± 0.7              | 1789 ± 7                 | 8780 ± 63               |
| A/O Secondary Clarifier | 2172 ± 15                | BDL            | 3.5 ± 1.0              | 1779 ± 11                | 9020 ± 83               |
| UCT Effluent            | 2123 ± 13                | BDL            | 2.8 ± 0.6              | 1804 ± 17                | 8938 ± 62               |
| UCT Secondary Clarifier | 2129 ± 17                | BDL            | 5.0 ± 0.5              | 1790 ± 12                | 8781 ± 51               |
| UV Influent             | 2168 ± 22                | BDL            | 4.5 ± 0.5              | 1803 ± 11                | 8851 ± 118              |
| UV Effluent             | 2095 ± 27                | BDL            | 3.5 ± 0.6              | 1758 ± 12                | 8470 ± 92               |

## S2. FT-ICR MS analysis

For comparison of molecular composition before and after wastewater treatment processes, the formula lists were examined for formulas that were present in only the influent or the effluent. For common formulas, their change in intensity was compared using a relative intensity index:

$$\text{Relative intensity index} = \frac{I_{m/z,1}/\sum I_1}{I_{m/z,2}/\sum I_2} \quad (\text{S1})$$

where  $I_{m/z,1}$  is the intensity of the ion in the influent and  $\sum I_1$  is the sum of the intensities of all identified formulas in the influent. The analogous parameters with the subscript of 2 correspond to the effluent. Formulas with a relative intensity index  $>1$  are designated as having a higher relative intensity in the influent, while samples with an index  $<1$  have a higher relative intensity in the effluent.

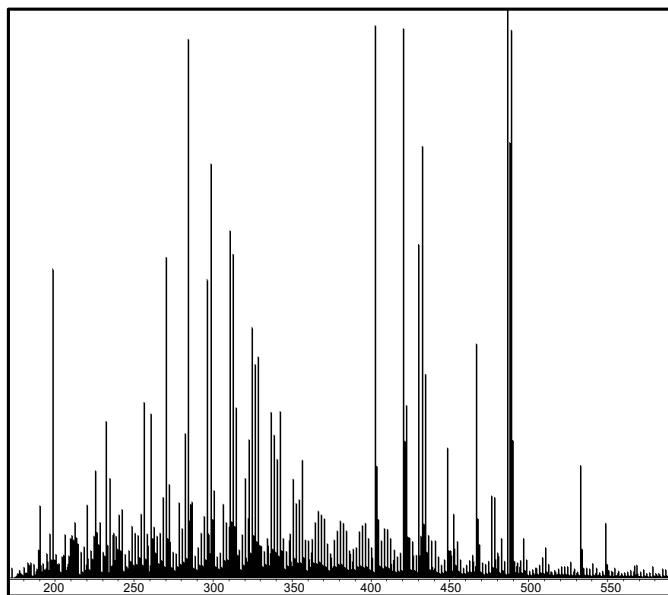

**Figure S2.** Representative negative mode electrospray ionization FT-ICR mass spectrum for UCT secondary effluent (170 – 600  $m/z$ ).

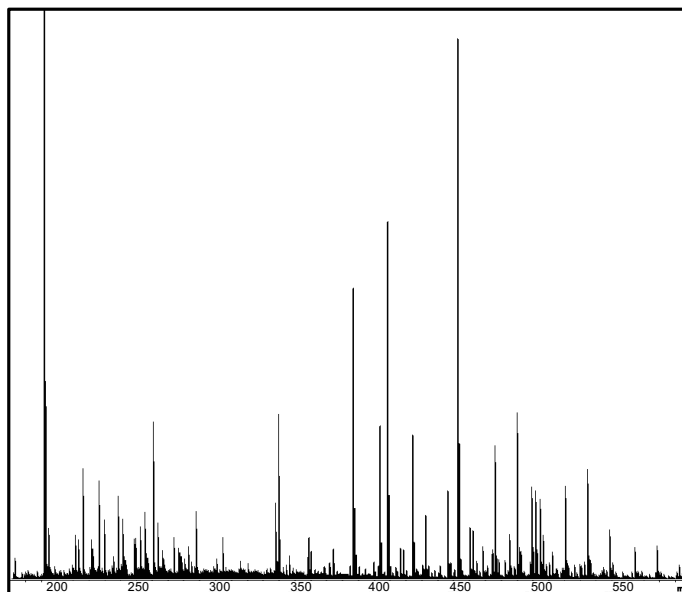

**Figure S3.** Representative positive mode electrospray ionization FT-ICR mass spectrum for A/O secondary effluent (170 – 600  $m/z$ ).

**Table S3.** The number of formulas in each compound class and the total number of formulas identified by FT-ICR MS in negative mode for each sample.

| Sample           | CHO  | CHON | CHOS | CHOP | CHOCI | Assigned formulas | Total # of peaks |
|------------------|------|------|------|------|-------|-------------------|------------------|
| Primary Effluent | 953  | 212  | 704  | 180  | 178   | 2227              | 18500            |
| A/O Effluent     | 1430 | 535  | 672  | 229  | 129   | 2995              | 19679            |
| A/O Secondary    | 1365 | 470  | 621  | 221  | 77    | 2754              | 20416            |
| UCT Effluent     | 1533 | 545  | 676  | 32   | 227   | 3013              | 19738            |
| UCT Secondary    | 1294 | 414  | 629  | 217  | 114   | 2668              | 20422            |
| UV Influent      | 1382 | 501  | 674  | 240  | 95    | 2892              | 20406            |
| UV Effluent      | 1442 | 487  | 684  | 202  | 109   | 2924              | 19925            |
| Ostara Influent  | 1118 | 349  | 558  | 19   | 62    | 2106              | 20007            |
| Ostara Effluent  | 1254 | 633  | 439  | 49   | 100   | 2475              | 17568            |

**Table S4.** The number of unique formulas in each compound class and the total number of formulas identified by FT-ICR MS in positive mode for each sample, as well as the average ( $\pm$  the standard deviation) of the H:C, O:C, DBE, AI,  $MLB_L$ , and mass accuracy of all assigned formulas.

| Sample           | H:C <sub>avg</sub> | O:C <sub>avg</sub> | DBE <sub>avg</sub> | AI <sub>avg</sub> | $MLB_L$ (%) | error (ppm)      | CHO  | CHON | Assigned formulas | Total # of peaks |
|------------------|--------------------|--------------------|--------------------|-------------------|-------------|------------------|------|------|-------------------|------------------|
| Primary Effluent | 1.65 $\pm$ 0.32    | 0.35 $\pm$ 0.14    | 4.89 $\pm$ 4.17    | 0.06 $\pm$ 0.23   | 72.5        | -0.02 $\pm$ 0.11 | 586  | 229  | 815               | 16565            |
| A/O Effluent     | 1.46 $\pm$ 0.33    | 0.43 $\pm$ 0.18    | 6.36 $\pm$ 3.46    | 0.14 $\pm$ 0.25   | 46.7        | -0.05 $\pm$ 0.09 | 1038 | 911  | 1949              | 19478            |
| A/O Secondary    | 1.47 $\pm$ 0.31    | 0.43 $\pm$ 0.17    | 6.40 $\pm$ 3.39    | 0.12 $\pm$ 0.25   | 48.4        | -0.03 $\pm$ 0.10 | 1196 | 608  | 1804              | 19415            |
| UCT Effluent     | 1.44 $\pm$ 0.33    | 0.39 $\pm$ 0.16    | 6.19 $\pm$ 3.51    | 0.17 $\pm$ 0.24   | 45.9        | -0.05 $\pm$ 0.10 | 834  | 351  | 1185              | 17719            |
| UCT Secondary    | 1.50 $\pm$ 0.32    | 0.43 $\pm$ 0.16    | 6.05 $\pm$ 3.40    | 0.11 $\pm$ 0.25   | 50.6        | -0.04 $\pm$ 0.09 | 1368 | 539  | 1907              | 17816            |
| UV Influent      | 1.55 $\pm$ 0.30    | 0.43 $\pm$ 0.16    | 5.79 $\pm$ 3.31    | 0.07 $\pm$ 0.25   | 57.1        | -0.04 $\pm$ 0.09 | 1053 | 633  | 1686              | 18764            |
| UV Effluent      | 1.52 $\pm$ 0.31    | 0.42 $\pm$ 0.16    | 6.04 $\pm$ 3.44    | 0.10 $\pm$ 0.24   | 52.8        | -0.03 $\pm$ 0.10 | 1260 | 467  | 1727              | 18605            |
| Ostara Influent  | 1.60 $\pm$ 0.30    | 0.41 $\pm$ 0.13    | 5.41 $\pm$ 3.60    | 0.05 $\pm$ 0.23   | 65.5        | 0.00 $\pm$ 0.11  | 920  | 184  | 1104              | 17794            |
| Ostara Effluent  | 1.59 $\pm$ 0.29    | 0.40 $\pm$ 0.16    | 5.23 $\pm$ 3.15    | 0.06 $\pm$ 0.23   | 64.2        | 0.00 $\pm$ 0.10  | 1017 | 283  | 1300              | 17786            |

**Table S5.** Ranges used to define compound classes in van Krevelen diagrams.

| Class                     | H:C     | O:C      | Reference                                          |
|---------------------------|---------|----------|----------------------------------------------------|
| 1. Lipids                 | 1.5-2.2 | 0-0.3    | (Hockaday et al. 2009, Sleighter and Hatcher 2007) |
| 2. Proteins               | 1.5-2.2 | 0.3-0.6  | (Hockaday et al. 2009, Kujawinski et al. 2009)     |
| 3. Aminosugars            | 1.5-1.7 | 0.6-0.7  | (Sleighter and Hatcher 2007)                       |
| 4. Carbohydrates          | >1.5    | >0.67    | (Hockaday et al. 2009)                             |
| 5. Condensed hydrocarbons | 0.5-1.1 | 0-0.25   | (Kujawinski et al. 2009)                           |
| 6. Lignin                 | 0.7-1.5 | 0.3-0.67 | (Hockaday et al. 2009, Kujawinski et al. 2009)     |
| 7. Tannin                 | 0.5-1.3 | 0.6-0.9  | (Sleighter and Hatcher 2007)                       |

### S3. van Krevelen diagrams of all Nine Springs samples

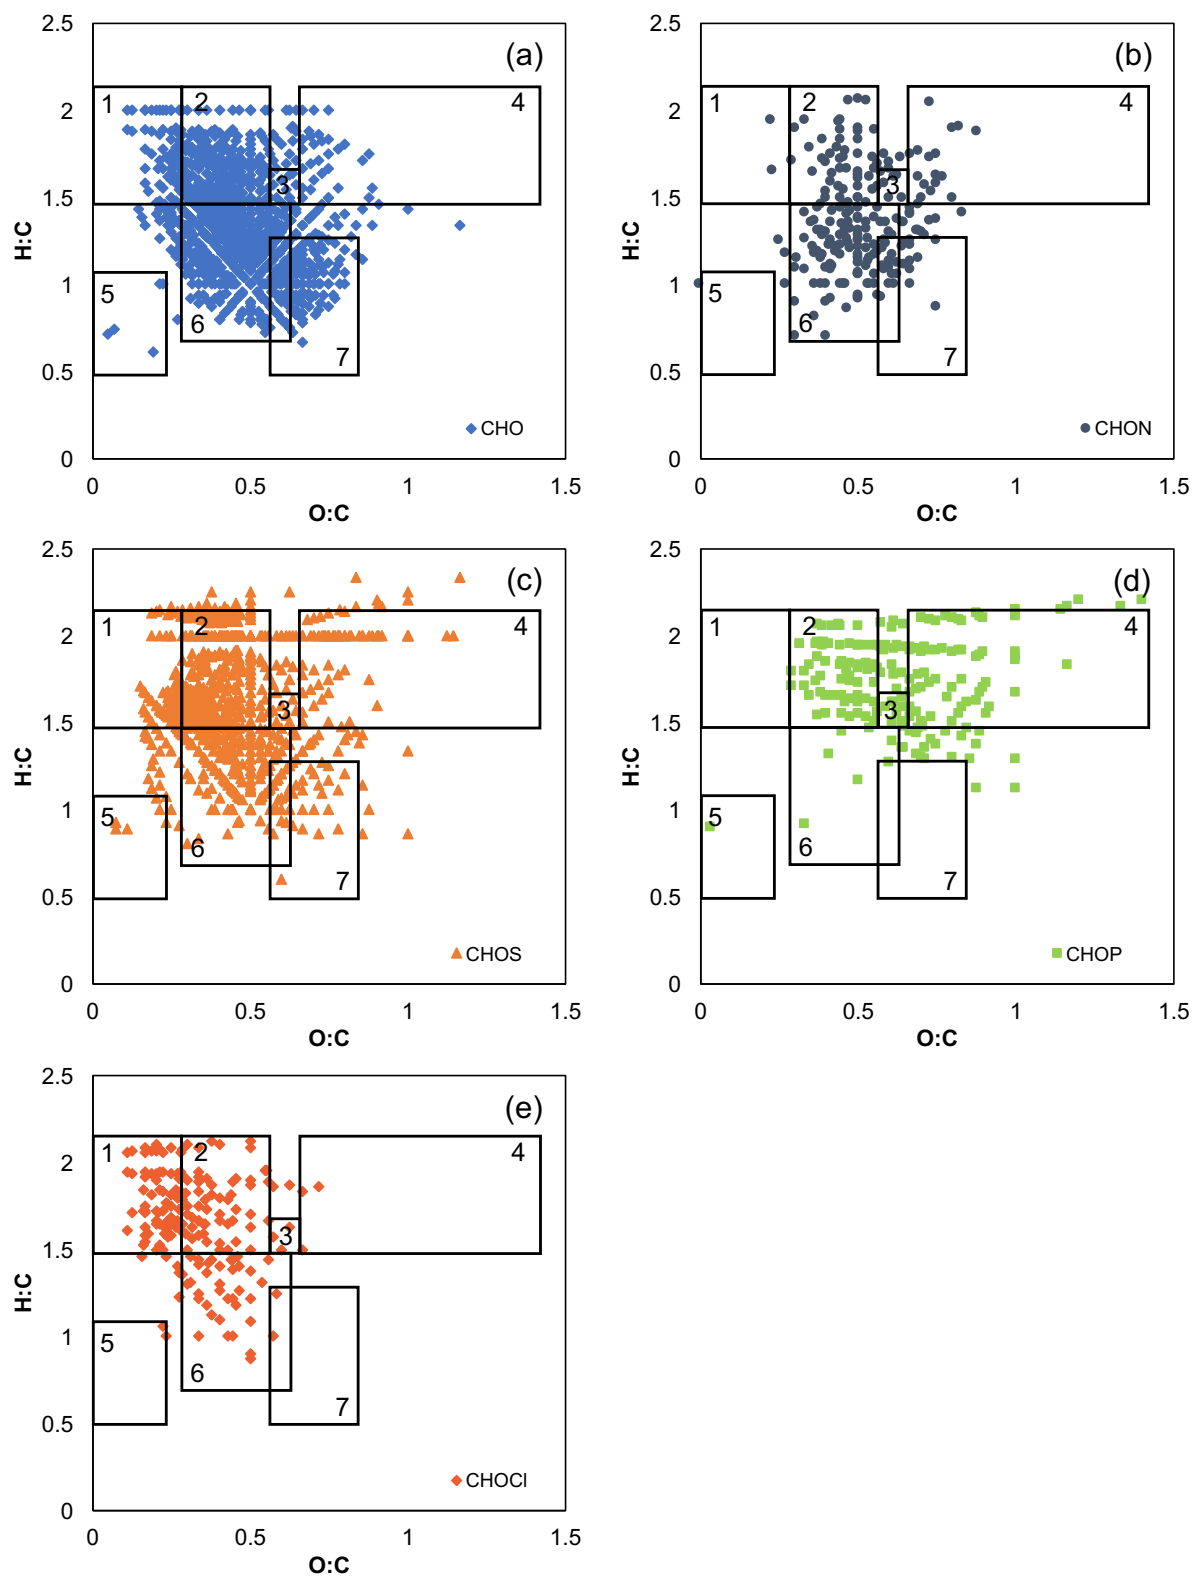

**Figure S4.** van Krevelen diagrams for (a) CHO, (b) CHON, (c) CHOS, (d) CHOP, and (e) CHOCI formulas in the Nine Springs primary effluent determined using negative mode FT-ICR MS.

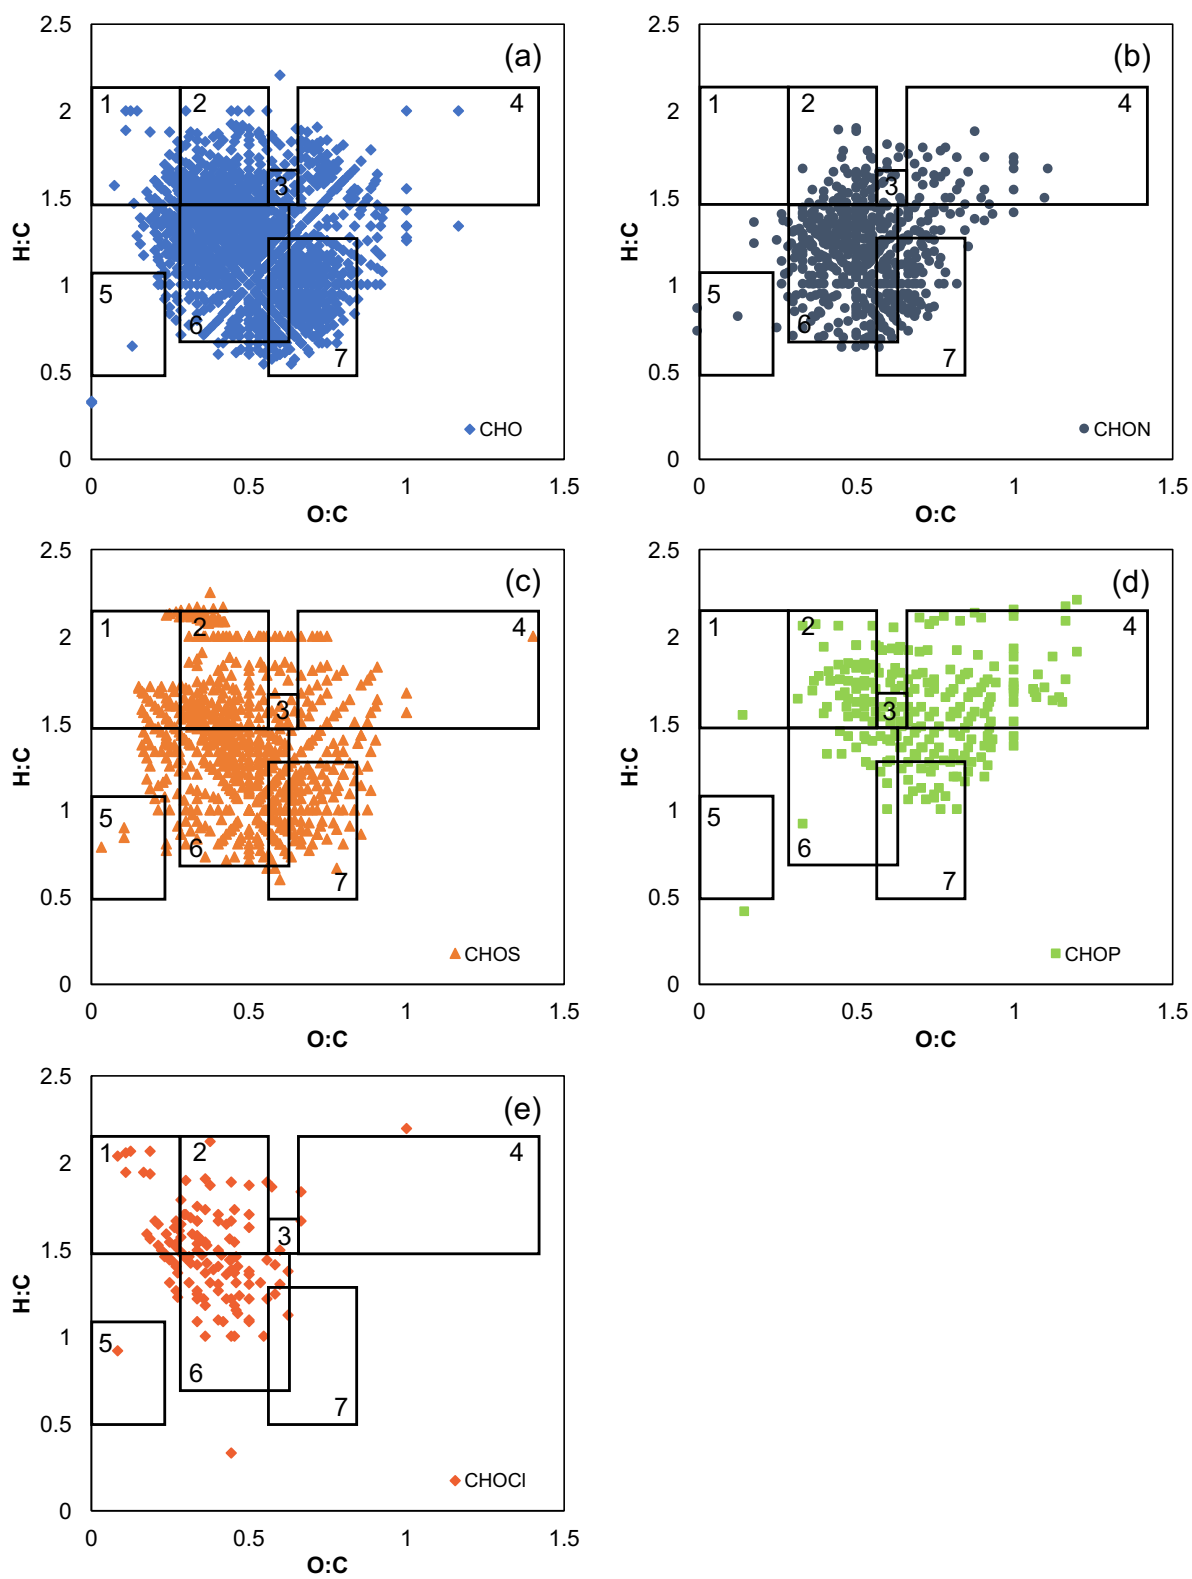

**Figure S5.** van Krevelen diagrams for (a) CHO, (b) CHON, (c) CHOS, (d) CHOP, and (e) CHOCI formulas in the A/O secondary effluent determined using negative mode FT-ICR MS.



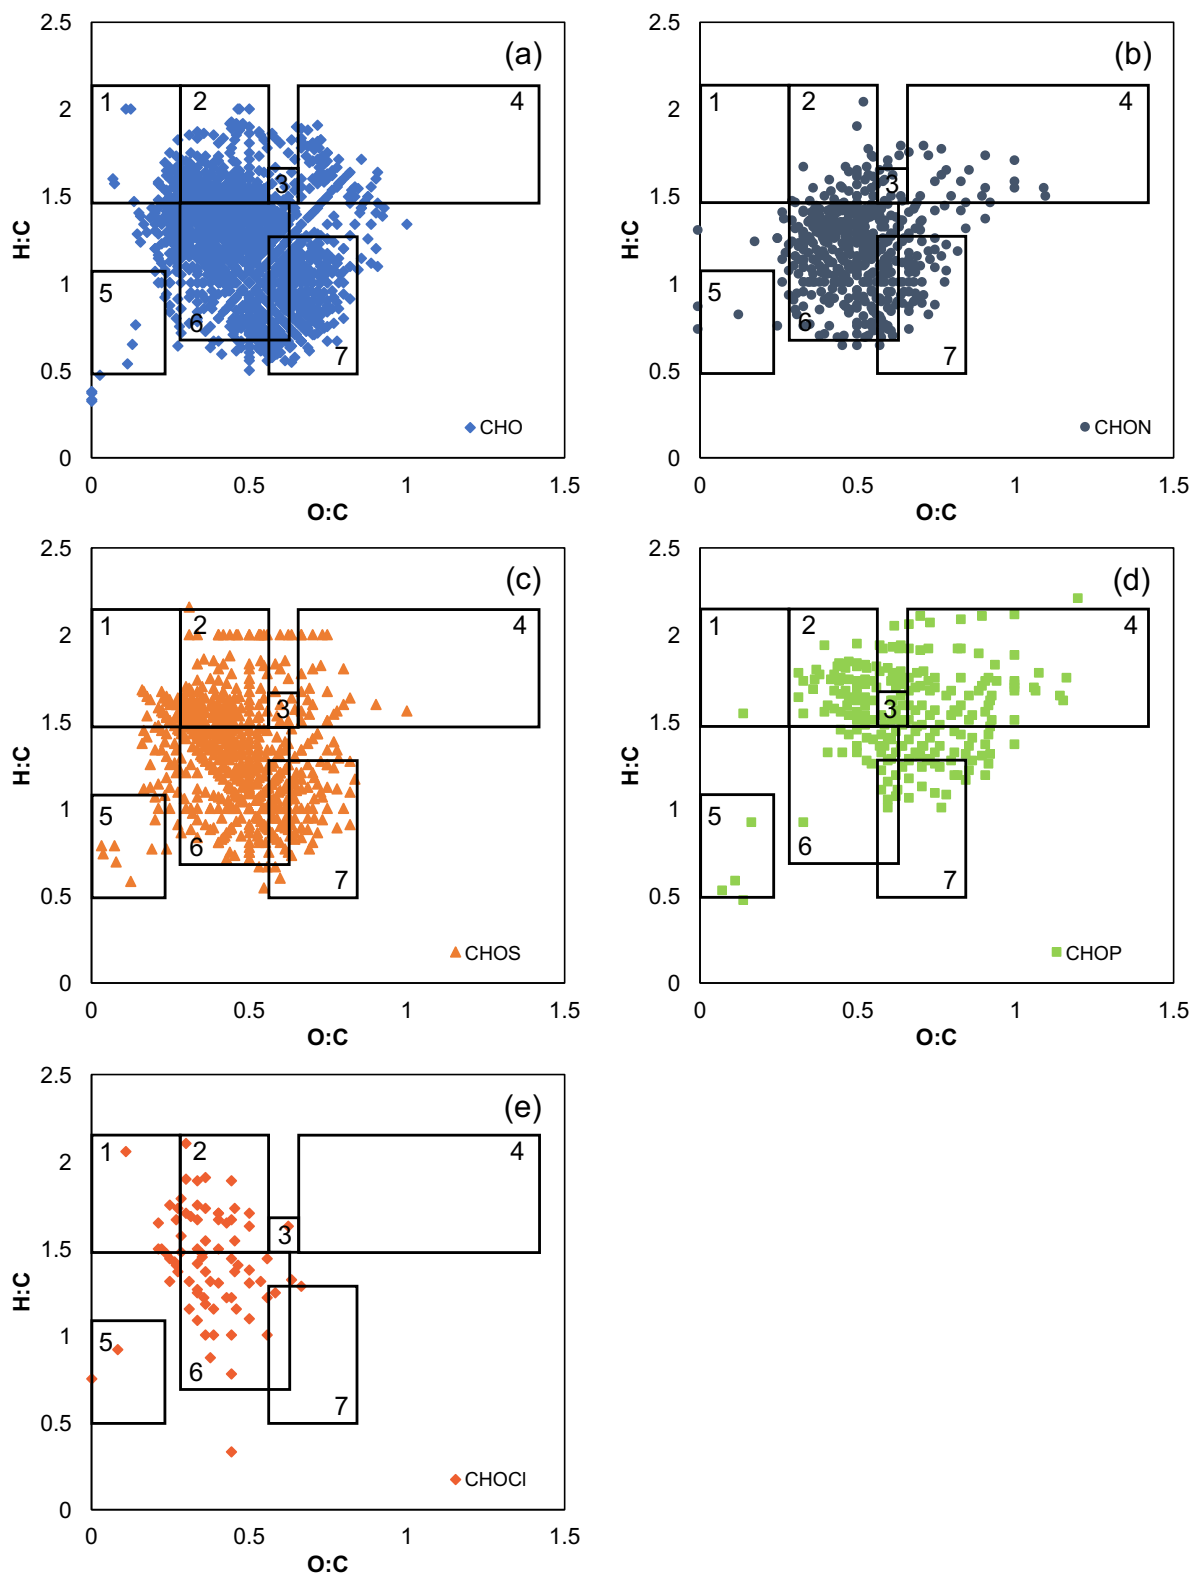

**Figure S6.** van Krevelen diagrams for (a) CHO, (b) CHON, (c) CHOS, (d) CHOP, and (e) CHOCI formulas in the A/O secondary clarifier effluent determined using negative mode FT-ICR MS.

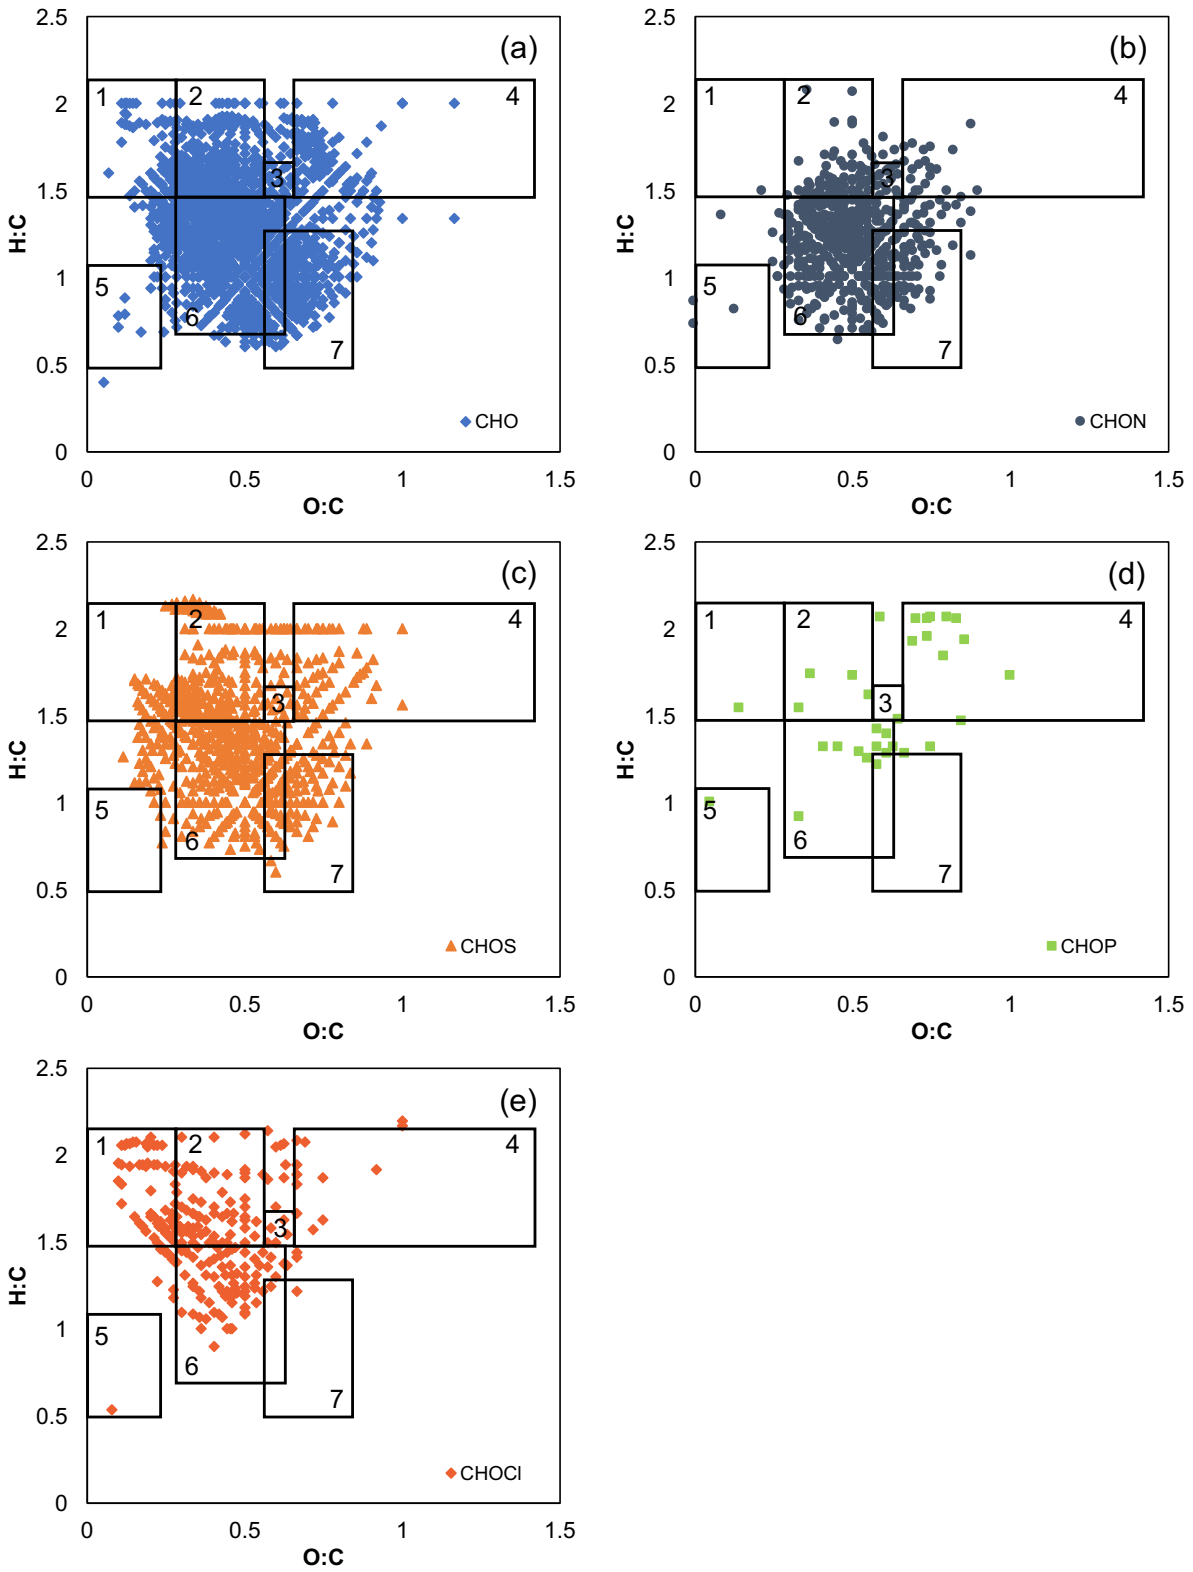

**Figure S7.** van Krevelen diagrams for (a) CHO, (b) CHON, (c) CHOS, (d) CHOP, and (e) CHOCI formulas in the Nine Springs UCT secondary effluent determined using negative mode FT-ICR MS.

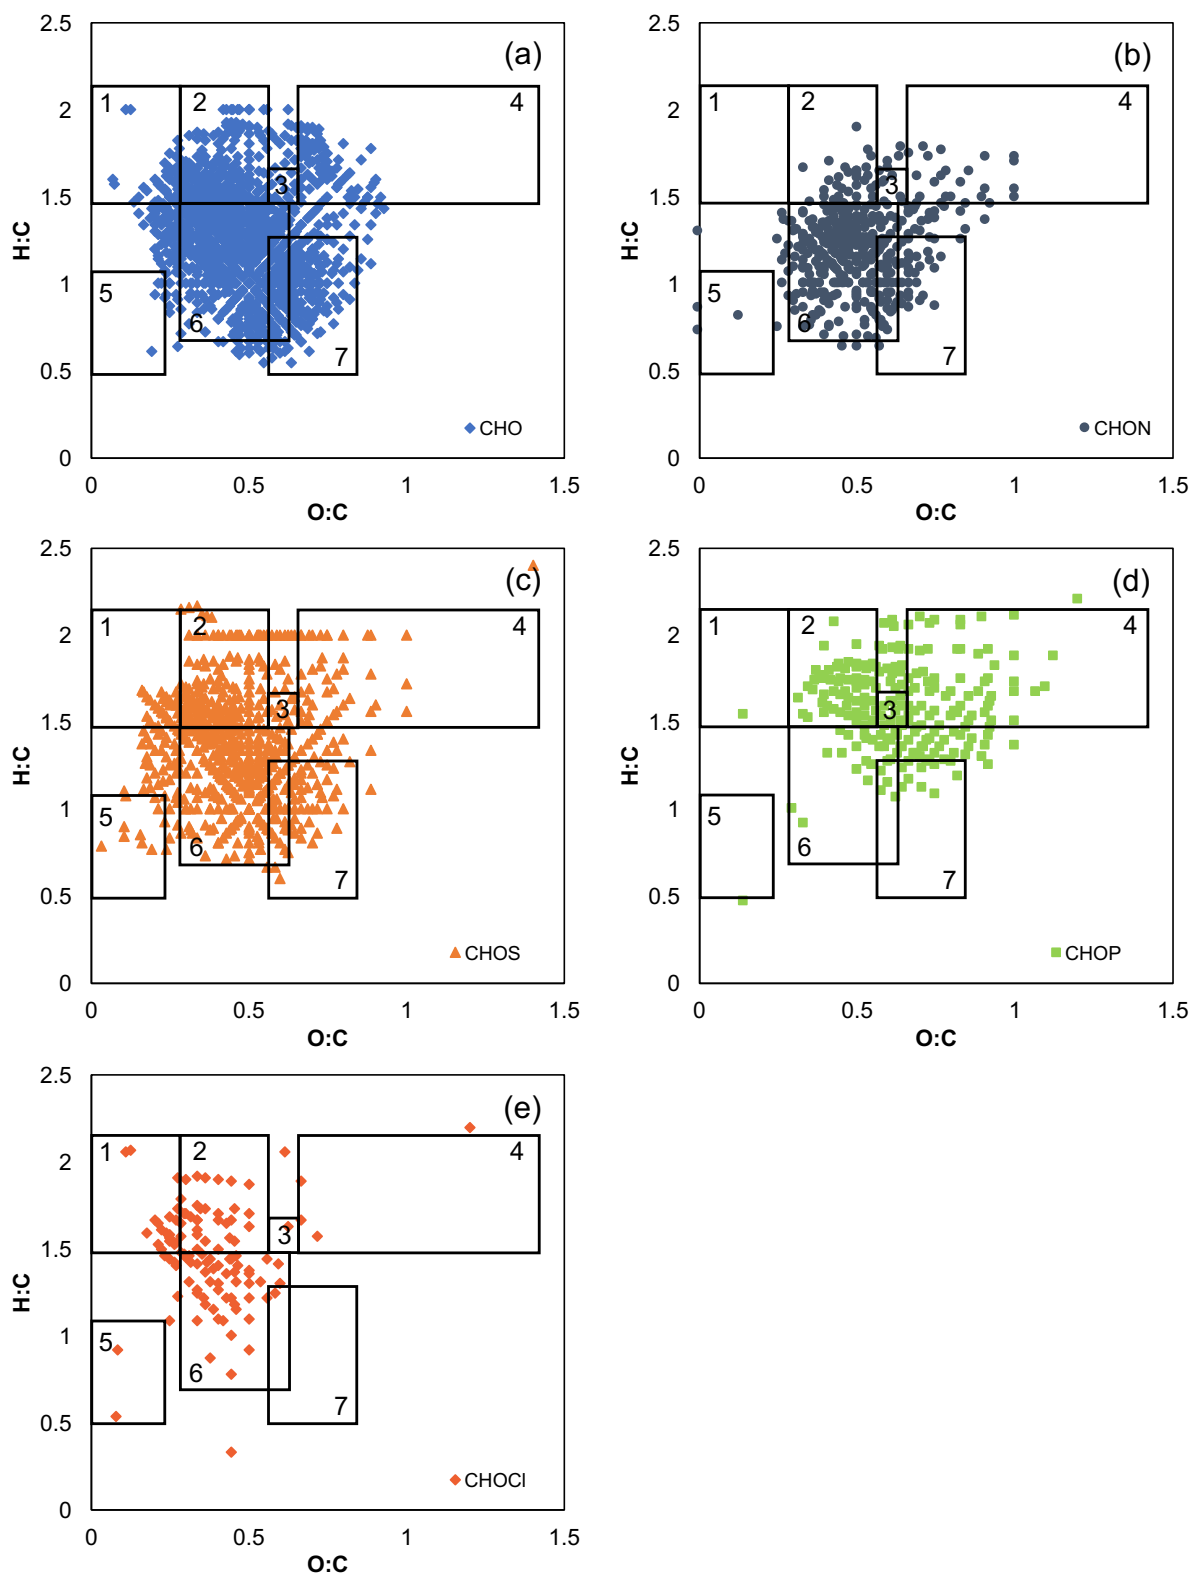

**Figure S8.** van Krevelen diagrams for (a) CHO, (b) CHON, (c) CHOS, (d) CHOP, and (e) CHOCI formulas in the UCT secondary clarifier effluent determined using negative mode FT-ICR MS.

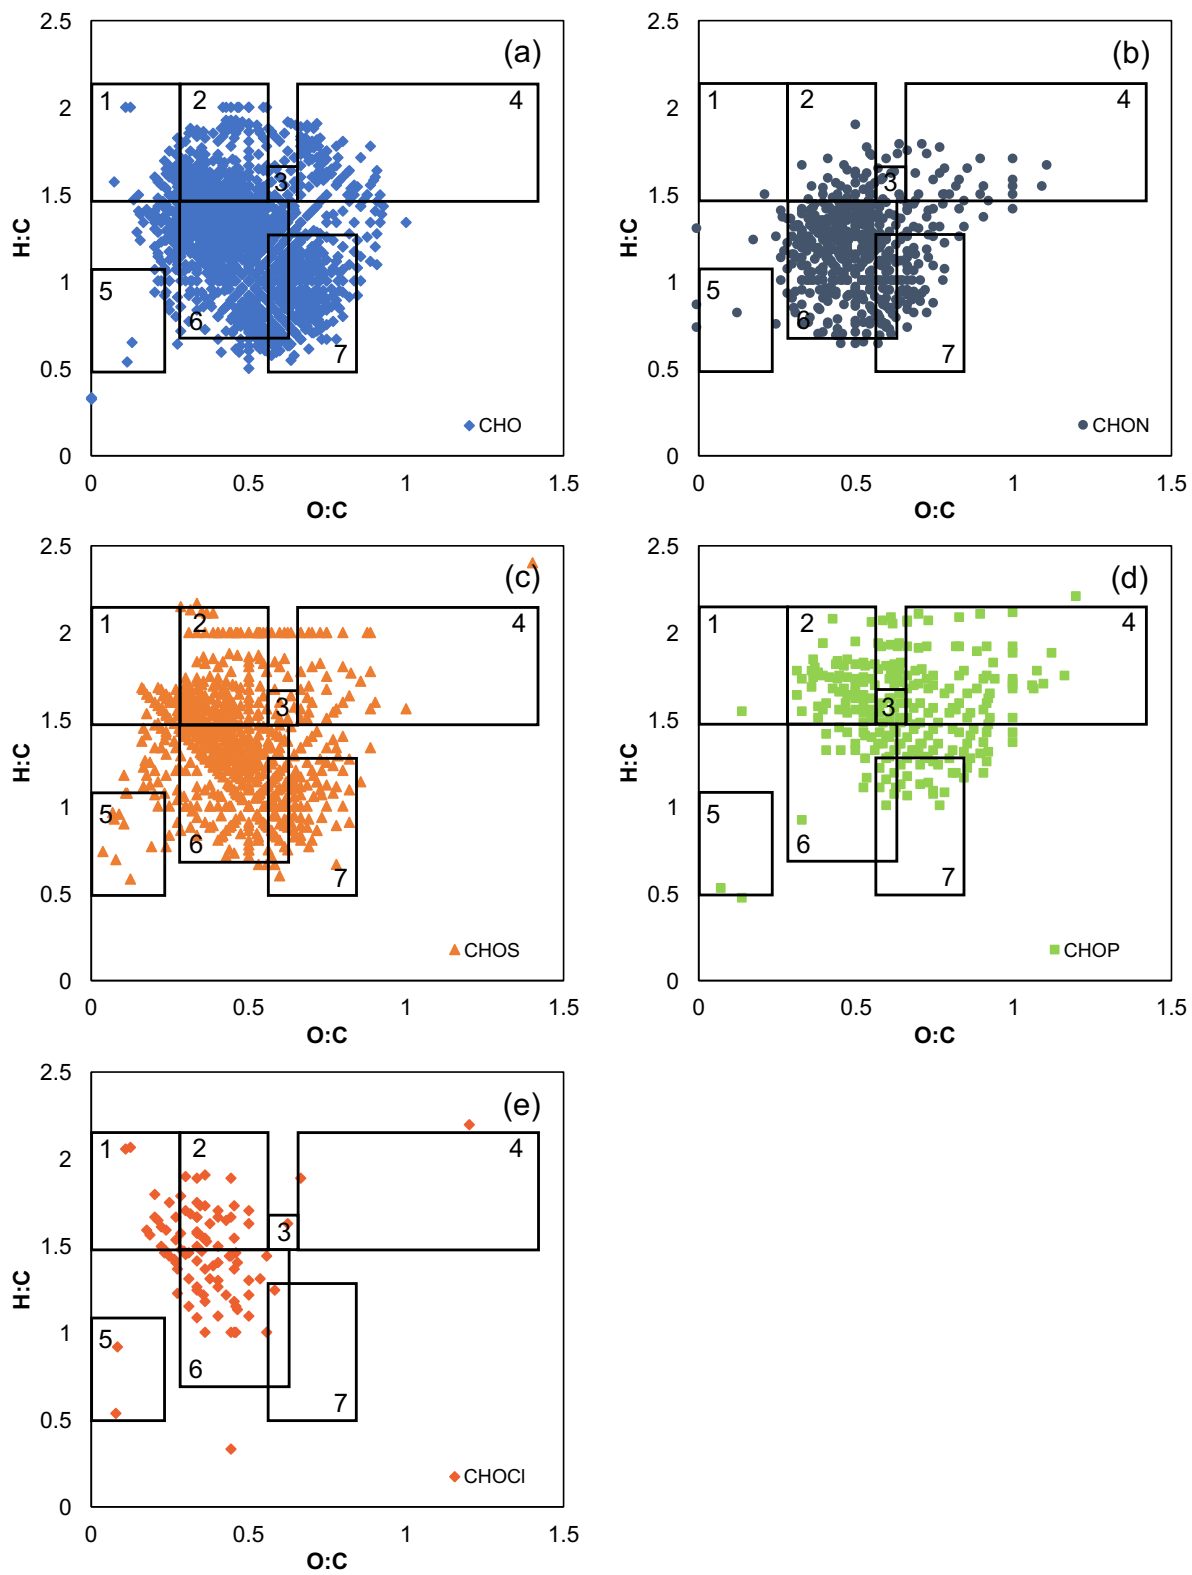

**Figure S9.** van Krevelen diagrams for (a) CHO, (b) CHON, (c) CHOS, (d) CHOP, and (e) CHOCI formulas in the Nine Springs UV influent determined using negative mode FT-ICR MS.

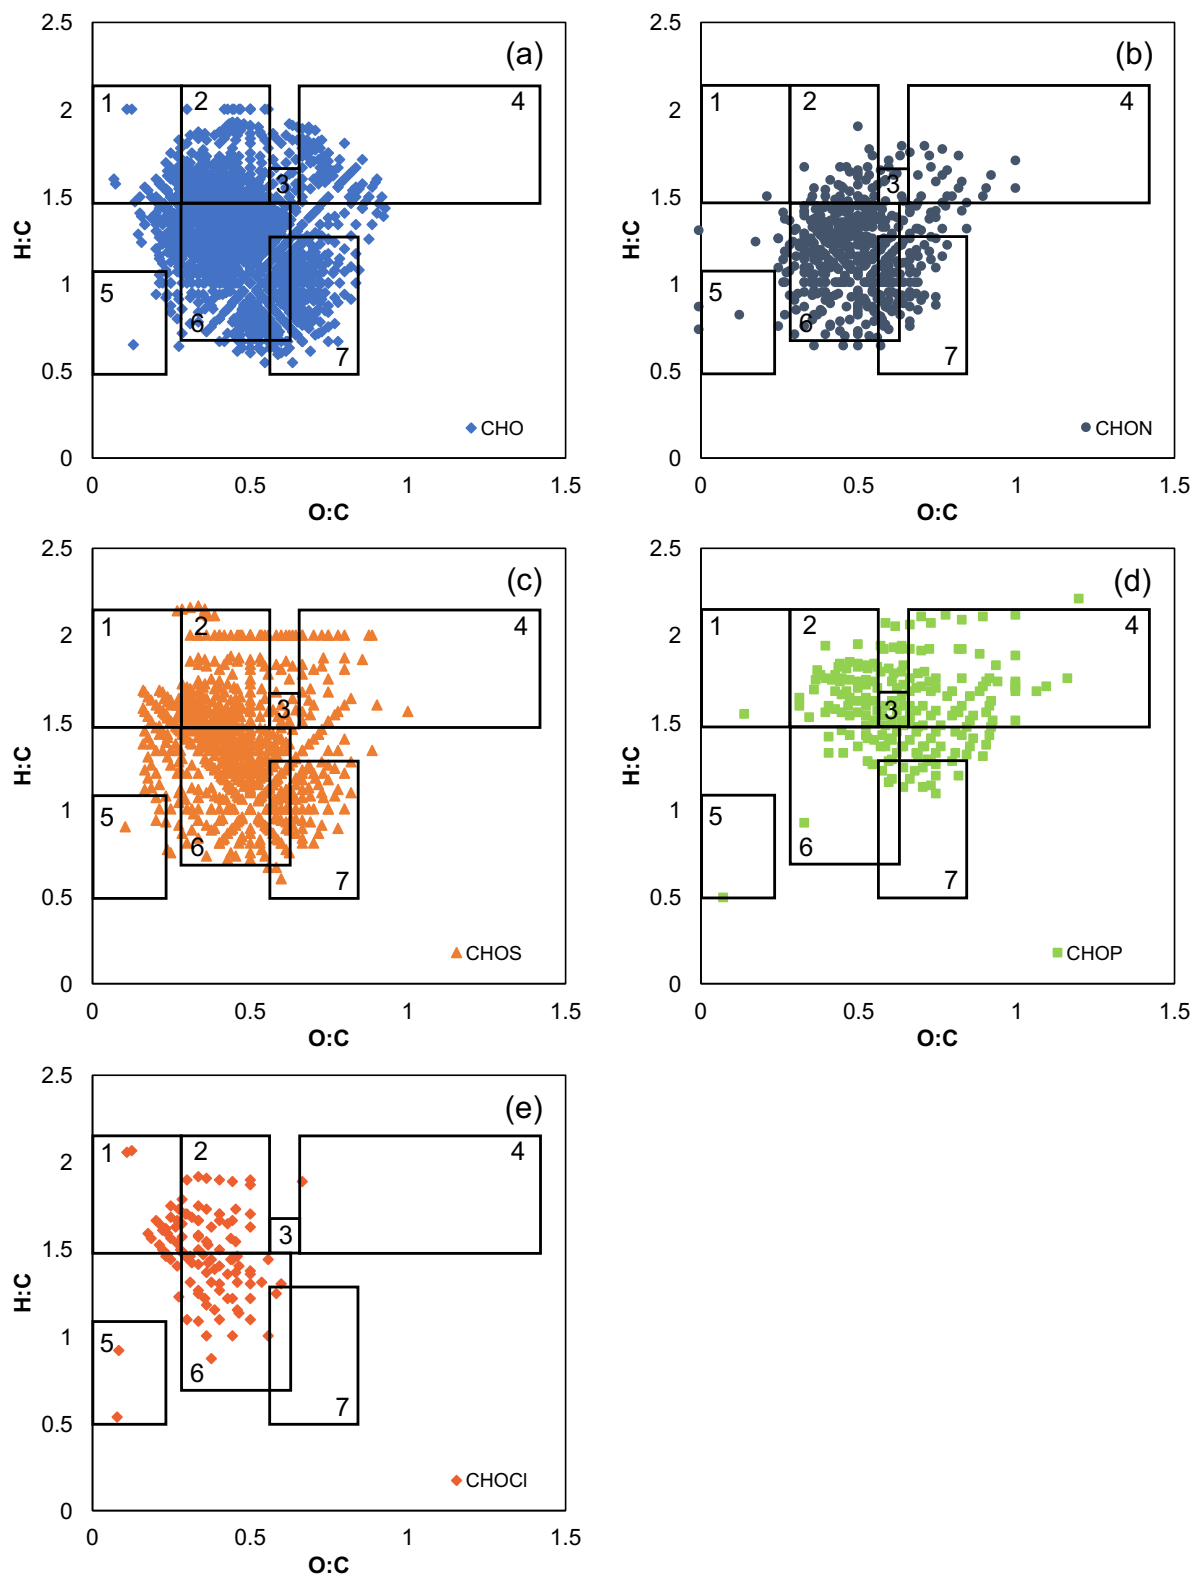

**Figure S10.** van Krevelen diagrams for (a) CHO, (b) CHON, (c) CHOS, (d) CHOP, and (e) CHOCI formulas in the Nine Springs UV effluent determined using negative mode FT-ICR MS.

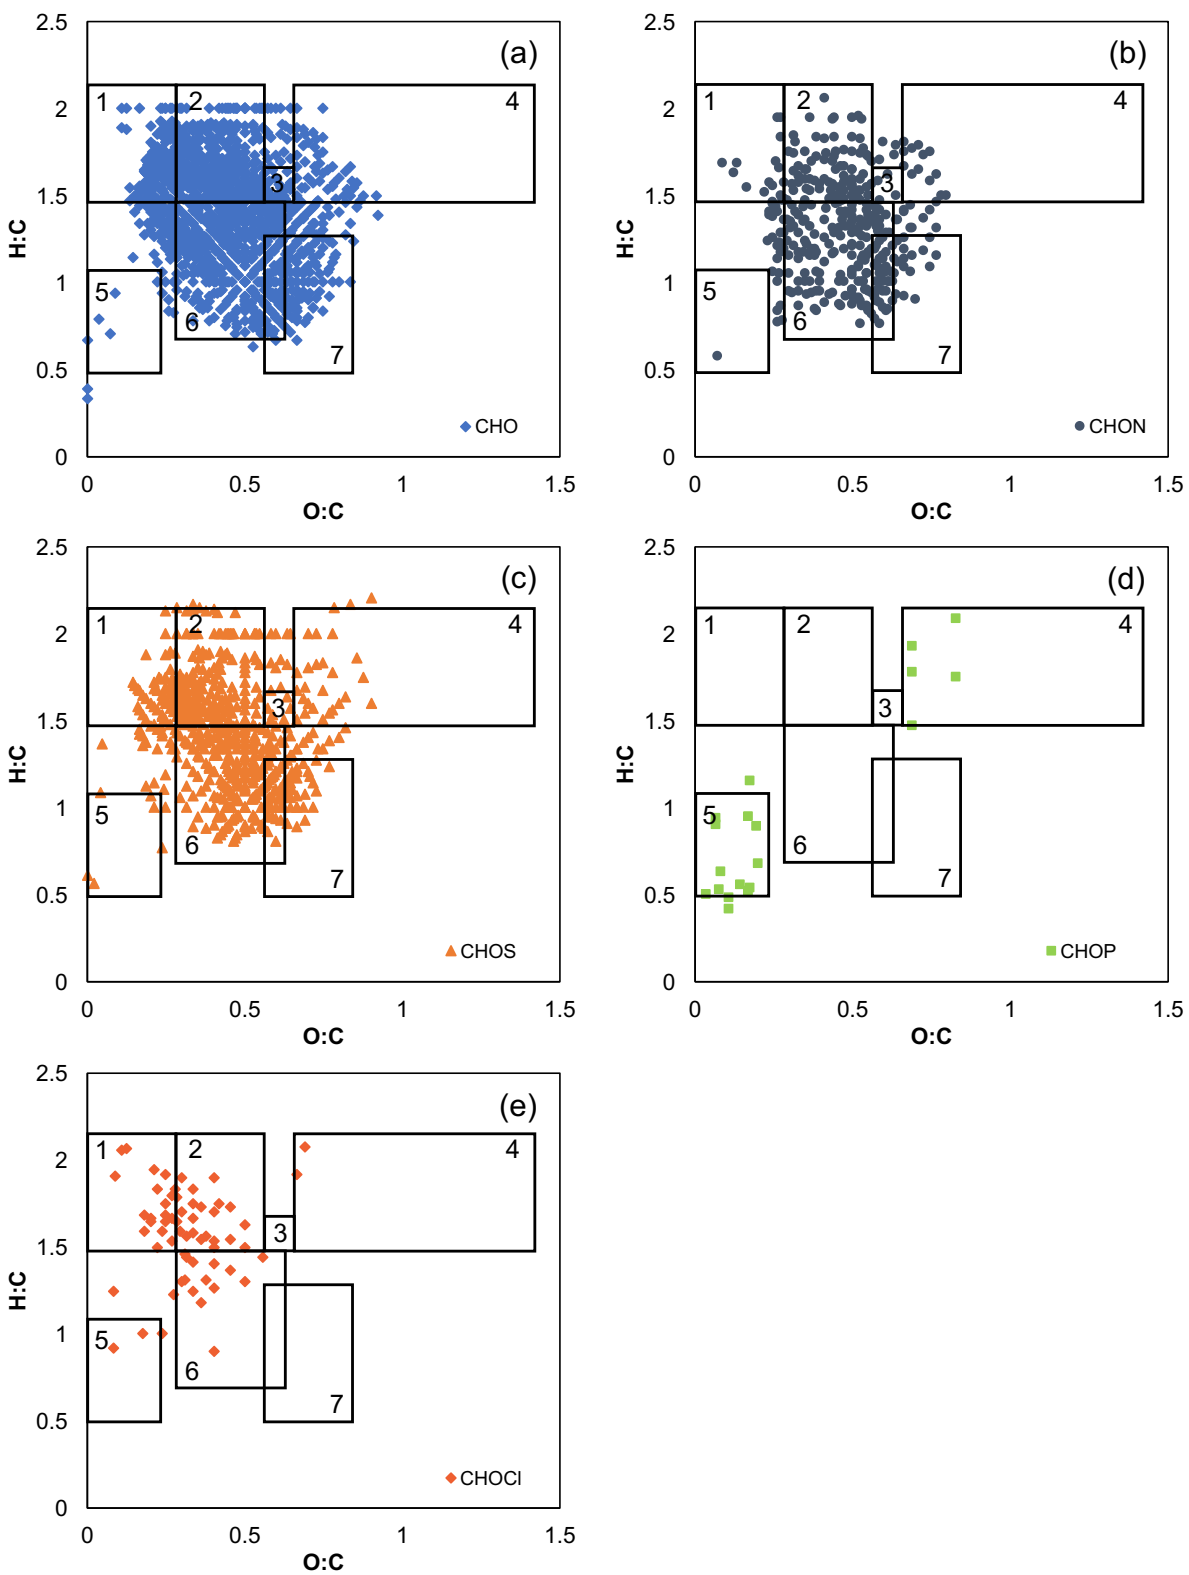

**Figure S11.** van Krevelen diagrams for (a) CHO, (b) CHON, (c) CHOS, (d) CHOP, and (e) CHOCI formulas in the Nine Springs Ostara influent determined using negative mode FT-ICR MS.

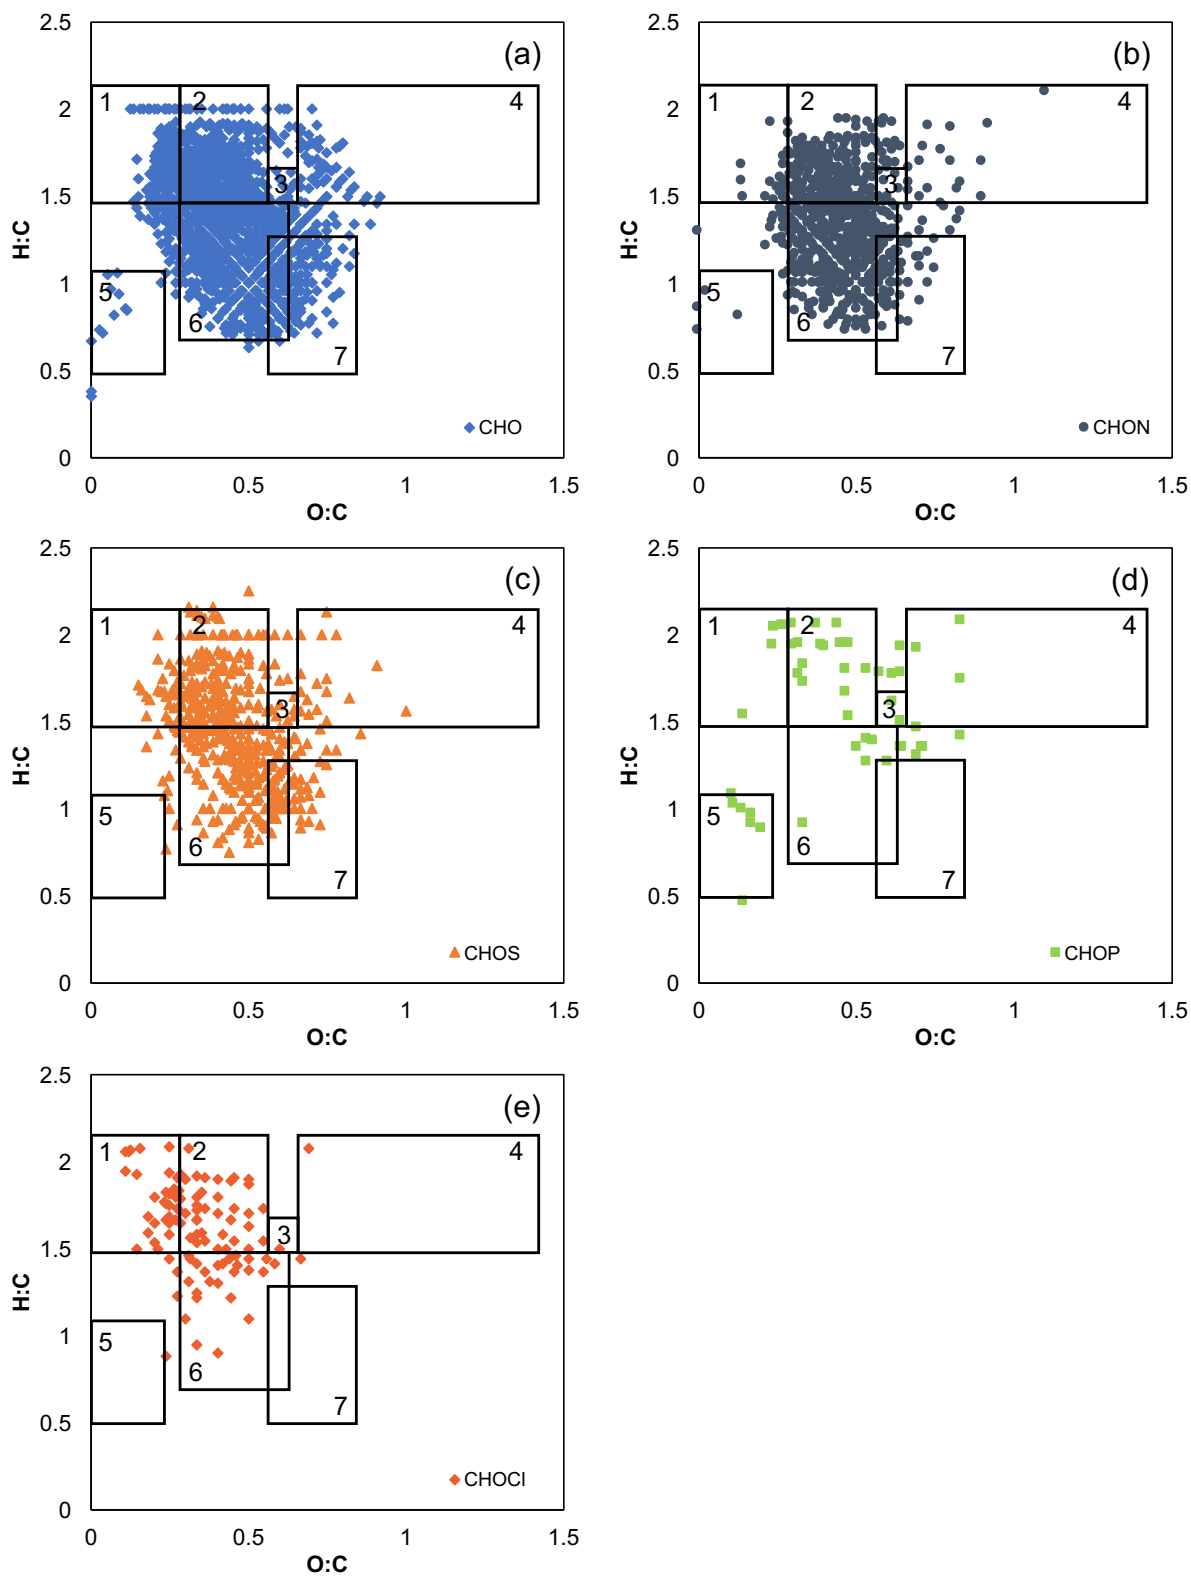

**Figure S12.** van Krevelen diagrams for (a) CHO, (b) CHON, (c) CHOS, (d) CHOP, and (e) CHOCI formulas in the Nine Springs Ostara effluent determined using negative mode FT-ICR MS.

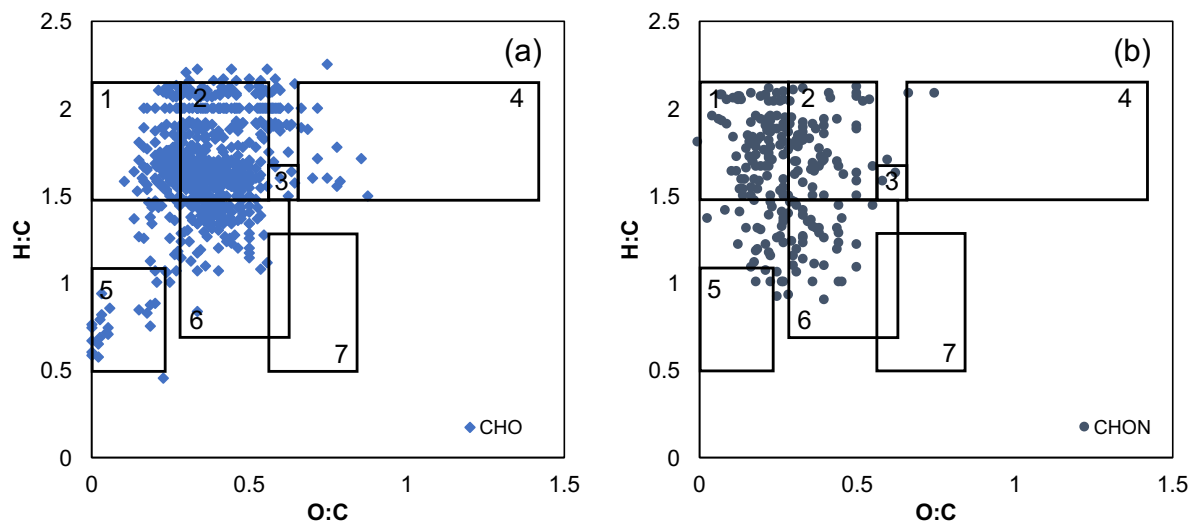

**Figure S13.** van Krevelen diagrams for (a) CHO and (b) CHON formulas in the Nine Springs primary effluent determined using positive mode FT-ICR MS.

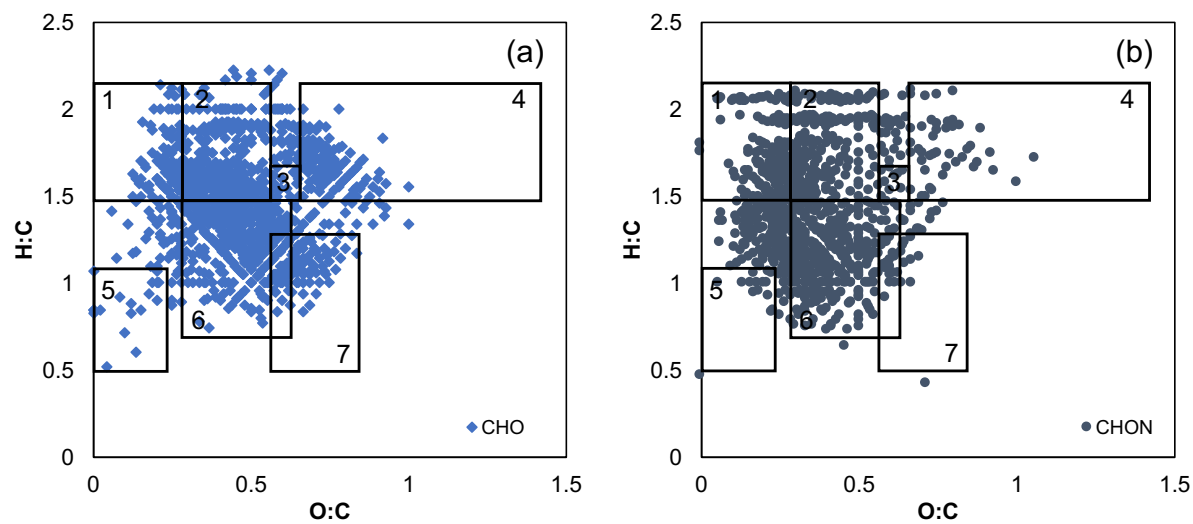

**Figure S14.** van Krevelen diagrams for (a) CHO and (b) CHON formulas in the Nine Springs A/O secondary effluent determined using positive mode FT-ICR MS.



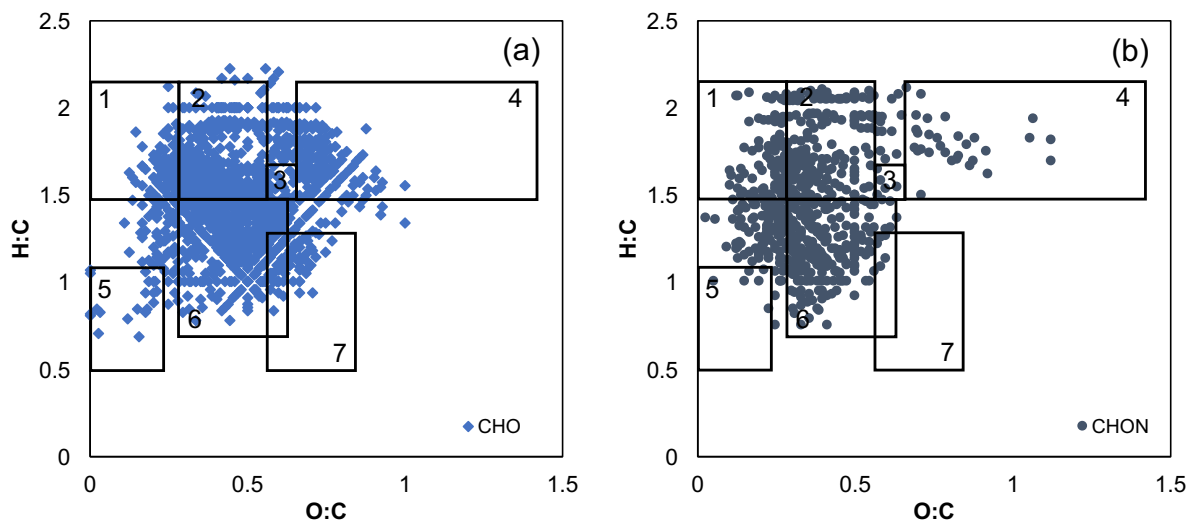

**Figure S15.** van Krevelen diagrams for (a) CHO and (b) CHON formulas in the Nine Springs A/O secondary clarifier effluent determined using positive mode FT-ICR MS.

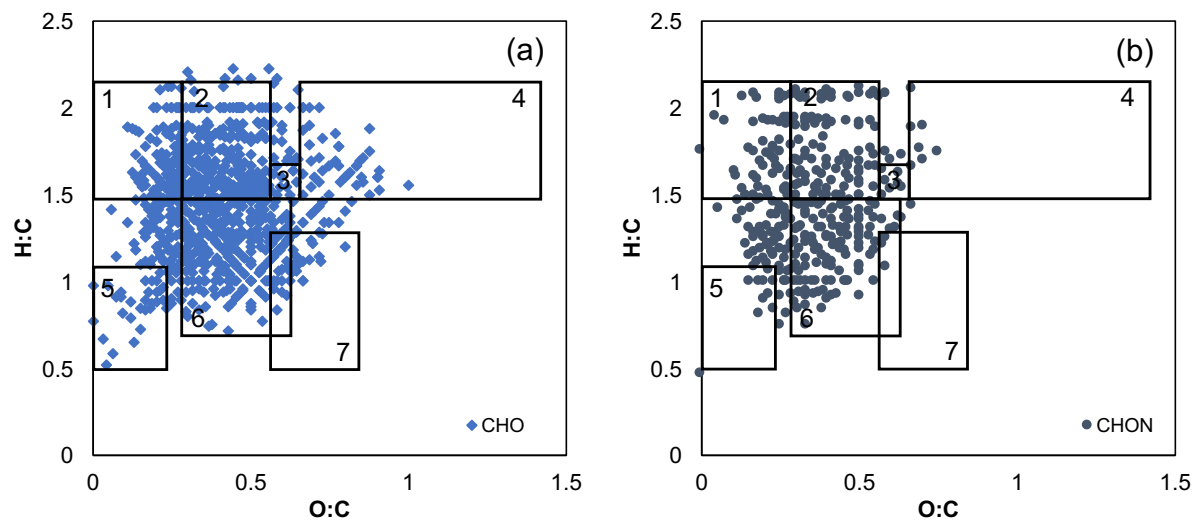

**Figure S16.** van Krevelen diagrams for (a) CHO and (b) CHON formulas in the Nine Springs UCT secondary effluent determined using positive mode FT-ICR MS.

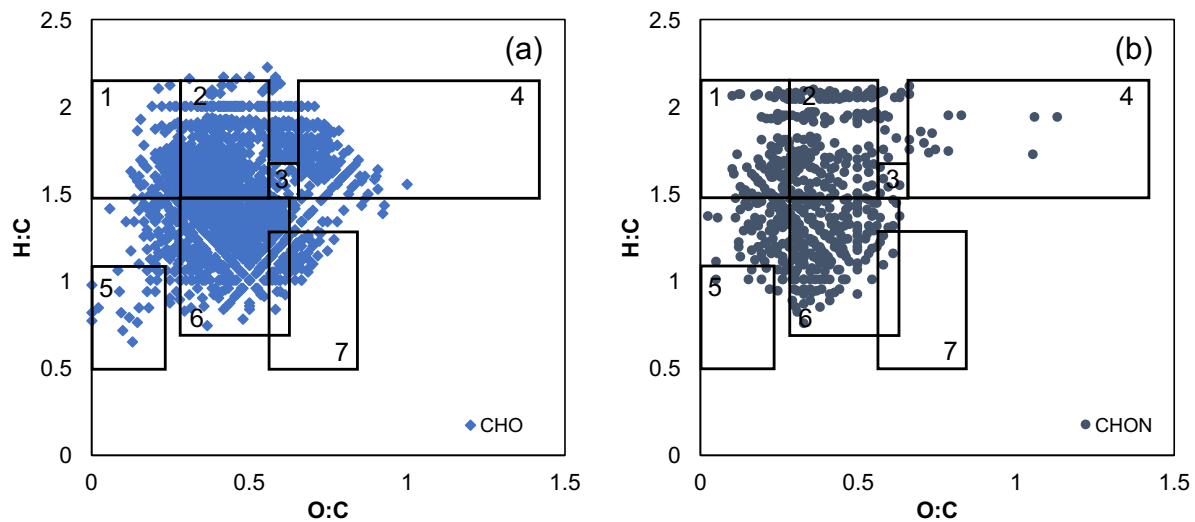

**Figure S17.** van Krevelen diagrams for (a) CHO and (b) CHON formulas in the Nine Springs UCT secondary clarifier effluent determined using positive mode FT-ICR MS.

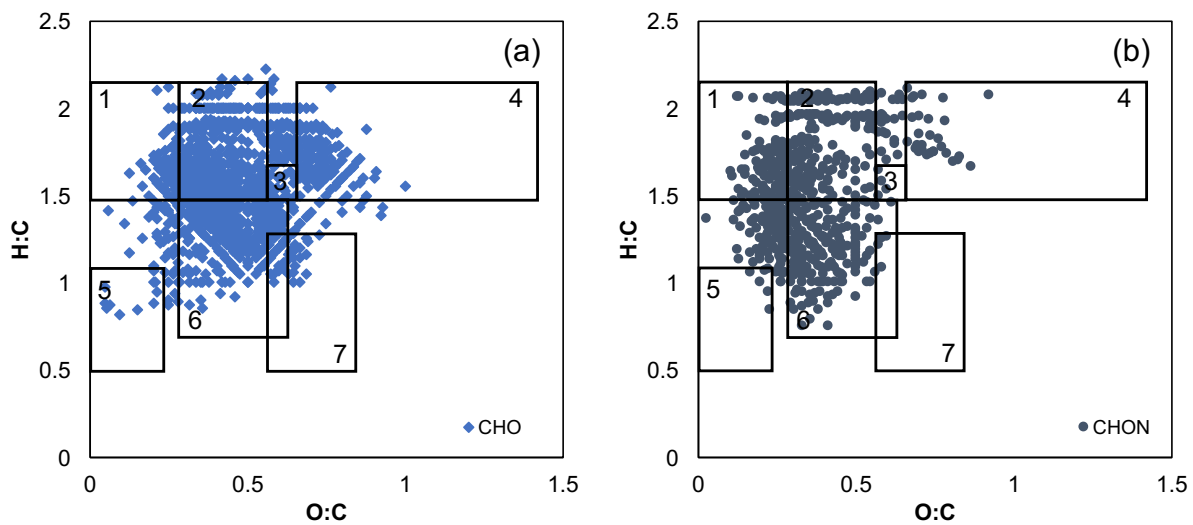

**Figure S18.** van Krevelen diagrams for (a) CHO and (b) CHON formulas in the Nine Springs UV influent determined using positive mode FT-ICR MS.

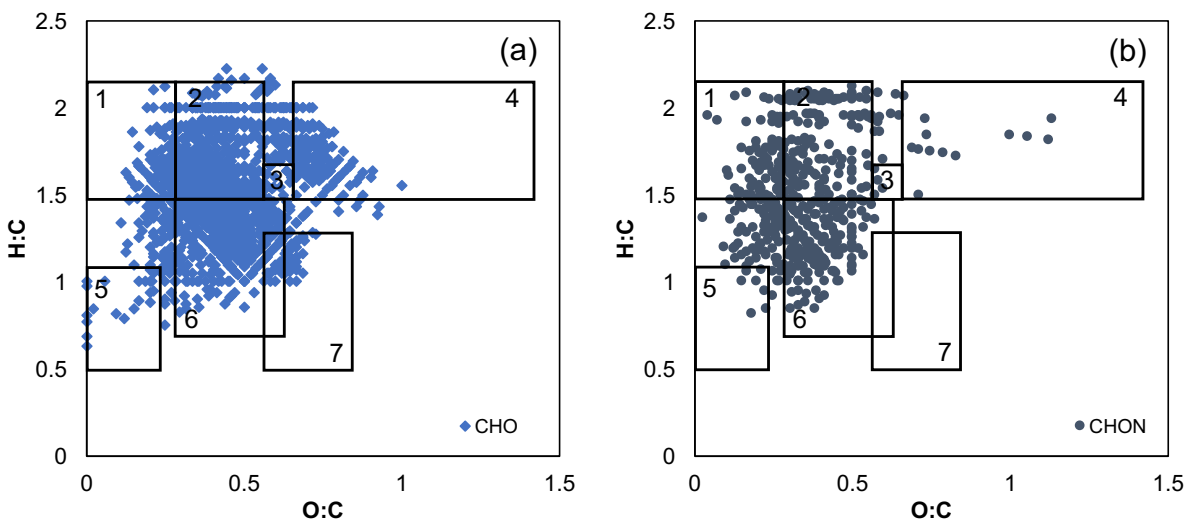

**Figure S19.** van Krevelen diagrams for (a) CHO and (b) CHON formulas in the Nine Springs UV effluent determined using positive mode FT-ICR MS.

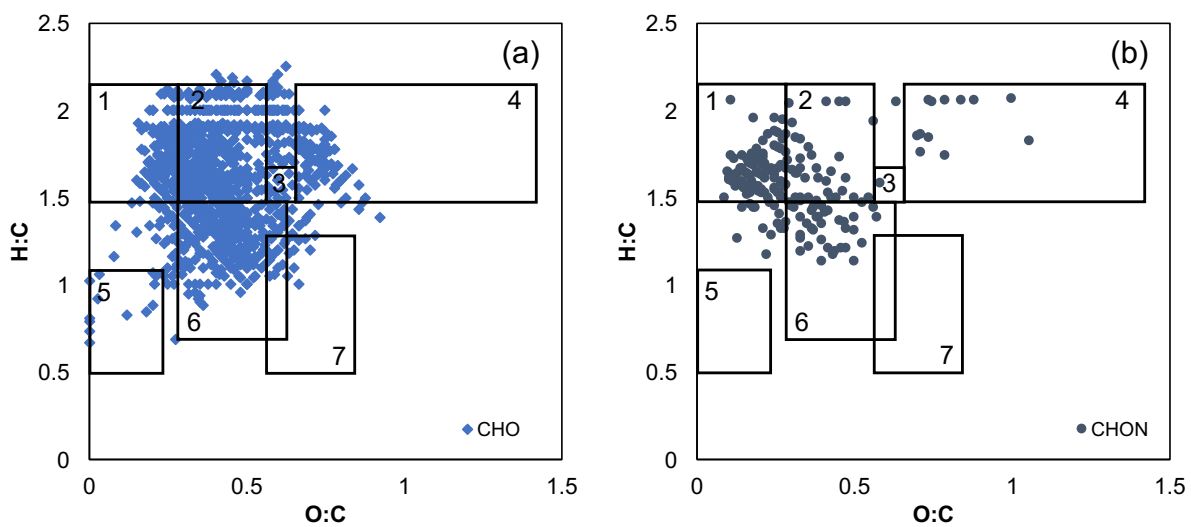

**Figure S20.** van Krevelen diagrams for (a) CHO and (b) CHON formulas in the Nine Springs Ostara influent determined using positive mode FT-ICR MS.

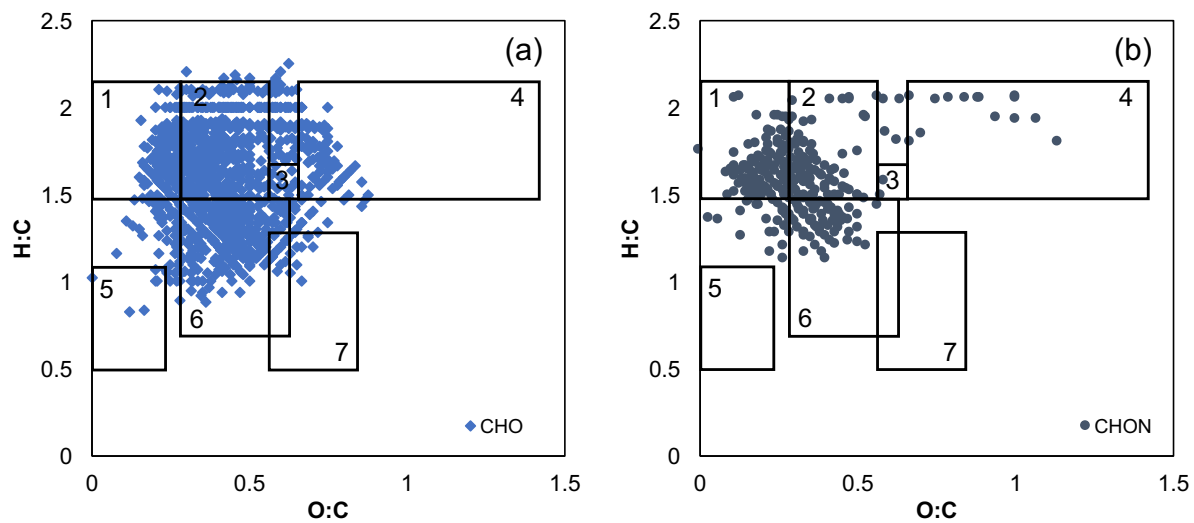

**Figure S21.** van Krevelen diagrams for (a) CHO and (b) CHON formulas in the Nine Springs Ostara effluent determined using positive mode FT-ICR MS.

#### S4. Comparison of ESI polarity

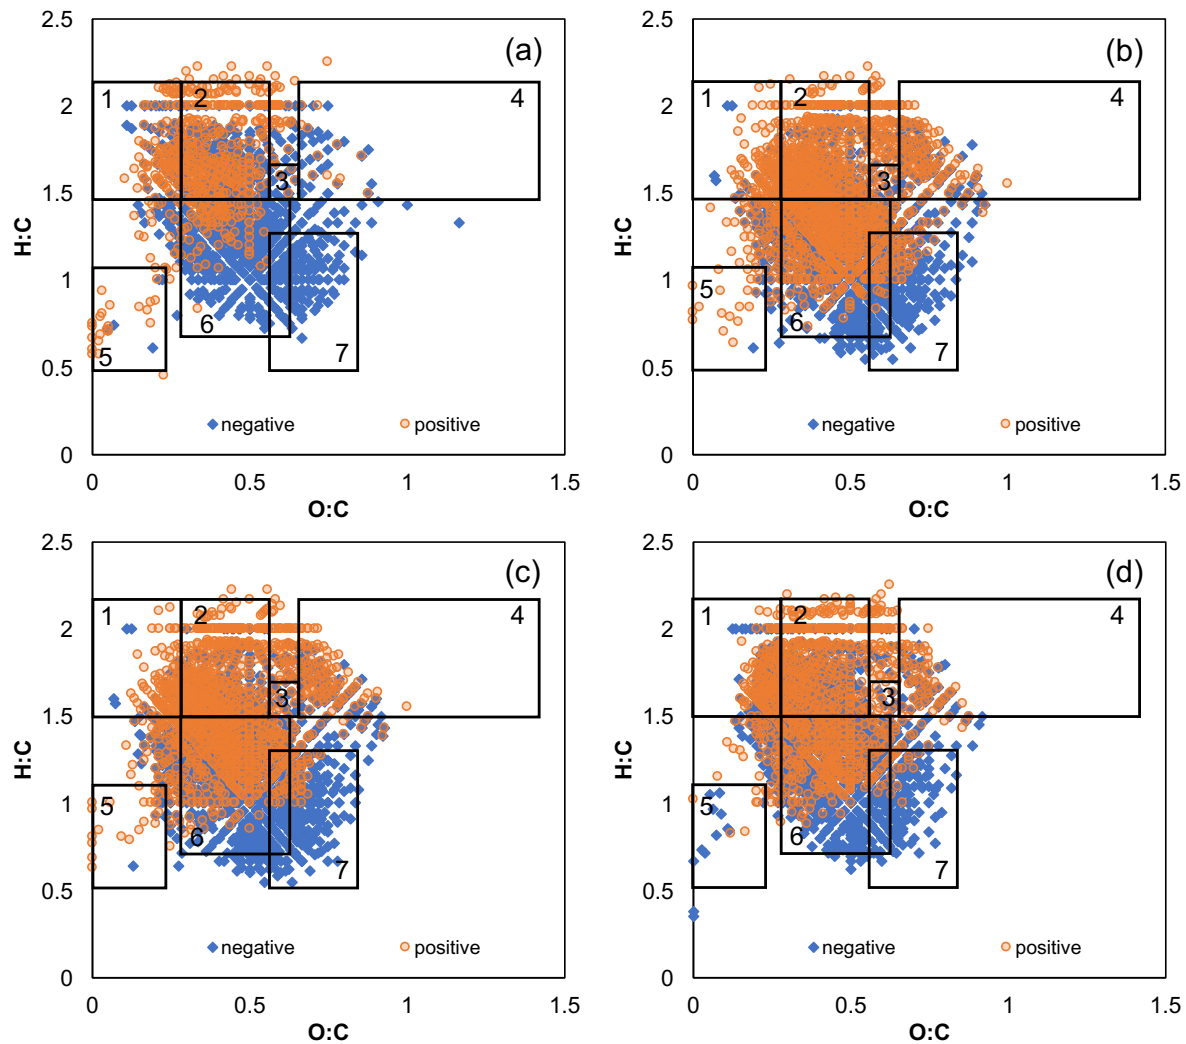

**Figure S22.** Representative van Krevelen diagrams showing CHO formulas for (a) primary effluent, (b) UCT secondary clarifier effluent, (c) final effluent, and (d) Ostara effluent samples determined using negative mode and positive mode FT-ICR MS.

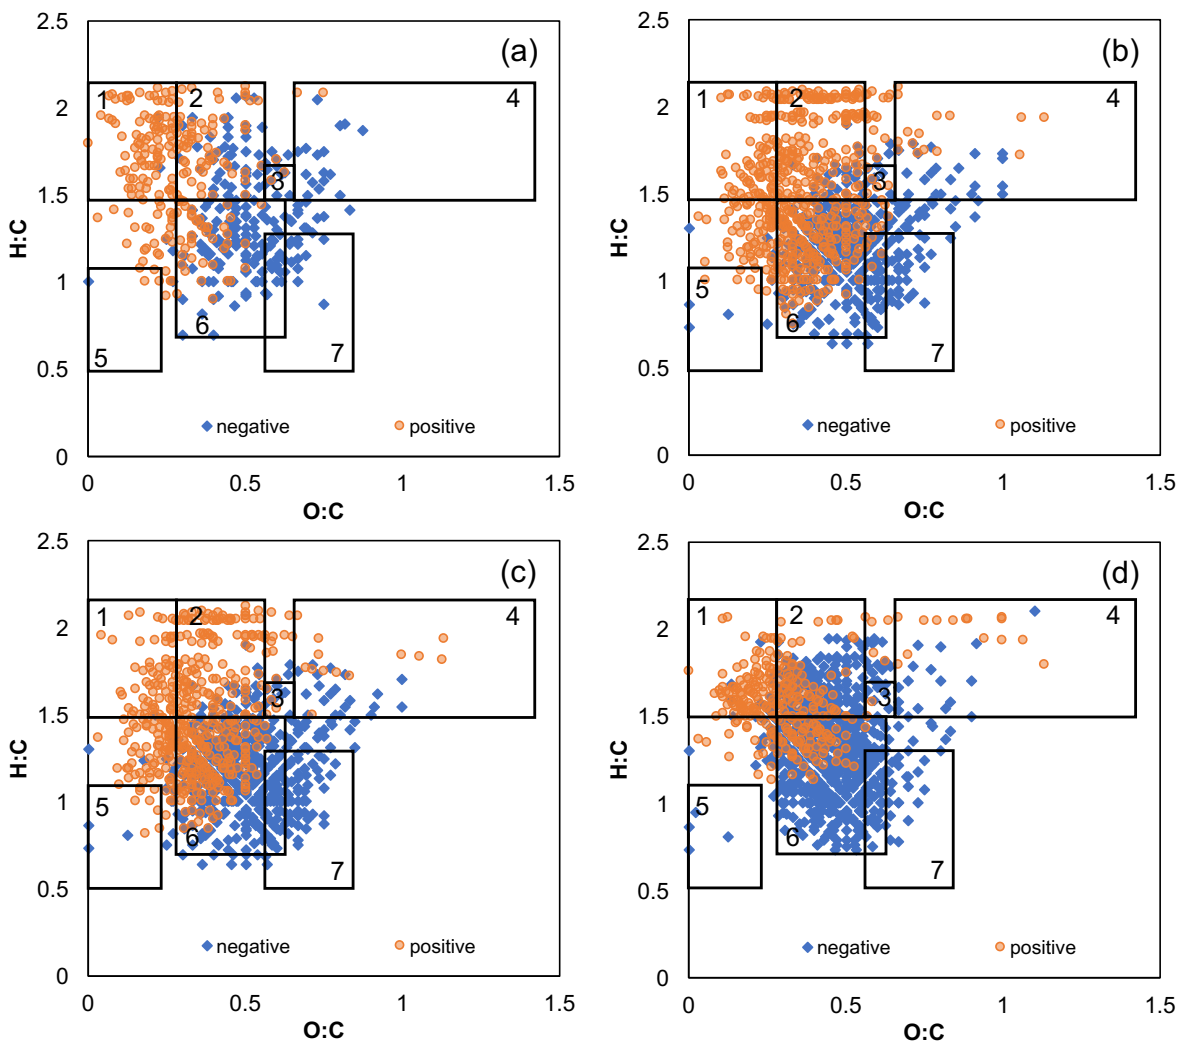

**Figure S23.** Representative van Krevelen diagrams showing CHON formulas for (a) primary effluent, (b) UCT secondary clarifier effluent, (c) final effluent, and (d) Ostara effluent samples determined using negative mode and positive mode FT-ICR MS.

## S5. Process comparison

### *Primary effluent vs. A/O secondary effluent*

**Table S6.** The number, H:C, O:C, and DBE of formulas that were only present in primary effluent or had increased relative intensity in primary effluent compared to A/O secondary effluent as determined using FT-ICR MS in negative mode.

| Formula |                             | n   | H:C  | O:C  | DBE  |                             | n   | H:C  | O:C  | DBE  |
|---------|-----------------------------|-----|------|------|------|-----------------------------|-----|------|------|------|
| CHO     | Only in primary eff.        | 139 | 1.60 | 0.40 | 5.21 | Only in A/O effluent        | 616 | 1.17 | 0.54 | 9.36 |
|         | Increased I in primary eff. | 152 | 1.61 | 0.42 | 4.07 | Increased I in A/O effluent | 662 | 1.22 | 0.50 | 7.91 |
| CHON    | Only in primary eff.        | 49  | 1.61 | 0.48 | 4.33 | Only in A/O effluent        | 372 | 1.16 | 0.54 | 9.22 |
|         | Increased I in primary eff. | 41  | 1.48 | 0.52 | 4.34 | Increased I in A/O effluent | 122 | 1.24 | 0.53 | 7.05 |
| CHOS    | Only in primary eff.        | 298 | 1.74 | 0.45 | 3.86 | Only in A/O effluent        | 267 | 1.16 | 0.54 | 8.00 |
|         | Increased I in primary eff. | 176 | 1.65 | 0.43 | 3.40 | Increased I in A/O effluent | 230 | 1.38 | 0.49 | 5.34 |
| CHOP    | Only in primary eff.        | 81  | 1.77 | 0.65 | 3.16 | Only in A/O effluent        | 130 | 1.49 | 0.76 | 5.56 |
|         | Increased I in primary eff. | 29  | 1.92 | 0.65 | 2.17 | Increased I in A/O effluent | 70  | 1.62 | 0.66 | 4.49 |
| CHOCl   | Only in primary eff.        | 104 | 1.71 | 0.31 | 2.55 | Only in A/O effluent        | 55  | 1.38 | 0.38 | 5.25 |
|         | Increased I in primary eff. | 37  | 1.65 | 0.37 | 2.32 | Increased I in A/O effluent | 37  | 1.47 | 0.37 | 4.22 |

**Table S7.** The number, H:C, O:C, and DBE of formulas that were only present in primary effluent or had increased relative intensity in primary effluent compared to A/O secondary effluent as determined using FT-ICR MS in positive mode.

| Formula |                             | n   | H:C  | O:C  | DBE  |                             | n   | H:C  | O:C  | DBE  |
|---------|-----------------------------|-----|------|------|------|-----------------------------|-----|------|------|------|
| CHO     | Only in primary eff.        | 289 | 1.69 | 0.34 | 5.21 | Only in A/O effluent        | 741 | 1.41 | 0.50 | 6.62 |
|         | Increased I in primary eff. | 183 | 1.70 | 0.39 | 4.01 | Increased I in A/O effluent | 114 | 1.48 | 0.41 | 5.91 |
| CHON    | Only in primary eff.        | 95  | 1.45 | 0.37 | 6.66 | Only in A/O effluent        | 777 | 1.43 | 0.39 | 6.95 |
|         | Increased I in primary eff. | 61  | 1.76 | 0.31 | 3.54 | Increased I in A/O effluent | 73  | 1.44 | 0.31 | 6.22 |

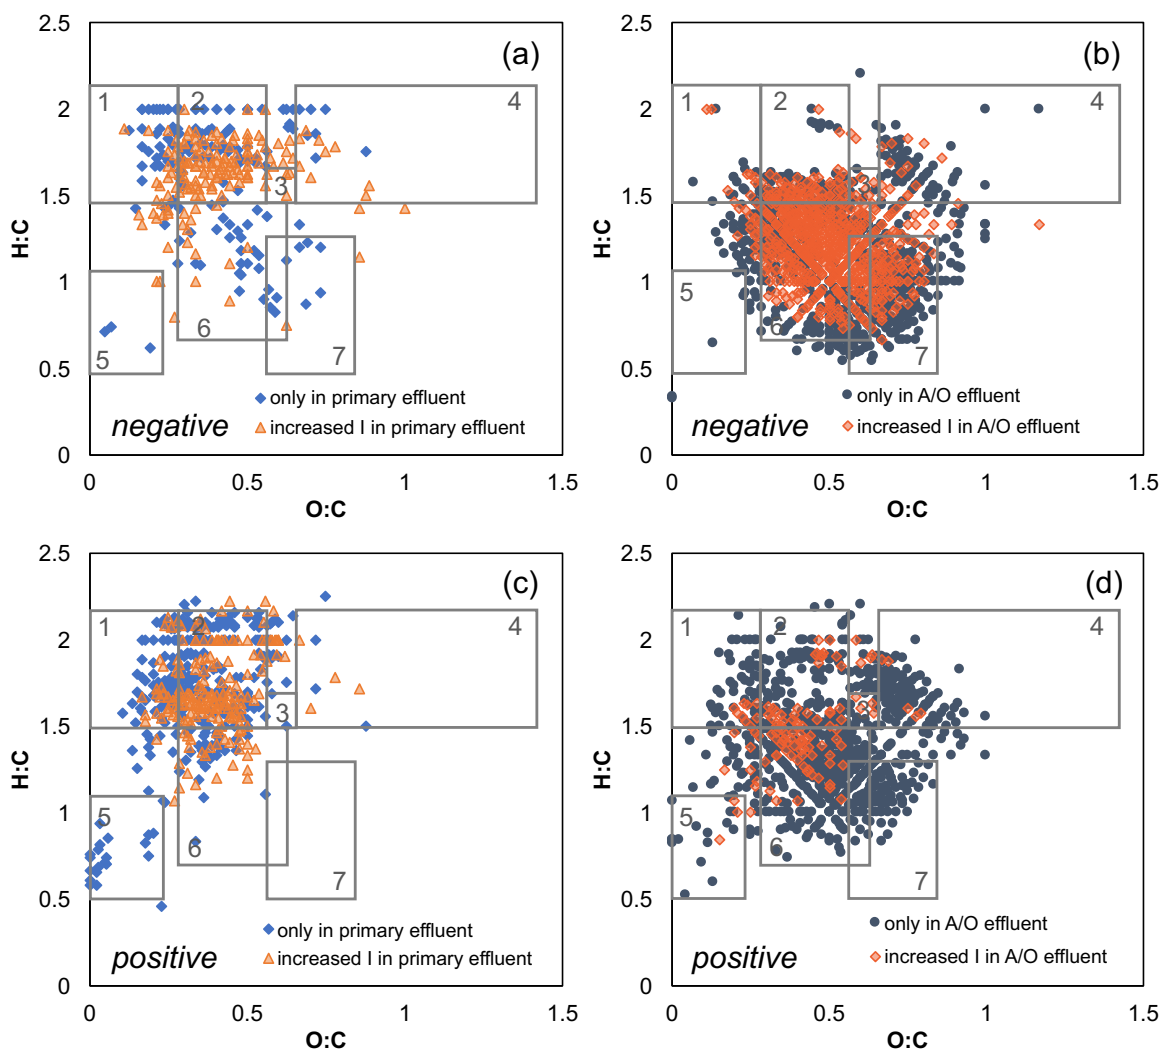

**Figure S24.** Negative and positive mode CHO formulas that were (a, c) only present in primary effluent or had increased relative intensity in primary effluent compared to A/O secondary effluent and (b, d) only present in A/O secondary effluent or had increased relative intensity in A/O secondary effluent compared to primary effluent.



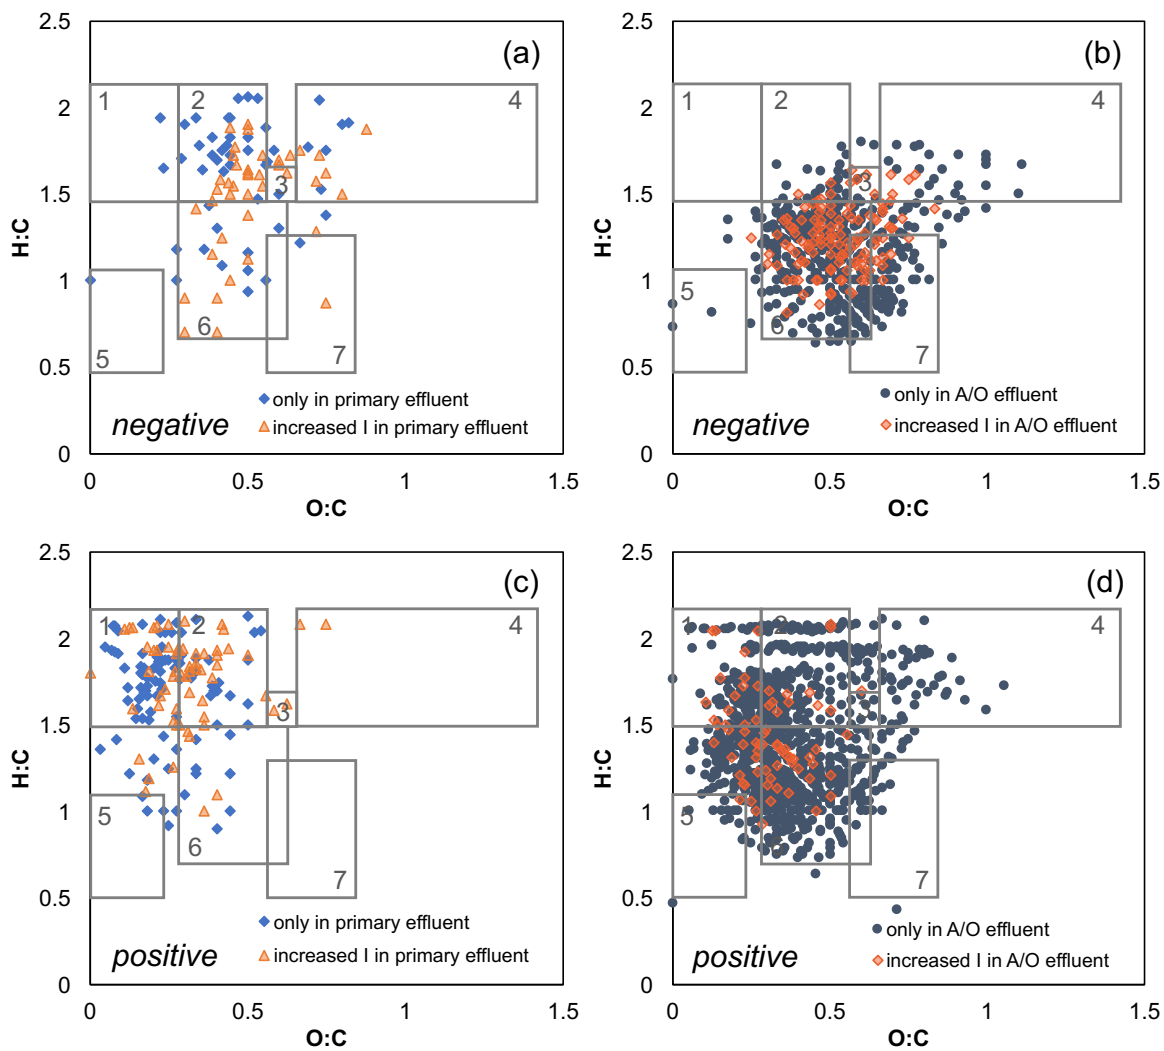

**Figure S25.** Negative and positive mode CHON formulas that were (a, c) only present in primary effluent or had increased relative intensity in primary effluent compared to A/O secondary effluent and (b, d) only present in A/O secondary effluent or had increased relative intensity in A/O secondary effluent compared to primary effluent.

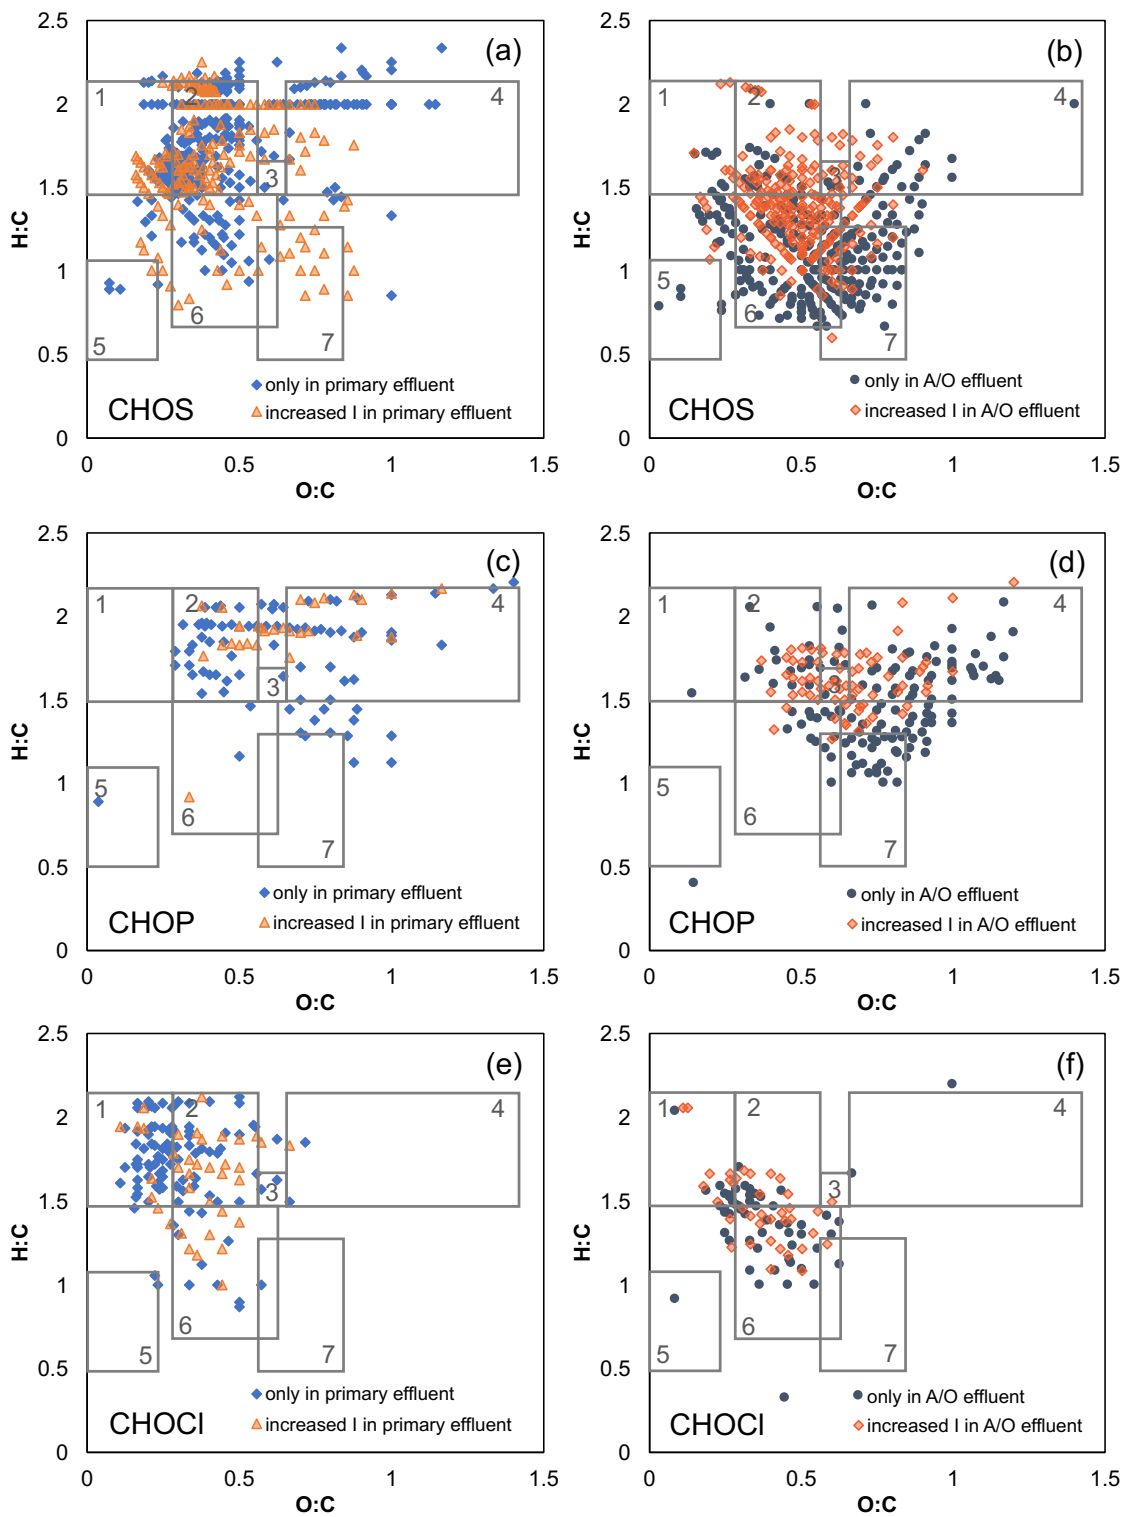

**Figure S26.** Negative mode CHOS, CHOP, and CHOCI formulas that were (a, c, e) only present in primary effluent or had increased relative intensity in primary effluent compared to A/O secondary effluent and (b, d, f) only present in A/O secondary effluent or had increased relative in intensity in A/O secondary effluent compared to primary effluent.

*Primary effluent vs. UCT secondary effluent*

**Table S8.** The number, H:C, O:C, and DBE of formulas that were only present in primary effluent or had increased relative intensity in primary effluent compared to UCT secondary effluent as determined using FT-ICR MS in negative mode.

| <b>Formula</b> |                             | <b>n</b> | <b>H:C</b> | <b>O:C</b> | <b>DBE</b> |                         | <b>n</b> | <b>H:C</b> | <b>O:C</b> | <b>DBE</b> |
|----------------|-----------------------------|----------|------------|------------|------------|-------------------------|----------|------------|------------|------------|
| <b>CHO</b>     | Only in primary eff.        | 91       | 1.65       | 0.38       | 4.95       | Only in UCT eff.        | 671      | 1.28       | 0.49       | 8.65       |
|                | Increased I in primary eff. | 148      | 1.61       | 0.42       | 3.89       | Increased I in UCT eff. | 714      | 1.25       | 0.49       | 7.78       |
| <b>CHON</b>    | Only in primary eff.        | 47       | 1.59       | 0.46       | 4.40       | Only in UCT eff.        | 380      | 1.18       | 0.50       | 9.24       |
|                | Increased I in primary eff. | 39       | 1.45       | 0.52       | 4.44       | Increased I in UCT eff. | 126      | 1.27       | 0.53       | 6.90       |
| <b>CHOS</b>    | Only in primary eff.        | 270      | 1.75       | 0.45       | 3.70       | Only in UCT eff.        | 242      | 1.21       | 0.50       | 7.74       |
|                | Increased I in primary eff. | 185      | 1.65       | 0.42       | 3.54       | Increased I in UCT eff. | 219      | 1.39       | 0.50       | 5.31       |
| <b>CHOP</b>    | Only in primary eff.        | 171      | 1.75       | 0.66       | 3.41       | Only in UCT eff.        | 23       | 1.60       | 0.62       | 5.87       |
|                | Increased I in primary eff. | 5        | 1.63       | 0.56       | 4.80       | Increased I in UCT eff. | 4        | 1.35       | 0.54       | 6.50       |
| <b>CHOCI</b>   | Only in primary eff.        | 82       | 1.66       | 0.31       | 2.84       | Only in UCT eff.        | 131      | 1.53       | 0.42       | 3.87       |
|                | Increased I in primary eff. | 47       | 1.75       | 0.35       | 1.96       | Increased I in UCT eff. | 47       | 1.53       | 0.36       | 3.71       |

**Table S9.** The number, H:C, O:C, and DBE of formulas that were only present in primary effluent or had increased relative intensity in primary effluent compared to UCT secondary effluent as determined using FT-ICR MS in positive mode.

| <b>Formula</b> |                             | <b>n</b> | <b>H:C</b> | <b>O:C</b> | <b>DBE</b> |                         | <b>n</b> | <b>H:C</b> | <b>O:C</b> | <b>DBE</b> |
|----------------|-----------------------------|----------|------------|------------|------------|-------------------------|----------|------------|------------|------------|
| <b>CHO</b>     | Only in primary eff.        | 312      | 1.67       | 0.36       | 5.54       | Only in UCT eff.        | 560      | 1.34       | 0.42       | 7.55       |
|                | Increased I in primary eff. | 119      | 1.76       | 0.37       | 3.35       | Increased I in UCT eff. | 155      | 1.55       | 0.41       | 5.06       |
| <b>CHON</b>    | Only in primary eff.        | 120      | 1.75       | 0.26       | 4.30       | Only in UCT eff.        | 242      | 1.44       | 0.37       | 5.63       |
|                | Increased I in primary eff. | 29       | 1.65       | 0.32       | 3.79       | Increased I in UCT eff. | 80       | 1.43       | 0.31       | 5.58       |

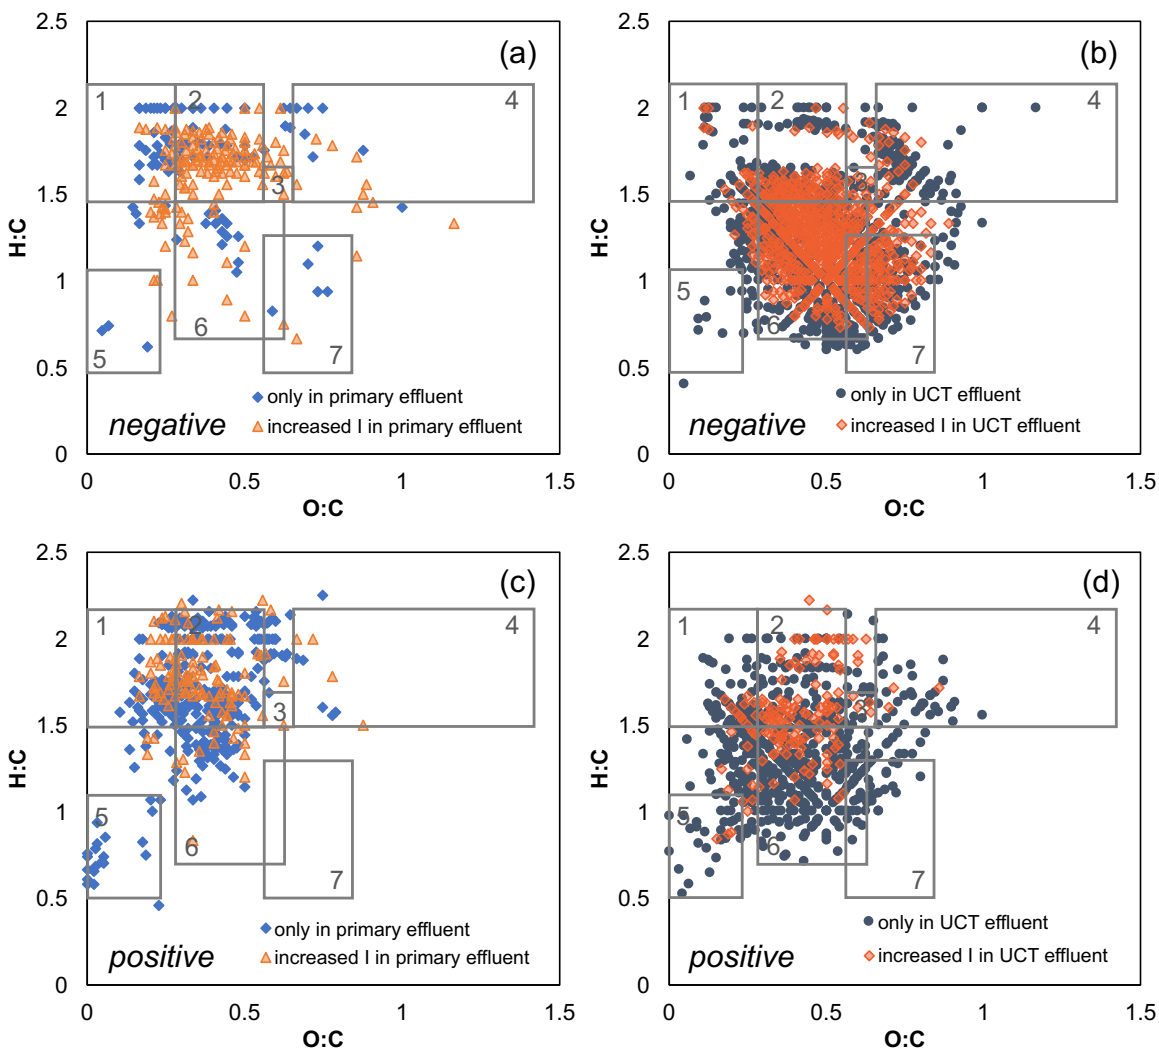

**Figure S27.** Negative and positive mode CHO formulas that were (a, c) only present in primary effluent or had increased relative intensity in primary effluent compared to UCT secondary effluent and (b, d) only present in UCT secondary effluent or had increased relative intensity in UCT secondary effluent compared to primary effluent.

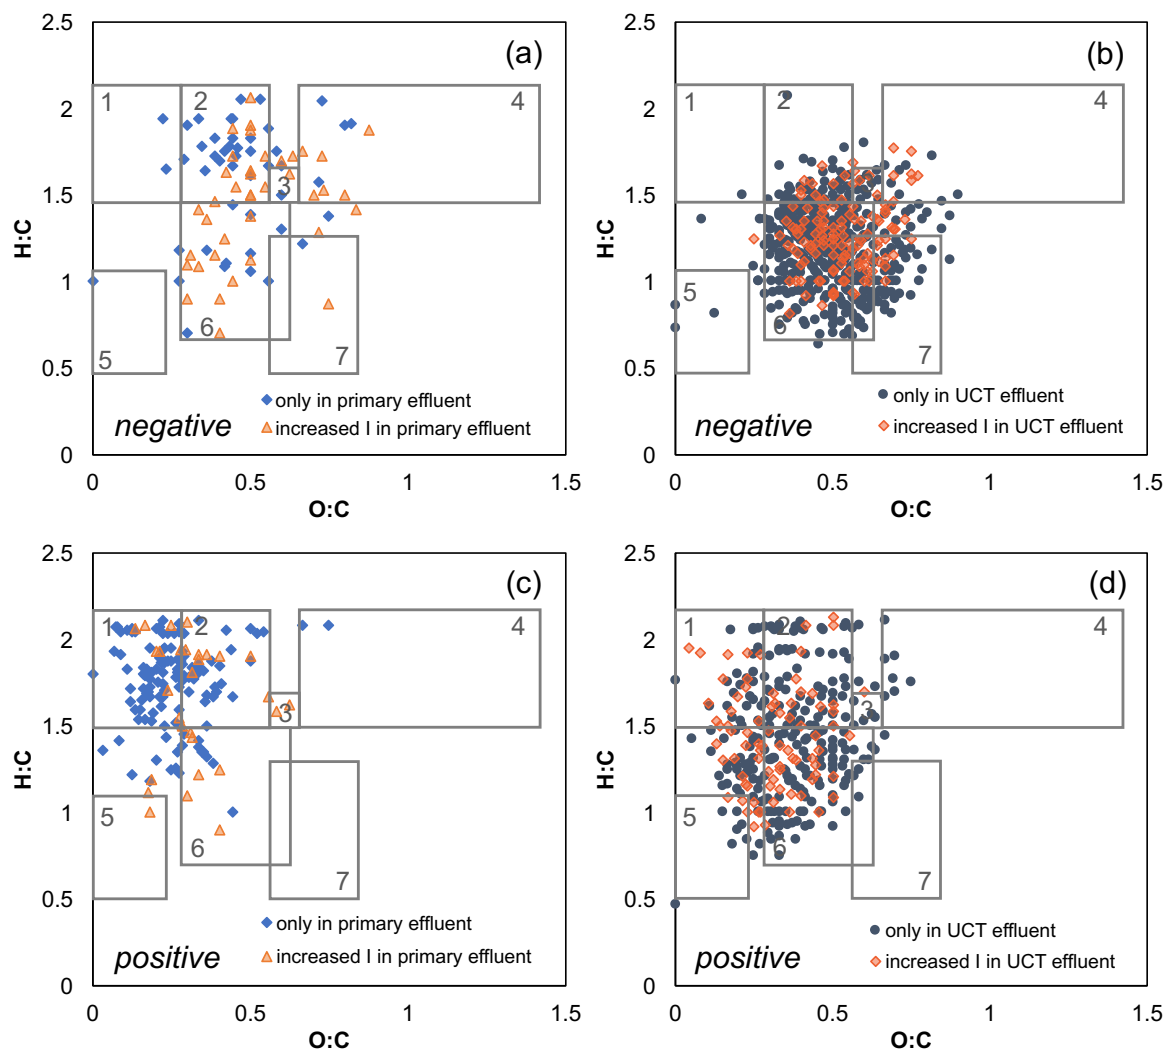

**Figure S28.** Negative and positive mode CHON formulas that were (a, c) only present in primary effluent or had increased relative intensity in primary effluent compared to UCT secondary effluent and (b, d) only present in UCT secondary effluent or had increased relative intensity in UCT secondary effluent compared to primary effluent.

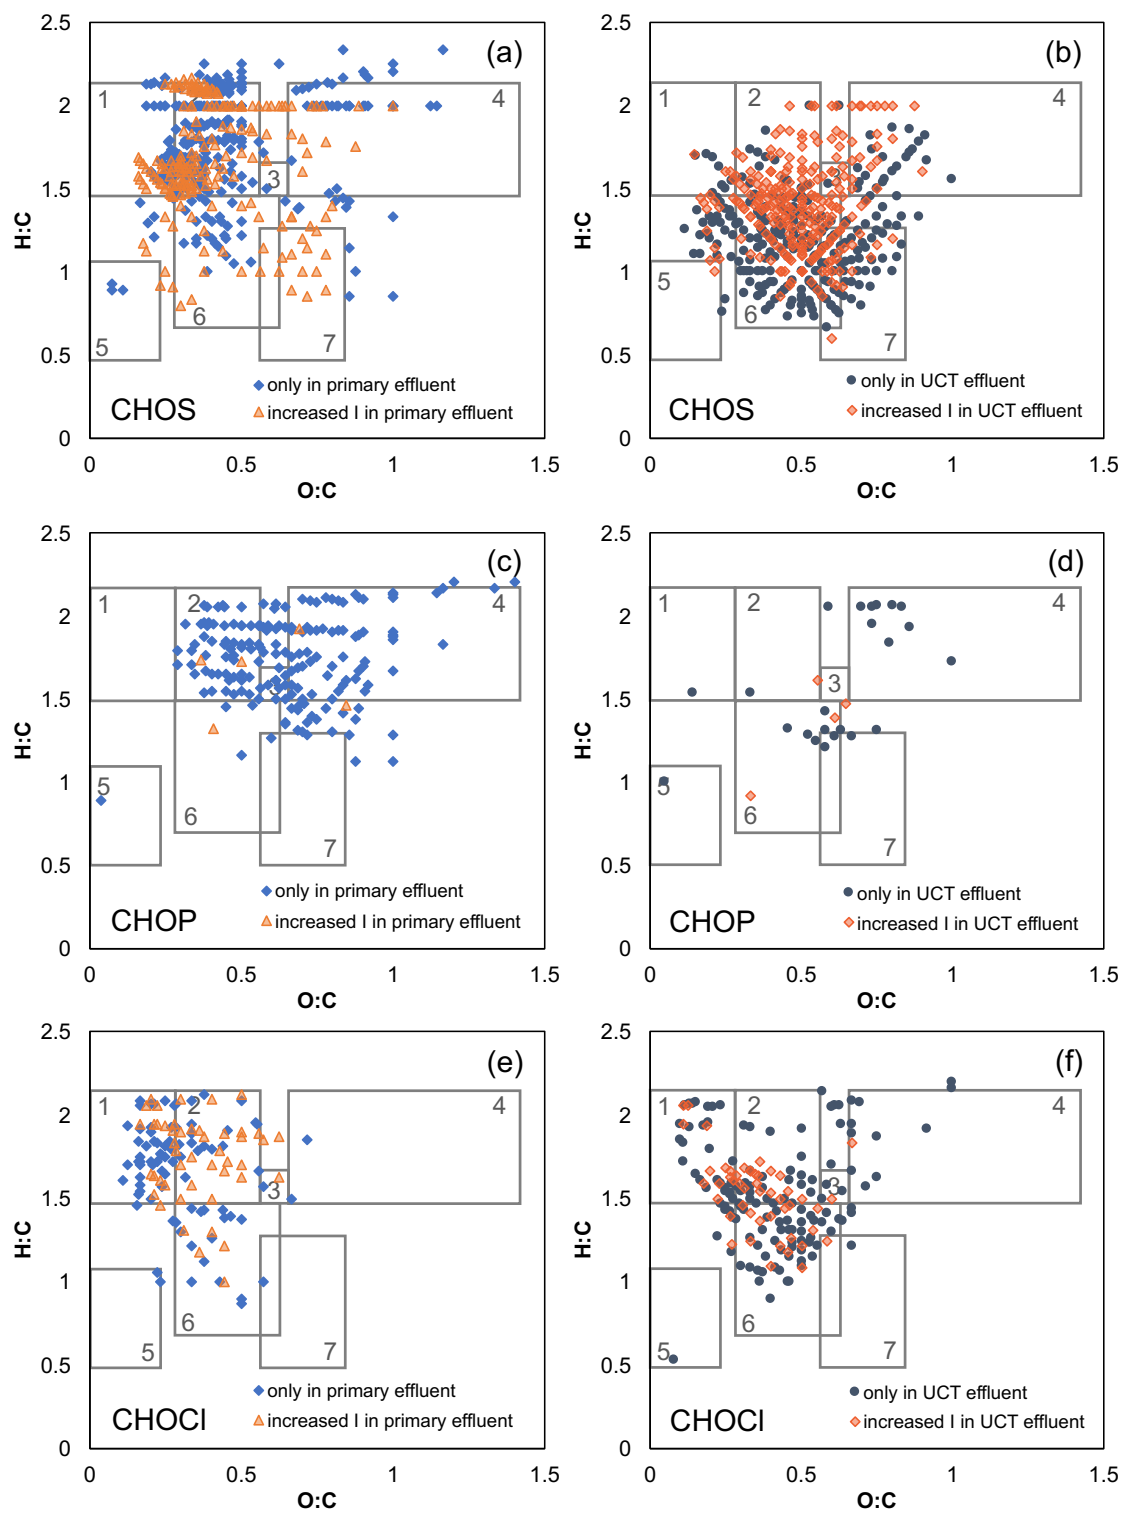

**Figure S29.** Negative mode CHOS, CHOP, and CHOCI formulas that were (a, c, e) only present in primary effluent or had increased relative intensity in primary effluent compared to UCT secondary effluent and (b, d, f) only present in UCT secondary effluent or had increased relative in intensity in UCT secondary effluent compared to primary effluent.

*A/O secondary effluent vs. UCT secondary effluent*

**Table S10.** The number, H:C, O:C, and DBE of formulas that were only present in A/O secondary effluent or had increased relative intensity in A/O secondary effluent compared to UCT secondary effluent as determined using FT-ICR MS in negative mode.

| Formula      |                    | n   | H:C  | O:C  | DBE   |                    | n   | H:C  | O:C  | DBE  |
|--------------|--------------------|-----|------|------|-------|--------------------|-----|------|------|------|
| <b>CHO</b>   | Only in A/O        | 154 | 1.06 | 0.59 | 10.38 | Only in UCT        | 257 | 1.45 | 0.42 | 7.42 |
|              | Increased I in A/O | 697 | 1.11 | 0.55 | 8.50  | Increased I in UCT | 579 | 1.45 | 0.43 | 7.08 |
| <b>CHON</b>  | Only in A/O        | 123 | 1.20 | 0.58 | 8.88  | Only in UCT        | 133 | 1.28 | 0.48 | 8.85 |
|              | Increased I in A/O | 273 | 1.13 | 0.54 | 8.36  | Increased I in UCT | 139 | 1.35 | 0.47 | 7.87 |
| <b>CHOS</b>  | Only in A/O        | 120 | 1.26 | 0.56 | 7.45  | Only in UCT        | 124 | 1.46 | 0.47 | 6.35 |
|              | Increased I in A/O | 313 | 1.32 | 0.53 | 5.84  | Increased I in UCT | 239 | 1.48 | 0.41 | 5.15 |
| <b>CHOP</b>  | Only in A/O        | 213 | 1.60 | 0.73 | 4.66  | Only in UCT        | 16  | 1.73 | 0.64 | 4.81 |
|              | Increased I in A/O | 14  | 1.44 | 0.60 | 6.57  | Increased I in UCT | 2   | 1.23 | 0.24 | 8.00 |
| <b>CHOCI</b> | Only in A/O        | 24  | 1.37 | 0.36 | 5.54  | Only in UCT        | 122 | 1.63 | 0.40 | 3.14 |
|              | Increased I in A/O | 25  | 1.29 | 0.47 | 5.00  | Increased I in UCT | 80  | 1.58 | 0.35 | 1.58 |

**Table S11.** The number, H:C, O:C, and DBE of formulas that were only present in A/O secondary effluent or had increased relative intensity in A/O secondary effluent compared to UCT secondary effluent as determined using FT-ICR MS in positive mode.

| Formula     |                    | n   | H:C  | O:C  | DBE  |                    | n   | H:C  | O:C  | DBE  |
|-------------|--------------------|-----|------|------|------|--------------------|-----|------|------|------|
| <b>CHO</b>  | Only in A/O        | 553 | 1.49 | 0.50 | 6.38 | Only in UCT        | 349 | 1.42 | 0.35 | 7.54 |
|             | Increased I in A/O | 33  | 1.30 | 0.66 | 6.97 | Increased I in UCT | 452 | 1.46 | 0.43 | 5.65 |
| <b>CHON</b> | Only in A/O        | 656 | 1.45 | 0.38 | 7.12 | Only in UCT        | 96  | 1.47 | 0.35 | 5.34 |
|             | Increased I in A/O | 89  | 1.31 | 0.45 | 6.61 | Increased I in UCT | 166 | 1.54 | 0.31 | 4.92 |

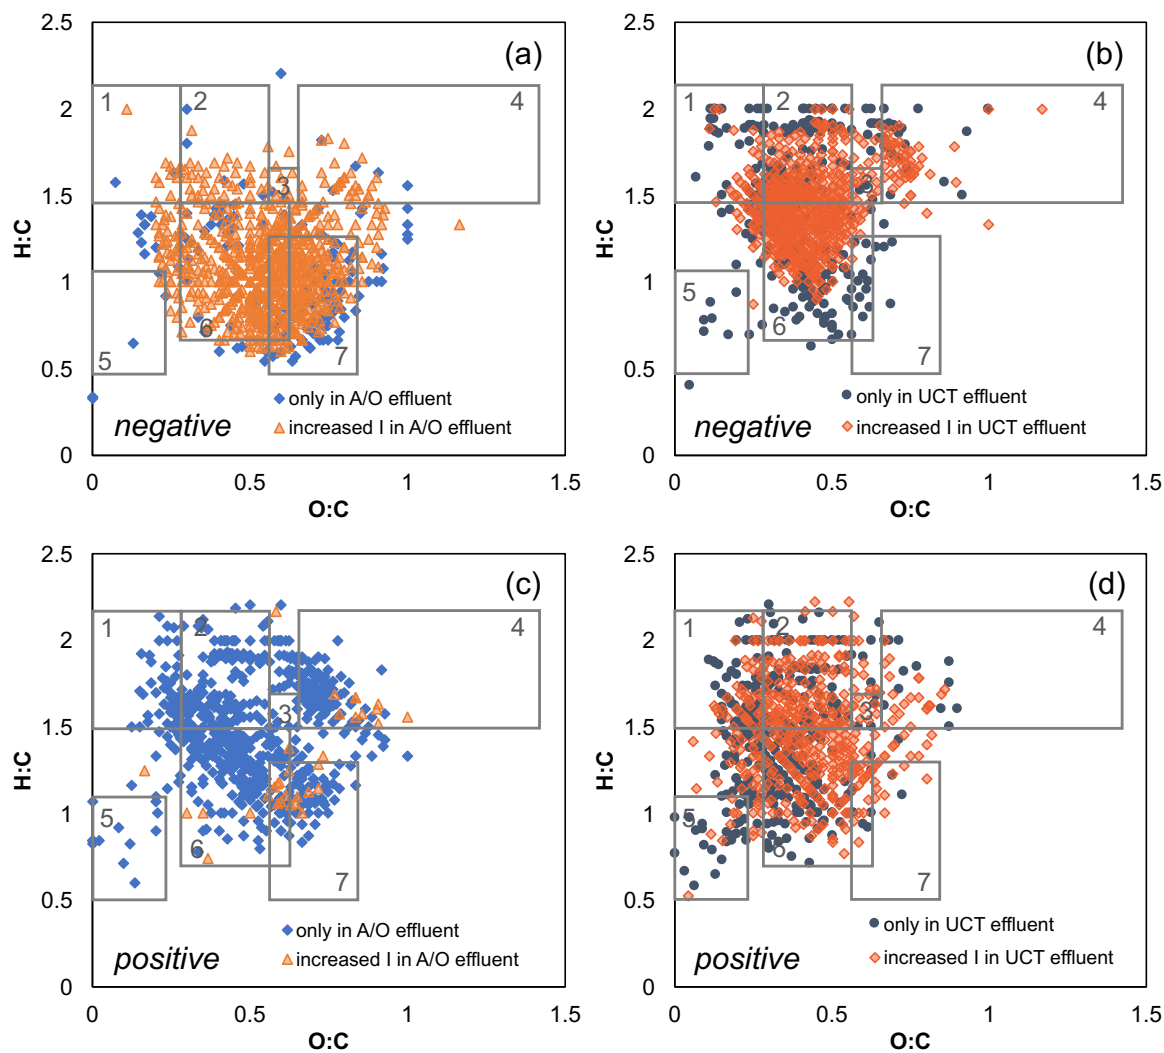

**Figure S30.** Negative and positive mode CHO formulas that were (a, c) only present in A/O secondary effluent or had increased relative intensity in A/O secondary effluent compared to UCT secondary effluent and (b, d) only present in UCT secondary effluent or had increased relative intensity in UCT secondary effluent compared to A/O secondary effluent.



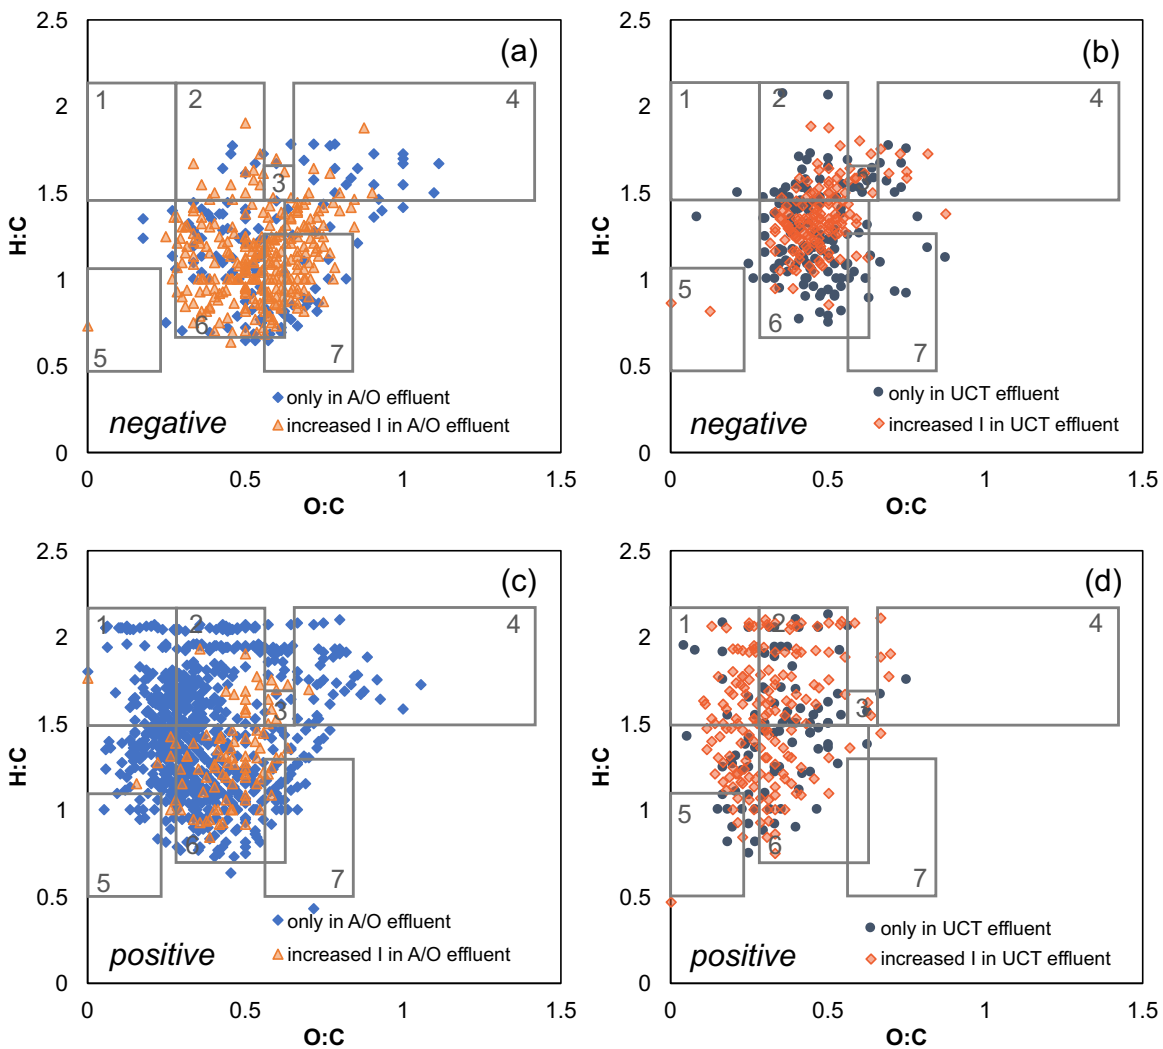

**Figure S31.** Negative and positive mode CHON formulas that were (a, c) only present in A/O secondary effluent or had increased relative intensity in A/O secondary effluent compared to UCT secondary effluent and (b, d) only present in UCT secondary effluent or had increased relative intensity in UCT secondary effluent compared to A/O secondary effluent.

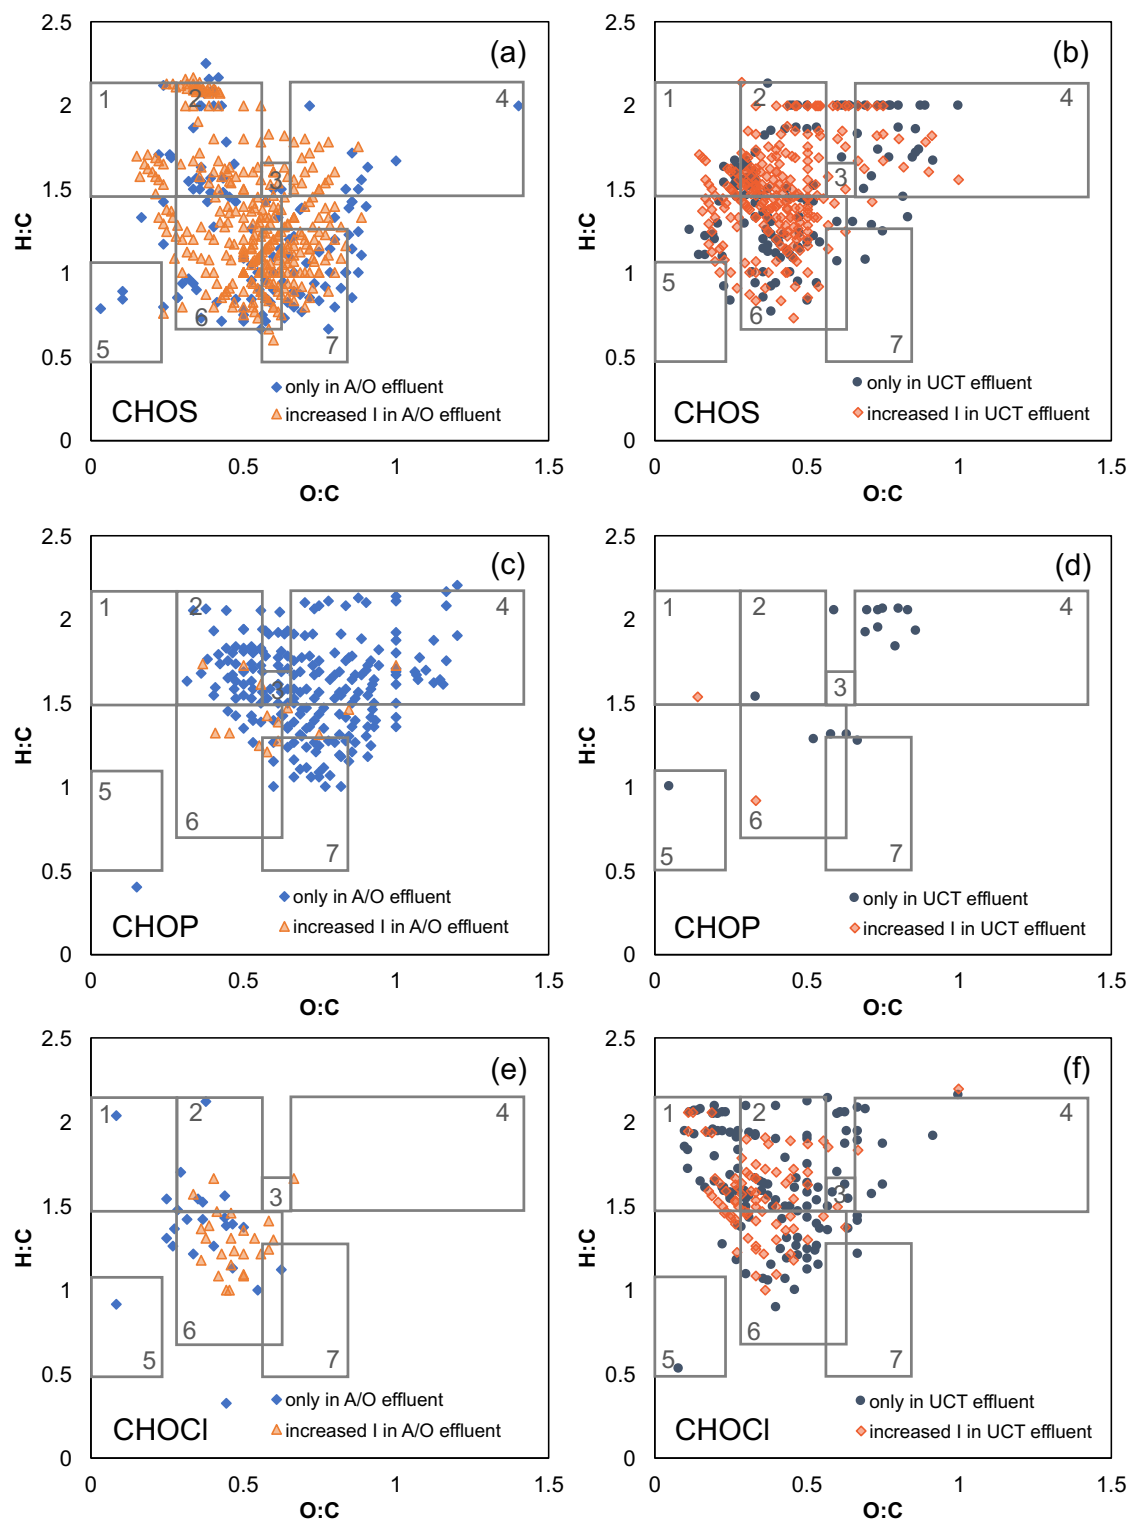

**Figure S32.** Negative mode CHOS, CHOP, and CHOCI formulas that were (a, c, e) only present in A/O secondary effluent or had increased relative intensity in A/O secondary effluent compared to UCT secondary effluent and (b, d, f) only present in UCT secondary effluent or had increased relative intensity in UCT secondary effluent compared to A/O secondary effluent.

*A/O secondary effluent vs. A/O secondary clarifier effluent*

**Table S12.** The number, H:C, O:C, and DBE of formulas that were only present in A/O secondary effluent or had increased relative intensity in A/O secondary effluent compared to A/O secondary clarifier effluent as determined using FT-ICR MS in negative mode.

| Formula      |                               | n   | H:C  | O:C  | DBE  |                               | n    | H:C  | O:C  | DBE   |
|--------------|-------------------------------|-----|------|------|------|-------------------------------|------|------|------|-------|
| <b>CHO</b>   | Only in secondary eff.        | 238 | 1.29 | 0.55 | 6.68 | Only in clarifier eff.        | 173  | 1.15 | 0.40 | 11.59 |
|              | Increased I in secondary eff. | 155 | 1.27 | 0.66 | 5.49 | Increased I in clarifier eff. | 1037 | 1.23 | 0.48 | 8.85  |
| <b>CHON</b>  | Only in secondary eff.        | 162 | 1.21 | 0.55 | 8.33 | Only in clarifier eff.        | 97   | 1.17 | 0.47 | 10.80 |
|              | Increased I in secondary eff. | 117 | 1.30 | 0.63 | 6.07 | Increased I in clarifier eff. | 256  | 1.15 | 0.48 | 9.41  |
| <b>CHOS</b>  | Only in secondary eff.        | 186 | 1.49 | 0.51 | 4.69 | Only in clarifier eff.        | 135  | 1.27 | 0.41 | 9.05  |
|              | Increased I in secondary eff. | 90  | 1.36 | 0.59 | 4.67 | Increased I in clarifier eff. | 396  | 1.31 | 0.46 | 6.72  |
| <b>CHOP</b>  | Only in secondary eff.        | 48  | 1.65 | 0.78 | 4.50 | Only in clarifier eff.        | 40   | 1.41 | 0.52 | 7.33  |
|              | Increased I in secondary eff. | 121 | 1.55 | 0.73 | 4.88 | Increased I in clarifier eff. | 60   | 1.59 | 0.62 | 4.88  |
| <b>CHOCI</b> | Only in secondary eff.        | 69  | 1.52 | 0.38 | 4.03 | Only in clarifier eff.        | 16   | 1.33 | 0.38 | 4.75  |
|              | Increased I in secondary eff. | 33  | 1.48 | 0.38 | 3.88 | Increased I in clarifier eff. | 27   | 1.39 | 0.36 | 4.63  |

**Table S13.** The number, H:C, O:C, and DBE of formulas that were only present in A/O secondary effluent or had increased relative intensity in A/O secondary effluent compared to A/O secondary clarifier effluent as determined using FT-ICR MS in positive mode.

| Formula     |                               | n   | H:C  | O:C  | DBE  |                               | n   | H:C  | O:C  | DBE  |
|-------------|-------------------------------|-----|------|------|------|-------------------------------|-----|------|------|------|
| <b>CHO</b>  | Only in secondary eff.        | 194 | 1.41 | 0.46 | 6.76 | Only in clarifier eff.        | 352 | 1.44 | 0.42 | 7.45 |
|             | Increased I in secondary eff. | 179 | 1.36 | 0.59 | 6.37 | Increased I in clarifier eff. | 665 | 1.52 | 0.45 | 5.80 |
| <b>CHON</b> | Only in secondary eff.        | 421 | 1.44 | 0.39 | 6.83 | Only in clarifier eff.        | 118 | 1.57 | 0.41 | 6.15 |
|             | Increased I in secondary eff. | 422 | 1.42 | 0.36 | 6.75 | Increased I in clarifier eff. | 68  | 1.67 | 0.39 | 5.15 |

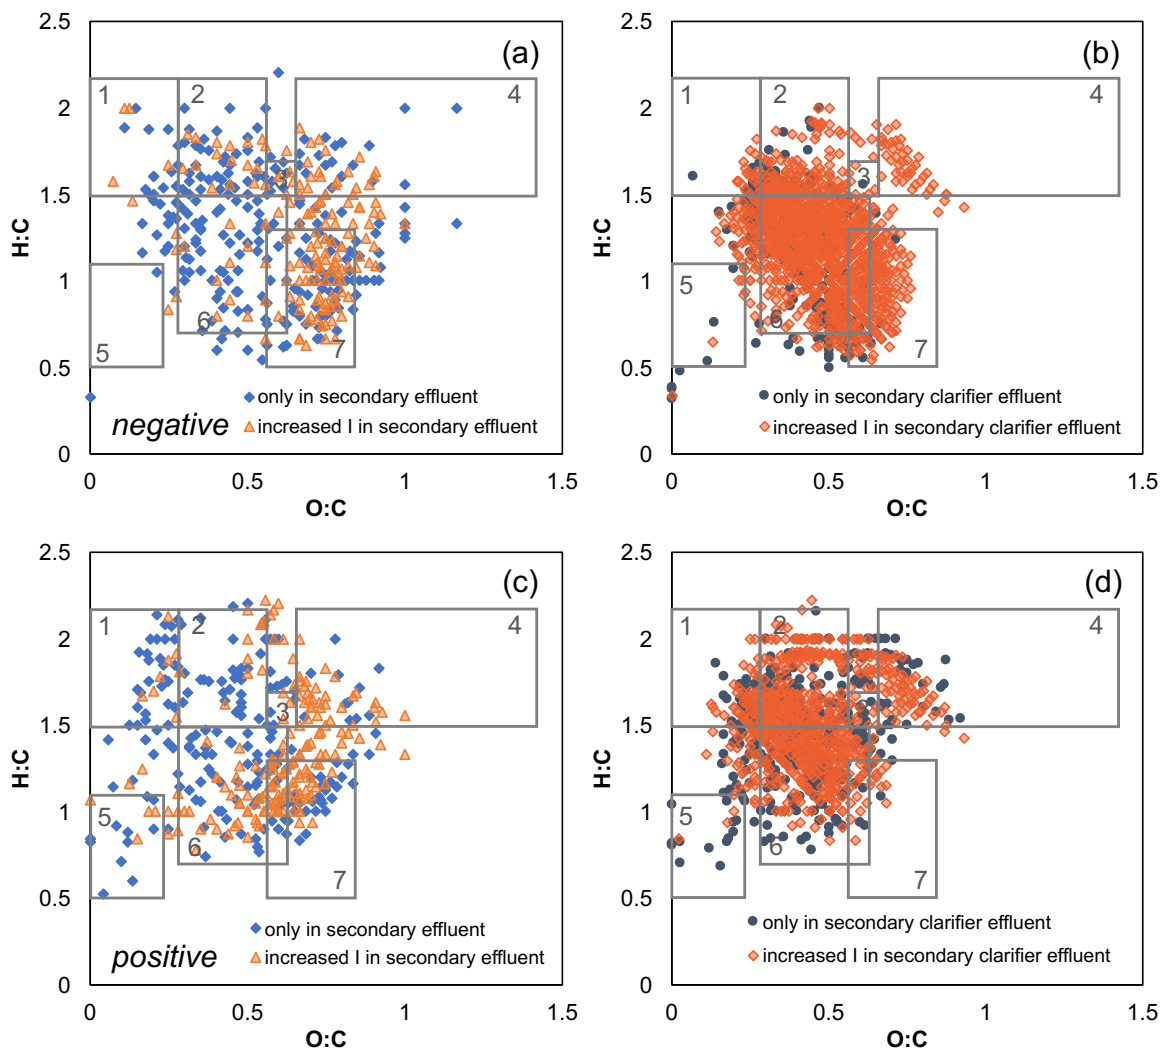

**Figure S33.** Negative and positive mode CHO formulas that were (a, c) only present in A/O secondary effluent or had increased relative intensity in A/O secondary effluent compared to A/O secondary clarifier effluent and (b, d) only present in A/O secondary clarifier effluent or had increased relative intensity in A/O secondary clarifier effluent compared to A/O secondary effluent.

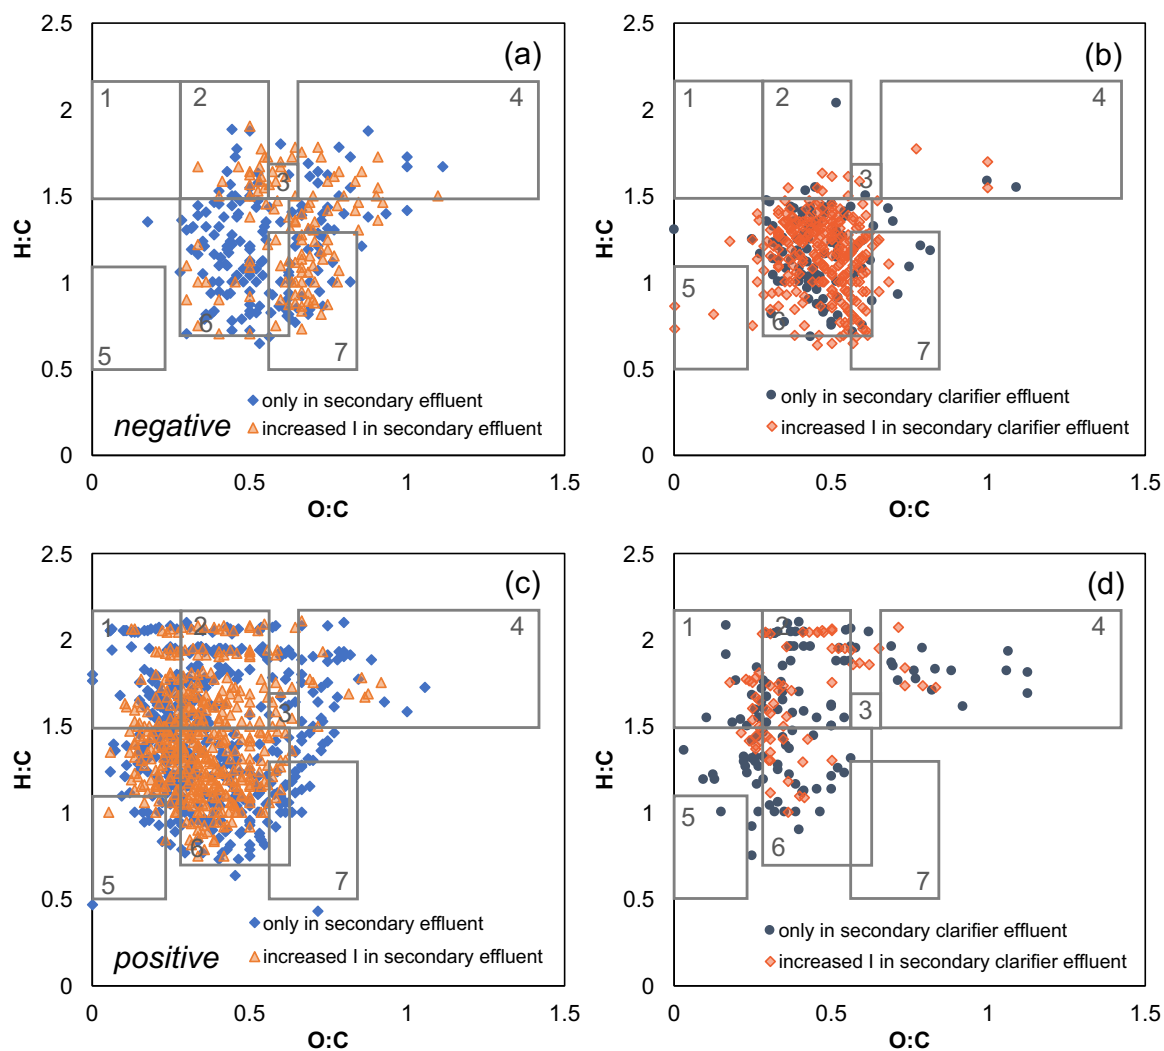

**Figure S34.** Negative and positive mode CHON formulas that were (a, c) only present in A/O secondary effluent or had increased relative intensity in A/O secondary effluent compared to A/O secondary clarifier effluent and (b, d) only present in A/O secondary clarifier effluent or had increased relative intensity in A/O secondary clarifier effluent compared to A/O secondary effluent.

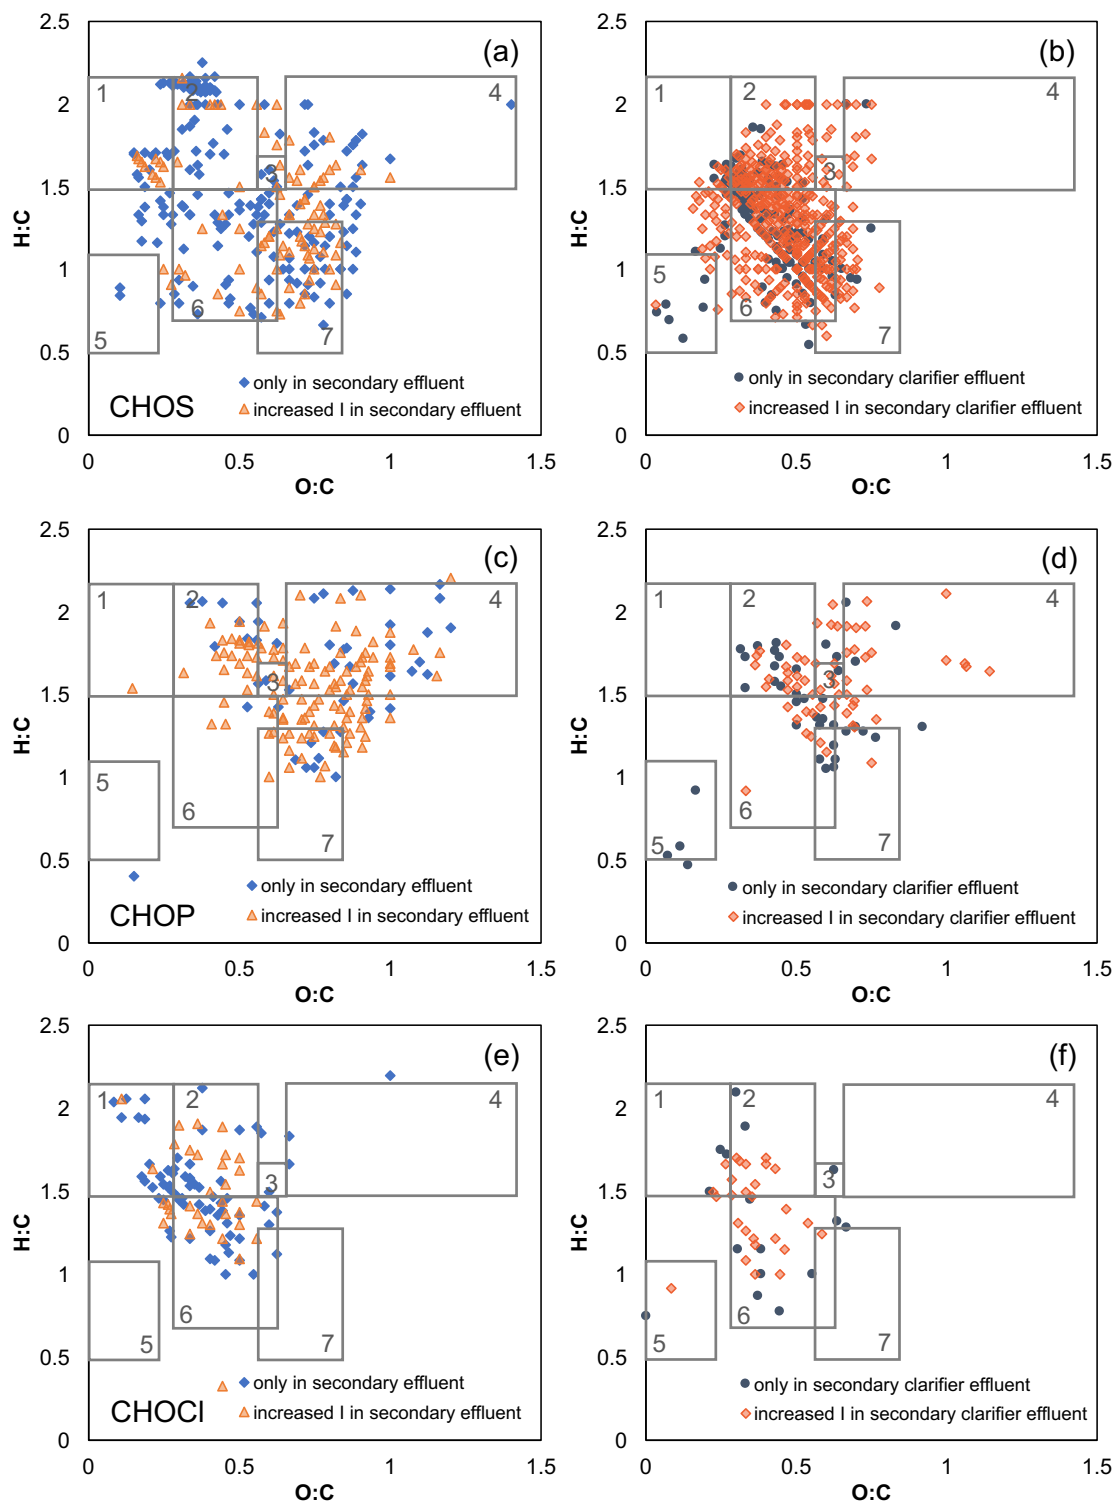

**Figure S35.** Negative mode CHOS, CHOP, and CHOCI formulas that were (a, c, e) only present in A/O secondary effluent or had increased relative intensity in A/O secondary effluent compared to A/O secondary clarifier effluent and (b, d, f) only present in A/O secondary clarifier effluent or had increased relative in intensity in A/O secondary clarifier effluent compared to A/O secondary effluent.

*UCT secondary effluent vs. UCT secondary clarifier effluent*

**Table S14.** The number, H:C, O:C, and DBE of formulas that were only present in UCT secondary effluent or had increased relative intensity in UCT secondary effluent compared to UCT secondary clarifier effluent as determined using FT-ICR MS in negative mode.

| Formula      |                               | n   | H:C  | O:C  | DBE  |                               | n   | H:C  | O:C  | DBE   |
|--------------|-------------------------------|-----|------|------|------|-------------------------------|-----|------|------|-------|
| <b>CHO</b>   | Only in secondary eff.        | 287 | 1.39 | 0.47 | 7.32 | Only in clarifier eff.        | 48  | 1.09 | 0.41 | 10.67 |
|              | Increased I in secondary eff. | 455 | 1.44 | 0.55 | 6.62 | Increased I in clarifier eff. | 791 | 1.18 | 0.45 | 8.62  |
| <b>CHON</b>  | Only in secondary eff.        | 192 | 1.29 | 0.52 | 8.39 | Only in clarifier eff.        | 61  | 1.30 | 0.56 | 7.92  |
|              | Increased I in secondary eff. | 192 | 1.26 | 0.56 | 8.09 | Increased I in clarifier eff. | 161 | 1.10 | 0.44 | 8.64  |
| <b>CHOS</b>  | Only in secondary eff.        | 136 | 1.48 | 0.48 | 5.60 | Only in clarifier eff.        | 89  | 1.29 | 0.43 | 8.66  |
|              | Increased I in secondary eff. | 102 | 1.45 | 0.53 | 5.03 | Increased I in clarifier eff. | 438 | 1.36 | 0.47 | 5.88  |
| <b>CHOP</b>  | Only in secondary eff.        | 12  | 1.73 | 0.66 | 5.00 | Only in clarifier eff.        | 197 | 1.59 | 0.66 | 4.83  |
|              | Increased I in secondary eff. | 1   | 1.54 | 0.33 | 7.00 | Increased I in clarifier eff. | 19  | 1.48 | 0.58 | 6.21  |
| <b>CHOCI</b> | Only in secondary eff.        | 135 | 1.63 | 0.40 | 3.21 | Only in clarifier eff.        | 22  | 1.35 | 0.41 | 5.73  |
|              | Increased I in secondary eff. | 64  | 1.58 | 0.37 | 3.16 | Increased I in clarifier eff. | 28  | 1.32 | 0.39 | 5.18  |

**Table S15.** The number, H:C, O:C, and DBE of formulas that were only present in UCT secondary effluent or had increased relative intensity in UCT secondary effluent compared to UCT secondary clarifier effluent as determined using FT-ICR MS in positive mode.

| Formula     |                               | n   | H:C  | O:C  | DBE  |                               | n   | H:C  | O:C  | DBE  |
|-------------|-------------------------------|-----|------|------|------|-------------------------------|-----|------|------|------|
| <b>CHO</b>  | Only in secondary eff.        | 192 | 1.42 | 0.36 | 7.40 | Only in clarifier eff.        | 726 | 1.54 | 0.47 | 6.08 |
|             | Increased I in secondary eff. | 636 | 1.45 | 0.42 | 6.19 | Increased I in clarifier eff. | 6   | 1.15 | 0.51 | 9.00 |
| <b>CHON</b> | Only in secondary eff.        | 101 | 1.46 | 0.34 | 5.27 | Only in clarifier eff.        | 289 | 1.55 | 0.38 | 6.02 |
|             | Increased I in secondary eff. | 244 | 1.46 | 0.36 | 5.51 | Increased I in clarifier eff. | 6   | 1.39 | 0.44 | 6.83 |

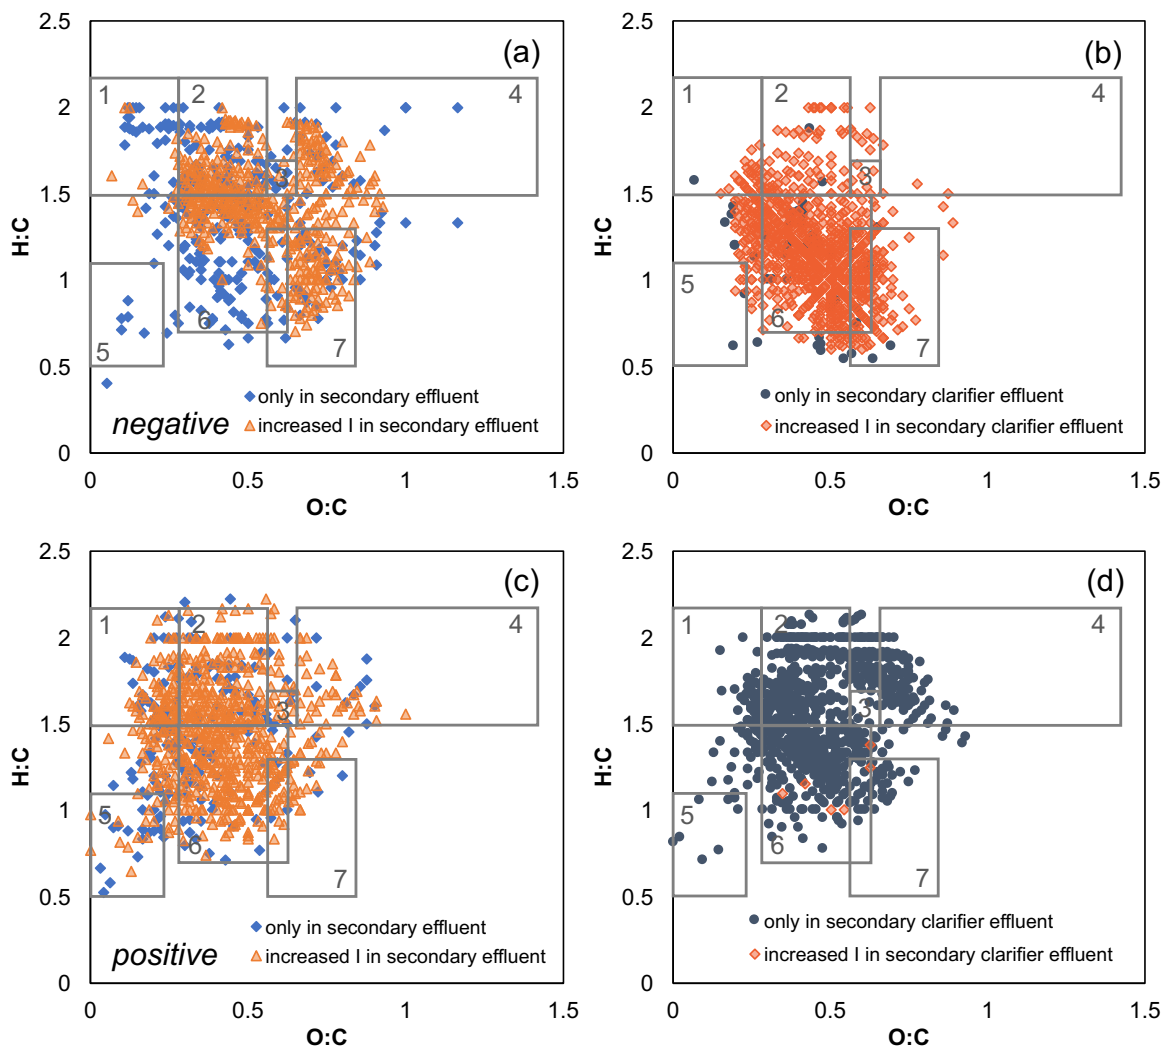

**Figure S36.** Negative and positive mode CHO formulas that were (a, c) only present in UCT secondary effluent or had increased relative intensity in UCT secondary effluent compared to UCT secondary clarifier effluent and (b, d) only present in UCT secondary clarifier effluent or had increased relative intensity in UCT secondary clarifier effluent compared to UCT secondary effluent.



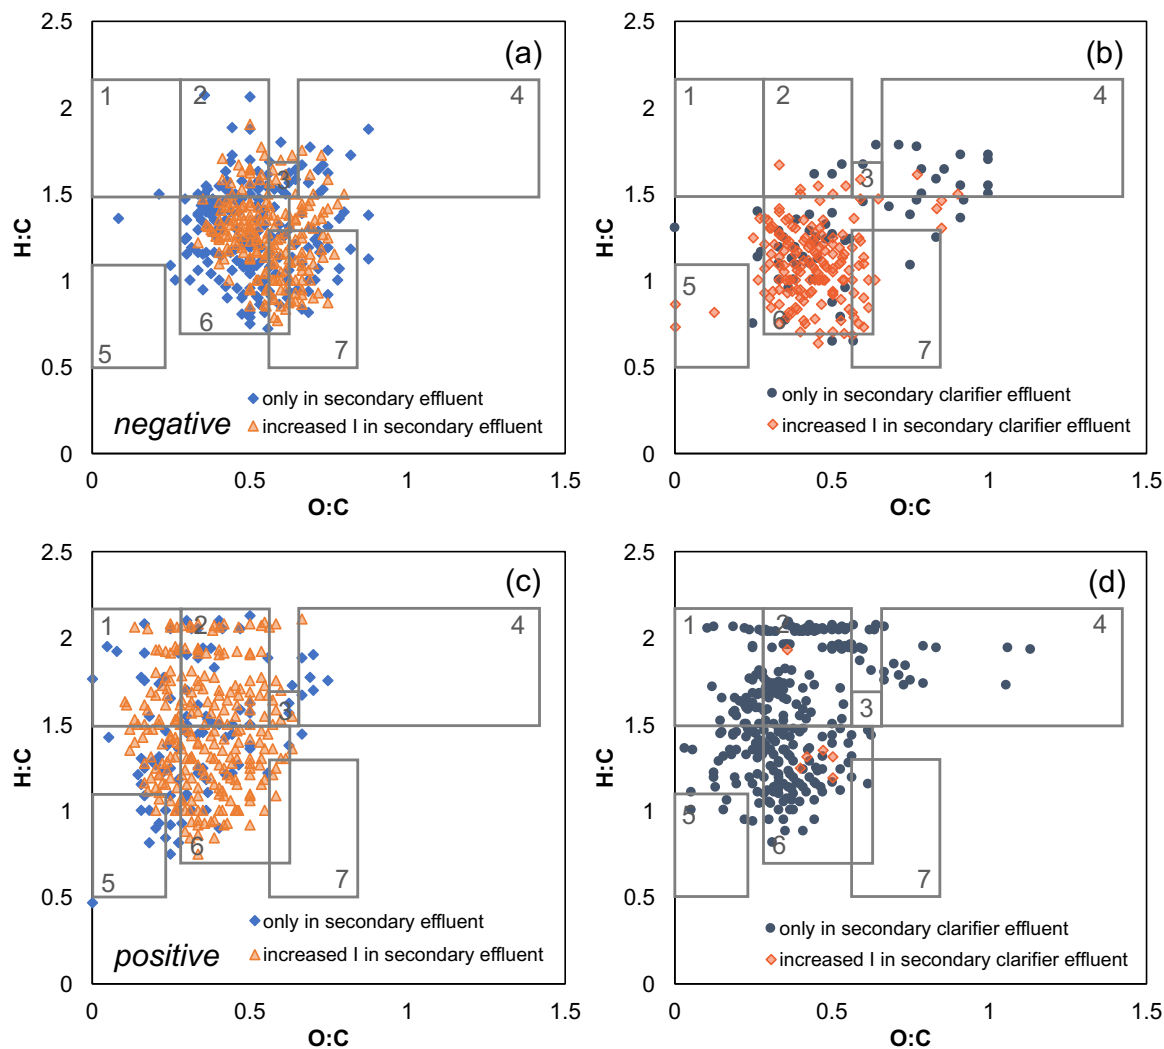

**Figure S37.** Negative and positive mode CHON formulas that were (a, c) only present in UCT secondary effluent or had increased relative intensity in UCT secondary effluent compared to UCT secondary clarifier effluent and (b, d) only present in UCT secondary clarifier effluent or had increased relative intensity in UCT secondary clarifier effluent compared to UCT secondary effluent.

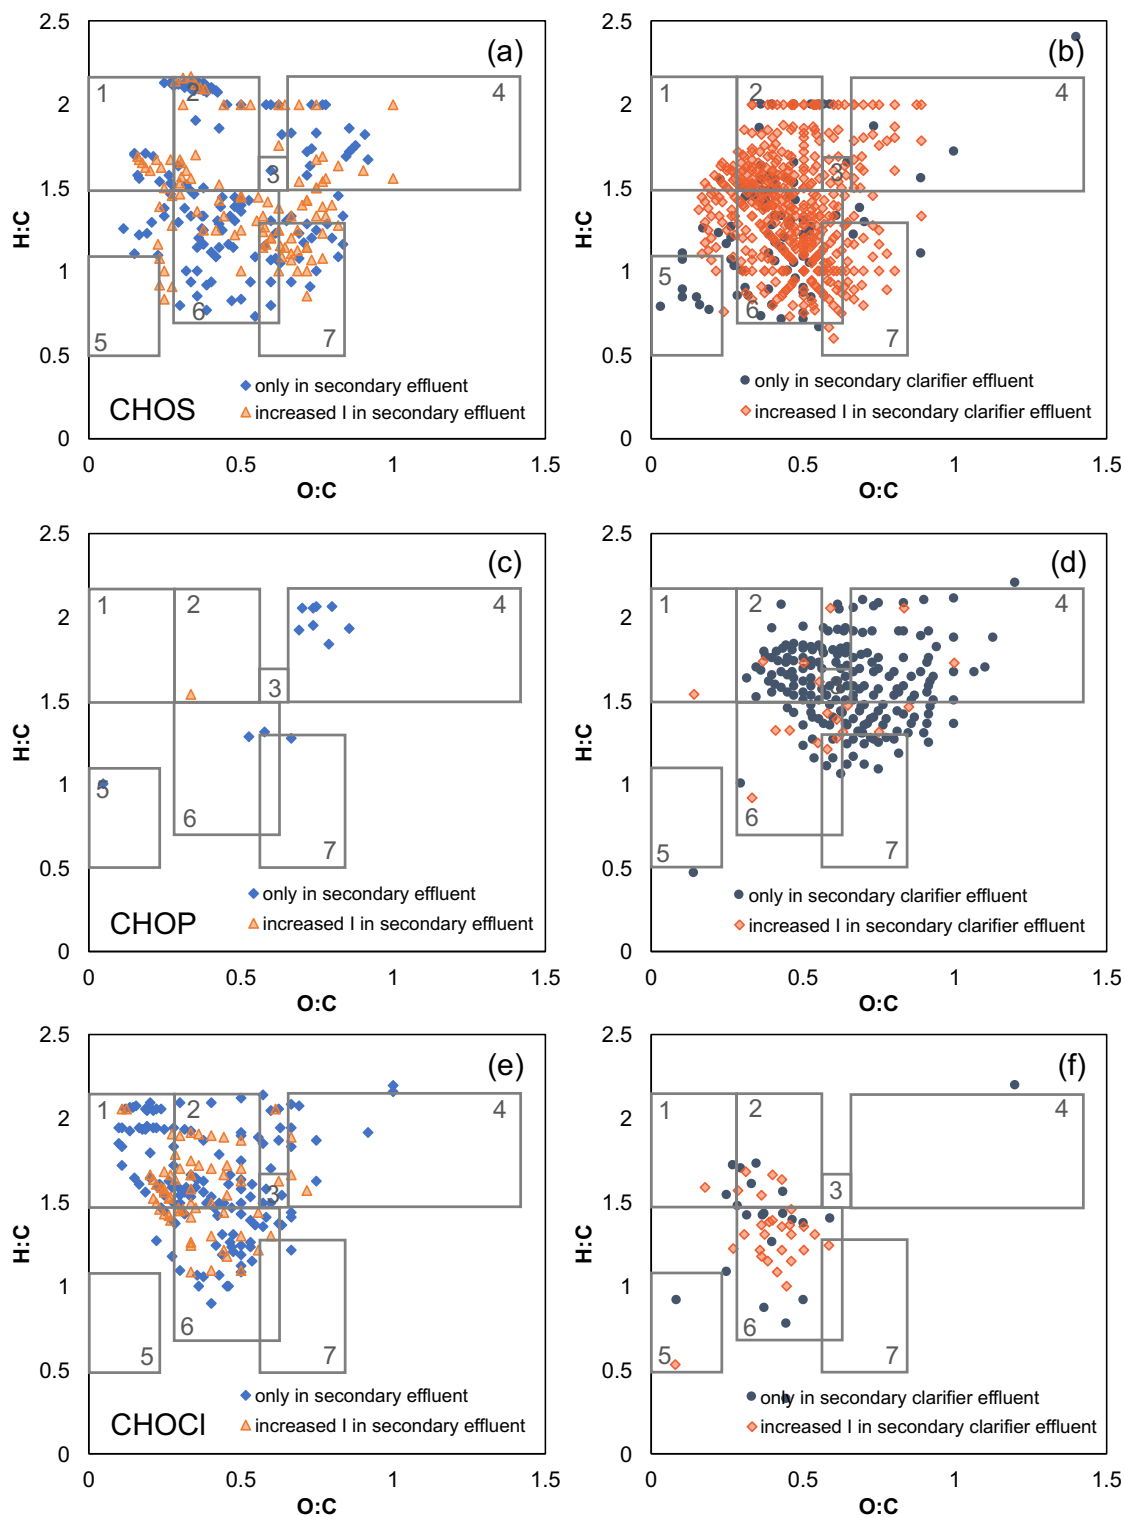

**Figure S38.** Negative mode CHOS, CHOP, and CHOCI formulas that were (a, c, e) only present in UCT secondary effluent or had increased relative intensity in UCT secondary effluent compared to UCT secondary clarifier effluent and (b, d, f) only present in UCT secondary clarifier effluent or had increased relative intensity in UCT secondary clarifier effluent compared to UCT secondary effluent.

*UV influent vs. UV effluent*

**Table S16.** The number, H:C, O:C, and DBE of formulas that were only present in UV influent or had increased relative intensity in UV influent compared to final effluent as determined using FT-ICR MS in negative mode.

| Formula |                         | n    | H:C  | O:C  | DBE   |                         | n   | H:C  | O:C  | DBE  |
|---------|-------------------------|------|------|------|-------|-------------------------|-----|------|------|------|
| CHO     | Only in influent        | 108  | 1.04 | 0.60 | 11.49 | Only in effluent        | 166 | 1.29 | 0.45 | 7.44 |
|         | Increased I in influent | 1111 | 1.23 | 0.51 | 8.63  | Increased I in effluent | 165 | 1.44 | 0.33 | 5.30 |
| CHON    | Only in influent        | 121  | 1.15 | 0.54 | 10.55 | Only in effluent        | 107 | 1.15 | 0.50 | 8.78 |
|         | Increased I in influent | 407  | 1.20 | 0.53 | 8.52  | Increased I in effluent | 36  | 1.19 | 0.33 | 6.92 |
| CHOS    | Only in influent        | 99   | 1.26 | 0.47 | 8.76  | Only in effluent        | 109 | 1.36 | 0.46 | 6.05 |
|         | Increased I in influent | 518  | 1.35 | 0.49 | 6.32  | Increased I in effluent | 47  | 1.47 | 0.28 | 5.23 |
| CHOP    | Only in influent        | 54   | 1.42 | 0.67 | 6.61  | Only in effluent        | 16  | 1.49 | 0.56 | 7.13 |
|         | Increased I in influent | 181  | 1.59 | 0.67 | 4.75  | Increased I in effluent | 5   | 1.59 | 0.54 | 5.20 |
| CHOCI   | Only in influent        | 13   | 1.40 | 0.44 | 5.46  | Only in effluent        | 26  | 1.50 | 0.37 | 3.81 |
|         | Increased I in influent | 74   | 1.48 | 0.35 | 4.04  | Increased I in effluent | 8   | 1.35 | 0.36 | 4.38 |

**Table S17.** The number, H:C, O:C, and DBE of formulas that were only present in UV influent or had increased relative intensity in UV influent compared to final effluent as determined using FT-ICR MS in positive mode.

| Formula |                         | n   | H:C  | O:C  | DBE  |                         | n   | H:C  | O:C  | DBE  |
|---------|-------------------------|-----|------|------|------|-------------------------|-----|------|------|------|
| CHO     | Only in influent        | 89  | 1.54 | 0.48 | 6.40 | Only in effluent        | 296 | 1.40 | 0.37 | 7.81 |
|         | Increased I in influent | 175 | 1.81 | 0.55 | 2.80 | Increased I in effluent | 789 | 1.50 | 0.44 | 6.02 |
| CHON    | Only in influent        | 262 | 1.56 | 0.39 | 6.34 | Only in effluent        | 96  | 1.47 | 0.37 | 6.09 |
|         | Increased I in influent | 355 | 1.50 | 0.35 | 6.18 | Increased I in effluent | 16  | 1.52 | 0.40 | 5.81 |

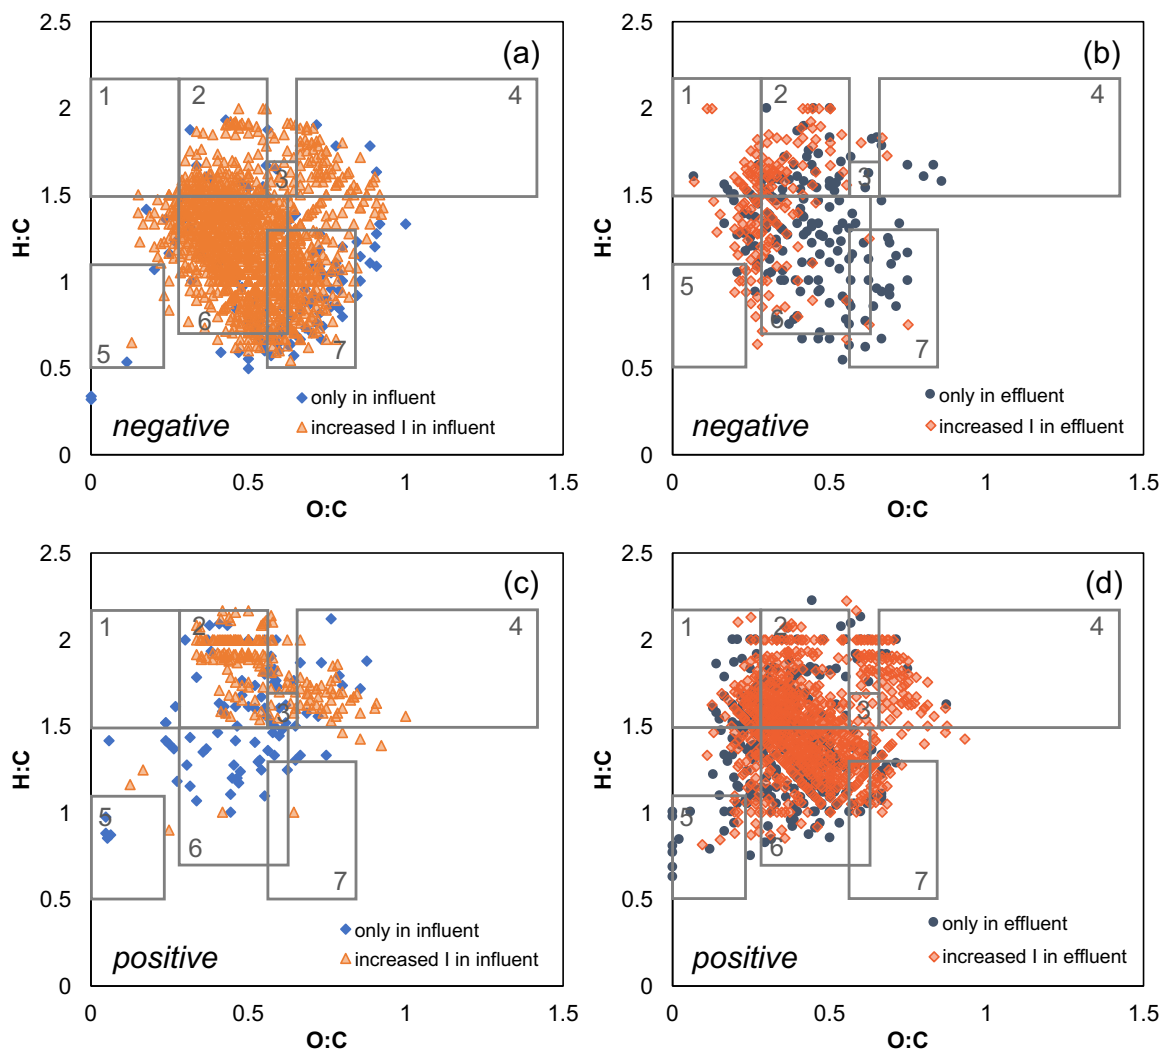

**Figure S39.** Negative and positive mode CHO formulas that were (a, c) only present in UV influent or had increased relative intensity in UV influent compared to final effluent and (b, d) only present in final effluent or had increased relative intensity in final effluent compared to UV influent.

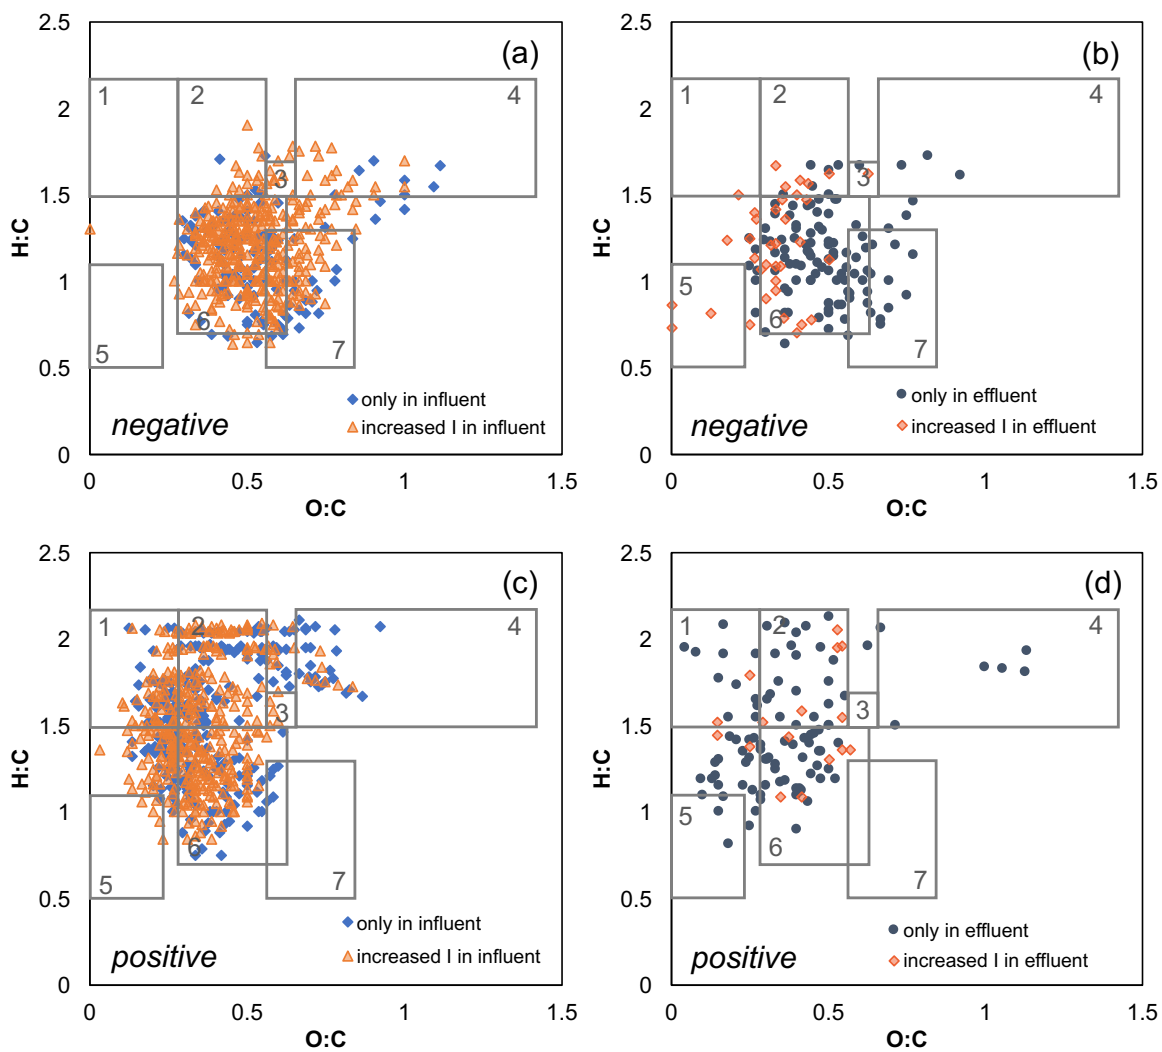

**Figure S40.** Negative and positive mode CHON formulas that were (a, c) only present in UV influent or had increased relative intensity in UV influent compared to final effluent and (b, d) only present in final effluent or had increased relative intensity in final effluent compared to UV influent.

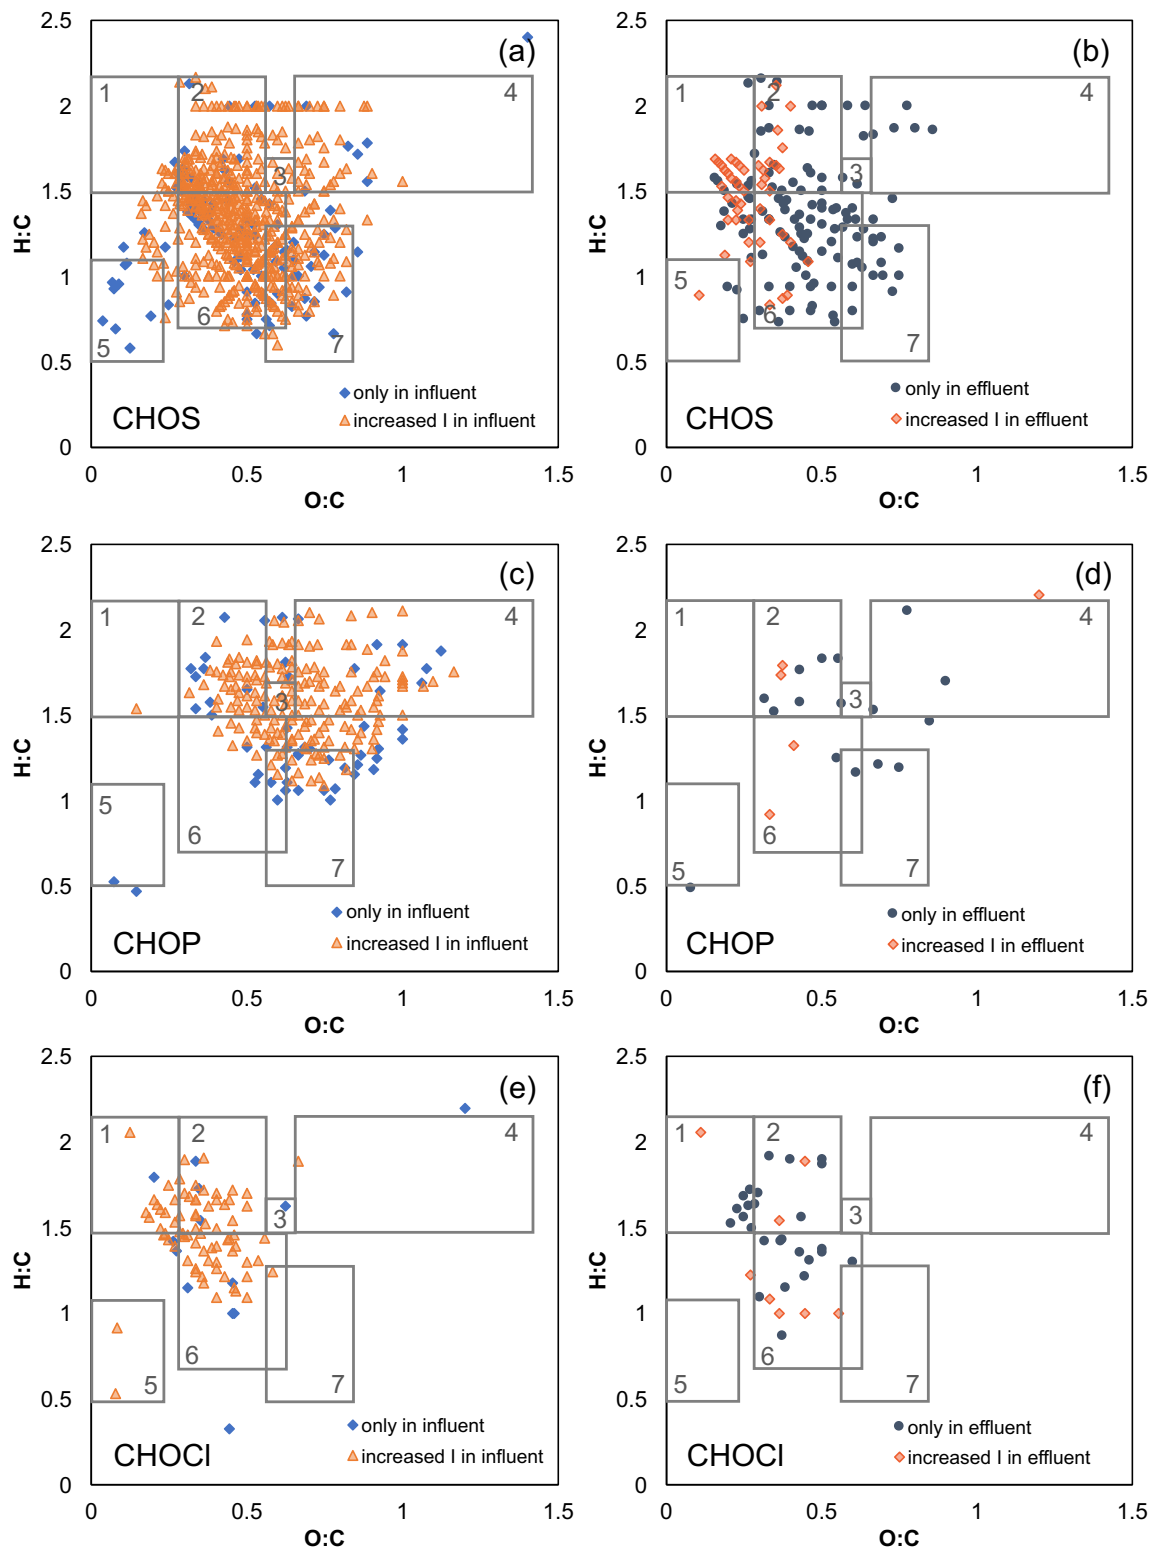

**Figure S41.** Negative mode CHOS, CHOP, and CHOCI formulas that were (a, c, e) only present in UV influent or had increased relative intensity in UV influent compared to final effluent and (b, d, f) only present in final effluent or had increased relative in intensity in final effluent compared to UV influent.

*Ostara influent vs. Ostara effluent*

**Table S18.** The number, H:C, O:C, and DBE of formulas that were only present in Ostara influent or had increased relative intensity in Ostara influent compared to Ostara effluent as determined using FT-ICR MS in negative mode.

| Formula |                         | n   | H:C  | O:C  | DBE   |                         | n   | H:C  | O:C  | DBE  |
|---------|-------------------------|-----|------|------|-------|-------------------------|-----|------|------|------|
| CHO     | Only in influent        | 383 | 1.41 | 0.45 | 6.60  | Only in effluent        | 518 | 1.36 | 0.42 | 7.42 |
|         | Increased I in influent | 517 | 1.40 | 0.41 | 7.27  | Increased I in effluent | 218 | 1.31 | 0.57 | 7.71 |
| CHON    | Only in influent        | 200 | 1.32 | 0.47 | 7.53  | Only in effluent        | 484 | 1.34 | 0.45 | 7.46 |
|         | Increased I in influent | 88  | 1.27 | 0.43 | 8.76  | Increased I in effluent | 61  | 1.37 | 0.56 | 7.59 |
| CHOS    | Only in influent        | 308 | 1.42 | 0.44 | 6.19  | Only in effluent        | 189 | 1.46 | 0.45 | 5.35 |
|         | Increased I in influent | 131 | 1.37 | 0.43 | 6.78  | Increased I in effluent | 119 | 1.47 | 0.51 | 5.58 |
| CHOP    | Only in influent        | 14  | 0.75 | 0.16 | 19.07 | Only in effluent        | 44  | 1.57 | 0.43 | 6.27 |
|         | Increased I in influent | 0   | NA   | NA   | NA    | Increased I in effluent | 5   | 1.62 | 0.65 | 6.40 |
| CHOCI   | Only in influent        | 22  | 1.51 | 0.29 | 3.95  | Only in effluent        | 61  | 1.63 | 0.35 | 2.92 |
|         | Increased I in influent | 1   | 1.23 | 0.27 | 9.00  | Increased I in effluent | 39  | 1.62 | 0.34 | 3.00 |

**Table S19.** The number, H:C, O:C, and DBE of formulas that were only present in Ostara influent or had increased relative intensity in Ostara influent compared to Ostara effluent as determined using FT-ICR MS in positive mode.

| Formula |                         | n   | H:C  | O:C  | DBE  |                         | n   | H:C  | O:C  | DBE  |
|---------|-------------------------|-----|------|------|------|-------------------------|-----|------|------|------|
| CHO     | Only in influent        | 135 | 1.52 | 0.40 | 7.19 | Only in effluent        | 232 | 1.54 | 0.40 | 5.48 |
|         | Increased I in influent | 80  | 1.60 | 0.50 | 5.85 | Increased I in effluent | 705 | 1.61 | 0.42 | 4.92 |
| CHON    | Only in influent        | 63  | 1.56 | 0.35 | 6.57 | Only in effluent        | 162 | 1.58 | 0.35 | 5.85 |
|         | Increased I in influent | 51  | 1.64 | 0.31 | 5.33 | Increased I in effluent | 70  | 1.60 | 0.31 | 5.39 |

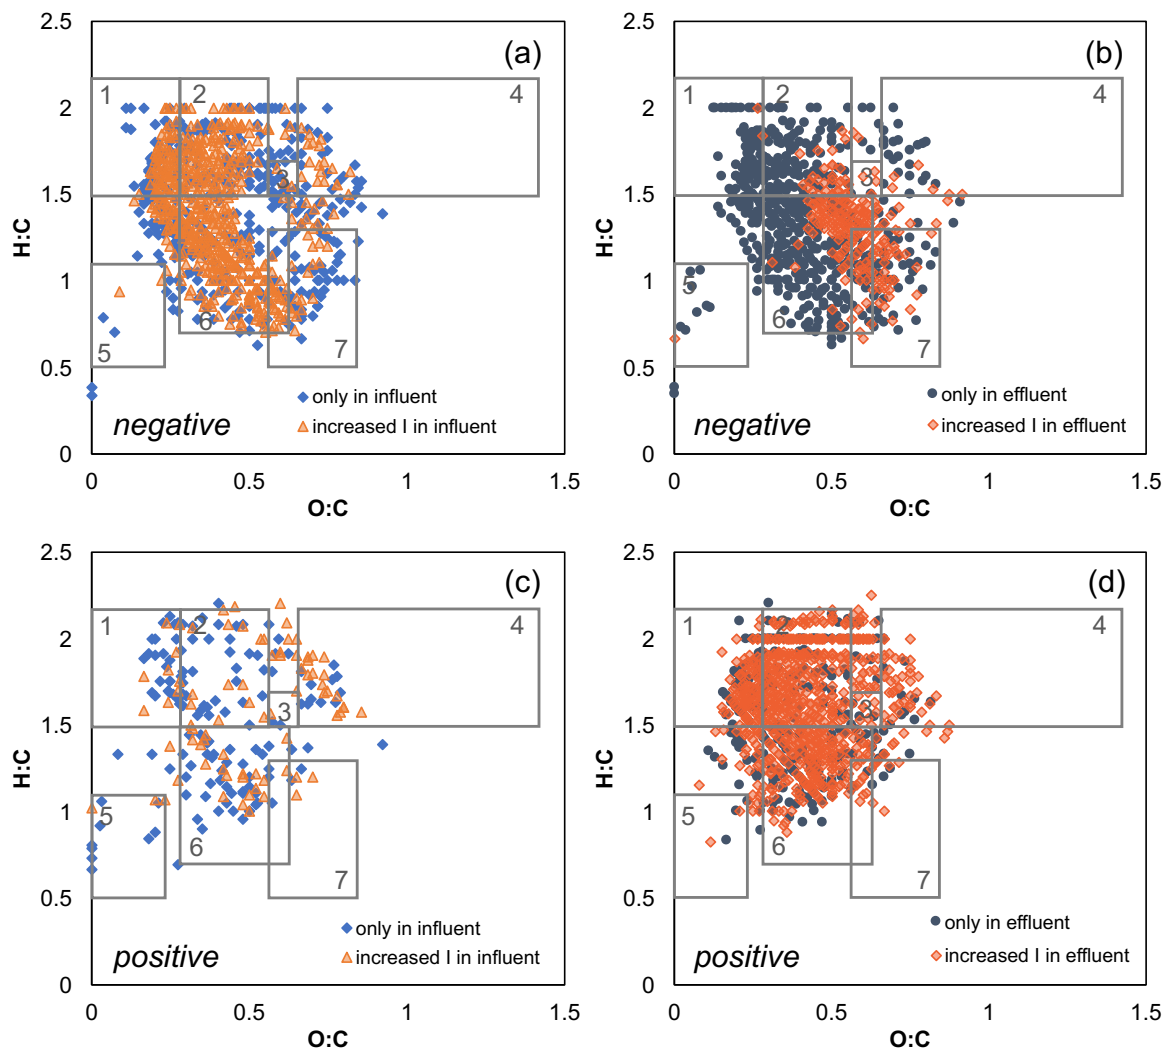

**Figure S42.** Negative and positive mode CHO formulas that were (a, c) only present in Ostara influent or had increased relative intensity in Ostara influent compared to Ostara effluent and (b, d) only present in Ostara effluent or had increased relative in intensity in Ostara effluent compared to Ostara influent.



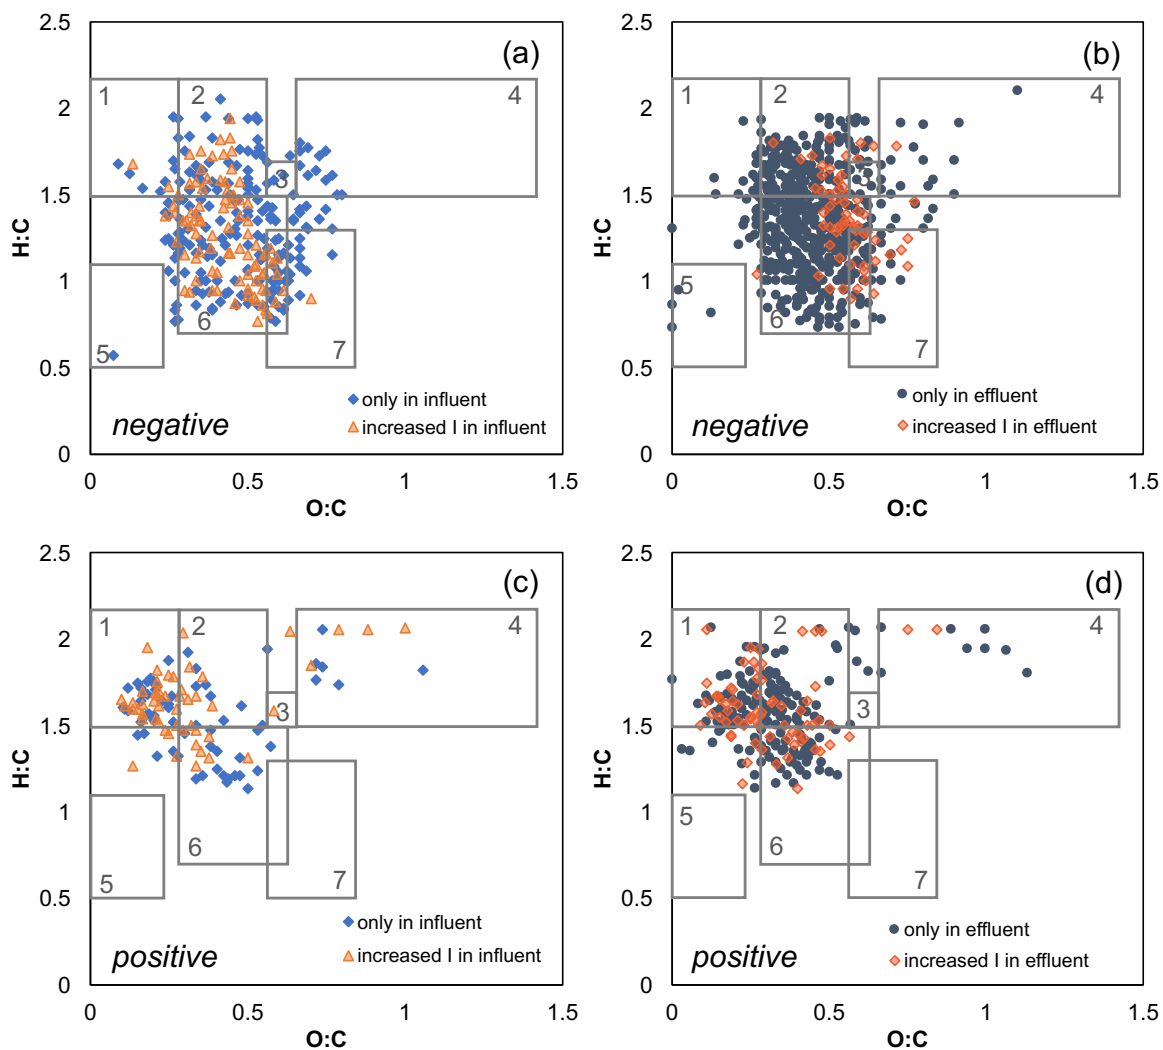

**Figure S43.** Negative and positive mode CHON formulas that were (a, c) only present in Ostara influent or had increased relative intensity in Ostara influent compared to Ostara effluent and (b, d) only present in Ostara effluent or had increased relative intensity in Ostara effluent compared to Ostara influent.

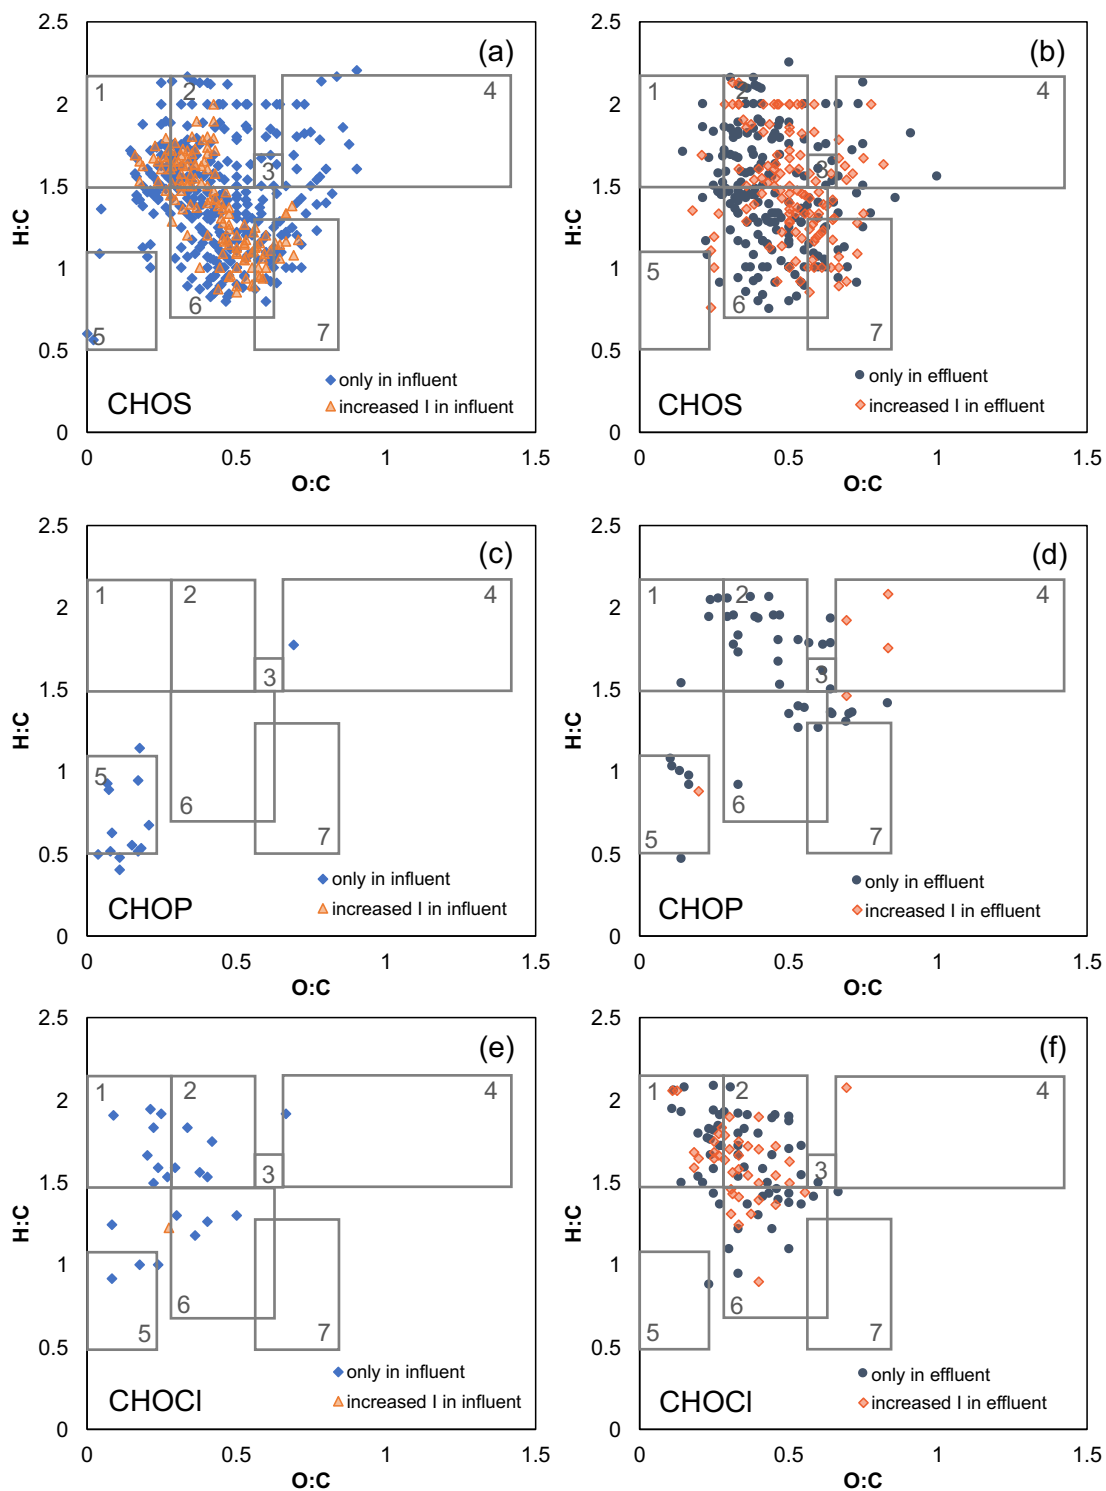

**Figure S44.** Negative mode CHOS, CHOP, and CHOCI formulas that were (a, c, e) only present in Ostara influent or had increased relative intensity in Ostara influent compared to Ostara effluent and (b, d, f) only present in Ostara effluent or had increased relative in intensity in Ostara effluent compared to Ostara influent.

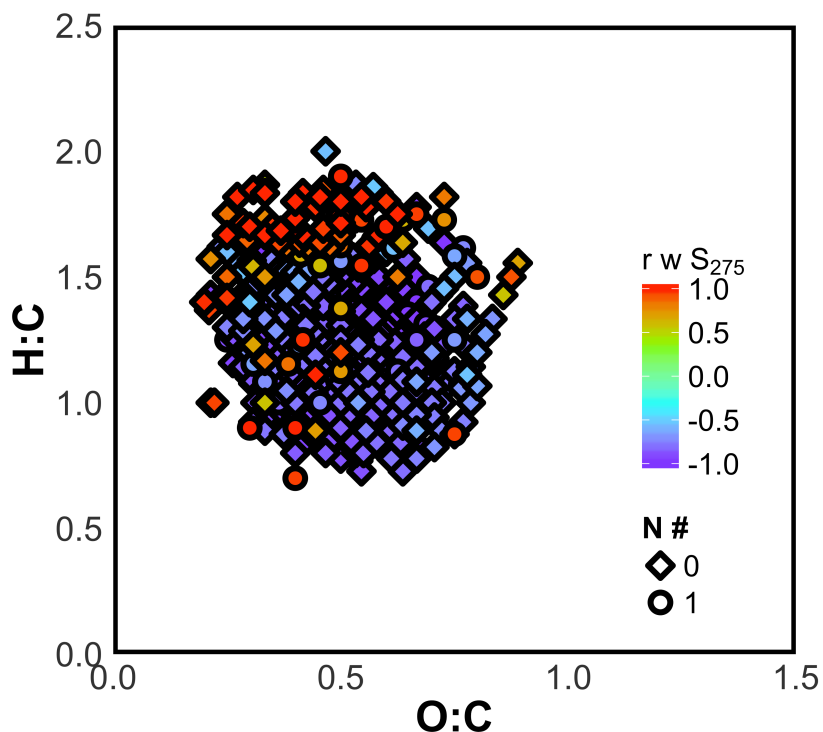

**Figure S45.** Pearson correlation coefficients calculated between the relative intensity of common FT-ICR MS CHO and CHON formulas and S275-295. The analysis was conducted using negative mode formulas in all samples excepting the Ostara influent and effluent. Only formulas with  $r \leq -0.5$  or  $r \geq 0.5$  are shown.

## References

Hockaday, W.C., Purcell, J.M. and Marshall, A.G. (2009) Electrospray and photoionization mass spectrometry for the characterization of organic matter in natural waters: a qualitative assessment. *Limnol. Oceanogr.* 7, 81-95.

Kujawinski, E.B., Longnecker, K., Blough, N.V., del Vecchio, R., Finlay, L., Kitner, J.B. and Giovannoni, S.J. (2009) Identification of possible source markers in marine dissolved organic matter using ultrahigh resolution mass spectrometry. *Geochim. Cosmochim. Acta* 73(15), 4384-4399.

Sleighter, R.L. and Hatcher, P.G. (2007) The application of electrospray ionization coupled to ultrahigh resolution mass spectrometry for the molecular characterization of natural organic matter. *J. Mass Spectrom.* 42(5), 559-574.
